# Supplementary material for: One Iron Injection Is Not Enough—Iron Status and Growth of Suckling Piglets on an Organic Farm
Source: Animals (Basel). 2019 Sep 4;9(9):651. doi: 10.3390/ani9090651 (PMC6770926; doi:10.3390/ani9090651)
Supplement: Supplementary file 1 [file animals-09-00651-s001.xls]

## Sheet: main table
sow	parity	litter_id	piglet_id	birth_date	sex	lw_birth	treatment	sampling_date	day_of_life	liveweight	haematocrit	serum_iron	weaning_age	daily_gain	loss_3_14	loss_14_wean	treatm_3_14	treatm_14_wean
2381	2	2381_2	2381_2_4	2016-02-14	m	1.5	iron1	2016-02-17	3	1.9	30	9.48	46	.	1	0	0	0
2381	2	2381_2	2381_2_7	2016-02-14	w	1.5	iron3	2016-02-17	3	2.1	16	5.56	46	373.913	0	0	0	0
2381	2	2381_2	2381_2_9	2016-02-14	w	1.2	iron3	2016-02-17	3	1.7	30	5.38	46	293.478	0	0	0	0
2381	2	2381_2	2381_2_2	2016-02-14	m	1.6	iron1	2016-02-17	3	2.2	26	2.84	46	321.739	0	0	0	0
2381	2	2381_2	2381_2_1	2016-02-14	m	1.7	iron3	2016-02-17	3	2.1	24	10.25	46	330.435	0	0	0	0
2381	2	2381_2	2381_2_8	2016-02-14	m	1.4	iron1	2016-02-17	3	1.7	19	3.79	46	213.043	0	0	0	0
2381	2	2381_2	2381_2_6	2016-02-14	w	1.5	iron2	2016-02-17	3	2	10	6.68	46	258.696	0	0	0	0
2381	2	2381_2	2381_2_3	2016-02-14	m	1.5	iron2	2016-02-17	3	1.8	33	7.97	46	291.304	0	0	0	0
2381	2	2381_2	2381_2_5	2016-02-14	m	1.5	iron2	2016-02-17	3	1.9	22	6.25	46	304.348	0	0	0	0
5533	1	5533_1	5533_1_1	2016-02-15	m	2	iron3	2016-02-18	3	2.5	27	3.01	45	.	0	1	0	0
5533	1	5533_1	5533_1_10	2016-02-15	w	1.4	iron1	2016-02-18	3	1.6	10	6.68	45	164.444	0	0	0	0
5533	1	5533_1	5533_1_4	2016-02-15	w	1.6	iron3	2016-02-18	3	1.9	.	2.24	45	293.333	0	0	0	0
5533	1	5533_1	5533_1_6	2016-02-15	w	1.5	iron1	2016-02-18	3	1.9	15	4.69	45	291.111	0	0	0	0
5533	1	5533_1	5533_1_5	2016-02-15	w	1.5	iron2	2016-02-18	3	2	19	4.26	45	306.667	0	0	0	0
5533	1	5533_1	5533_1_7	2016-02-15	w	1.5	iron3	2016-02-18	3	1.7	10	7.45	45	204.444	0	0	0	0
5533	1	5533_1	5533_1_2	2016-02-15	m	1.8	iron2	2016-02-18	3	2.3	27	17.53	45	306.667	0	0	0	0
5533	1	5533_1	5533_1_12	2016-02-15	m	1.1	iron2	2016-02-18	3	1.4	15	11.03	45	255.556	0	0	0	0
5533	1	5533_1	5533_1_8	2016-02-15	w	1.5	iron1	2016-02-18	3	1.9	25	2.58	45	206.667	0	0	0	0
561	8	561_8	561_8_13	2016-03-02	w	1.2	iron3	2016-03-05	3	1.6	14	5.13	43	255.814	0	0	0	0
561	8	561_8	561_8_6	2016-03-02	w	1.5	iron2	2016-03-05	3	1.8	10	2.07	43	269.767	0	0	0	0
561	8	561_8	561_8_12	2016-03-02	w	1.3	iron3	2016-03-05	3	1.7	10	9.52	43	188.372	0	0	0	0
561	8	561_8	561_8_3	2016-03-02	w	1.9	iron1	2016-03-05	3	2.5	.	2.97	43	344.186	0	0	0	0
561	8	561_8	561_8_1	2016-03-02	m	2	iron2	2016-03-05	3	2.6	10	4.05	43	283.721	0	0	0	0
561	8	561_8	561_8_7	2016-03-02	w	1.5	iron3	2016-03-05	3	1.9	19	3.96	43	313.953	0	0	0	0
561	8	561_8	561_8_11	2016-03-02	m	1.4	iron2	2016-03-05	3	2	.	4.78	43	279.07	0	0	0	0
561	8	561_8	561_8_9	2016-03-02	w	1.4	iron1	2016-03-05	3	1.7	15	3.79	43	200	0	0	0	1
561	8	561_8	561_8_5	2016-03-02	m	1.5	iron1	2016-03-05	3	2	16	3.7	43	281.395	0	0	1	0
5526	1	5526_1	5526_1_1	2016-03-03	w	1.5	iron1	2016-03-06	3	1.9	23	4.57	42	183.333	0	0	0	0
5526	1	5526_1	5526_1_3	2016-03-03	w	1.4	iron3	2016-03-06	3	1.7	22	3.75	42	171.429	0	0	0	0
5526	1	5526_1	5526_1_4	2016-03-03	w	1.3	iron1	2016-03-06	3	1.7	22	.	42	202.381	0	0	0	0
5526	1	5526_1	5526_1_10	2016-03-03	m	1.1	iron3	2016-03-06	3	1.5	23	3.96	42	207.143	0	0	0	0
5526	1	5526_1	5526_1_9	2016-03-03	w	1.1	iron2	2016-03-06	3	1.2	21	3.1	42	147.619	0	0	0	0
5526	1	5526_1	5526_1_6	2016-03-03	m	1.2	iron3	2016-03-06	3	1.5	23	4.05	42	200	0	0	0	0
5526	1	5526_1	5526_1_8	2016-03-03	m	1.1	iron2	2016-03-06	3	1.3	21	2.54	42	188.095	0	0	0	0
5526	1	5526_1	5526_1_7	2016-03-03	w	1.2	iron2	2016-03-06	3	1.5	23	2.63	42	176.19	0	0	0	0
5526	1	5526_1	5526_1_2	2016-03-03	m	1.4	iron1	2016-03-06	3	1.8	.	2.37	42	178.571	0	0	0	0
2382	1	2382_1	2382_1_6	2016-05-12	w	1.5	iron1	2016-05-14	2	1.6	10	6.63	42	238.095	0	0	0	0
2382	1	2382_1	2382_1_2	2016-05-12	m	1.8	iron1	2016-05-14	2	2	17	7.71	42	247.619	0	0	0	0
2382	1	2382_1	2382_1_9	2016-05-12	w	1.2	iron3	2016-05-14	2	1.3	11	9.39	42	216.667	0	0	0	0
2382	1	2382_1	2382_1_5	2016-05-12	m	1.6	iron2	2016-05-14	2	1.8	22	8.66	42	252.381	0	0	0	0
2382	1	2382_1	2382_1_3	2016-05-12	w	1.8	iron1	2016-05-14	2	2	.	8.92	42	273.81	0	0	0	0
2382	1	2382_1	2382_1_7	2016-05-12	w	1.3	iron3	2016-05-14	2	1.4	13	2.28	42	254.762	0	0	0	0
2382	1	2382_1	2382_1_8	2016-05-12	w	1.3	iron2	2016-05-14	2	1.4	19	8.83	42	250	0	0	0	0
2382	1	2382_1	2382_1_4	2016-05-12	w	1.7	iron3	2016-05-14	2	1.8	17	11.76	42	252.381	0	0	0	0
2382	1	2382_1	2382_1_1	2016-05-12	w	1.9	iron2	2016-05-14	2	2	29	4.78	42	233.333	0	0	0	0
2383	1	2383_1	2383_1_6	2016-05-10	w	1.4	iron2	2016-05-13	3	1.6	25	3.01	44	295.455	0	0	0	0
2383	1	2383_1	2383_1_3	2016-05-10	m	1.6	iron3	2016-05-13	3	1.8	28	6.76	44	304.545	0	0	0	0
2383	1	2383_1	2383_1_7	2016-05-10	w	1.4	iron2	2016-05-13	3	1.7	25	3.62	44	288.636	0	0	0	0
2383	1	2383_1	2383_1_10	2016-05-10	m	1.3	iron2	2016-05-13	3	1.5	23	3.92	44	279.545	0	0	0	0
2383	1	2383_1	2383_1_4	2016-05-10	w	1.6	iron3	2016-05-13	3	1.9	23	3.23	44	300	0	0	0	0
2383	1	2383_1	2383_1_5	2016-05-10	w	1.5	iron3	2016-05-13	3	1.8	26	7.06	44	300	0	0	0	0
2383	1	2383_1	2383_1_2	2016-05-10	w	1.7	iron1	2016-05-13	3	2	17	1.98	44	286.364	0	0	0	0
2383	1	2383_1	2383_1_9	2016-05-10	w	1.3	iron1	2016-05-13	3	1.5	22	4.31	44	240.909	0	0	0	0
2383	1	2383_1	2383_1_1	2016-05-10	m	1.9	iron1	2016-05-13	3	2.1	29	4.31	44	288.636	0	0	0	0
5532	1	5532_1	5532_1_3	2016-05-23	w	1.8	iron2	2016-05-26	3	2.1	23	2.41	45	266.667	0	0	0	0
5532	1	5532_1	5532_1_5	2016-05-23	m	1.8	iron3	2016-05-26	3	2.1	20	4.09	45	262.222	0	0	0	0
5532	1	5532_1	5532_1_8	2016-05-23	w	1.7	iron1	2016-05-26	3	2	32	19.7	45	282.222	0	0	0	0
5532	1	5532_1	5532_1_1	2016-05-23	w	1.9	iron3	2016-05-26	3	2.2	27	3.96	45	304.444	0	0	0	0
5532	1	5532_1	5532_1_12	2016-05-23	m	1.2	iron1	2016-05-26	3	1.5	23	3.75	45	180	0	0	0	0
5532	1	5532_1	5532_1_2	2016-05-23	w	1.9	iron1	2016-05-26	3	2.2	22	1.94	45	273.333	0	0	0	0
5532	1	5532_1	5532_1_11	2016-05-23	m	1.4	iron2	2016-05-26	3	1.6	22	6.55	45	224.444	0	0	0	0
5532	1	5532_1	5532_1_9	2016-05-23	w	1.4	iron3	2016-05-26	3	1.6	19	3.7	45	255.556	0	0	0	0
5532	1	5532_1	5532_1_7	2016-05-23	w	1.7	iron2	2016-05-26	3	2	20	2.28	45	233.333	0	0	0	0
5014	8	5014_8	5014_8_8	2016-05-15	w	1.8	iron1	2016-05-18	3	2.2	31	4.01	39	266.667	0	0	0	0
5014	8	5014_8	5014_8_3	2016-05-15	w	2.2	iron1	2016-05-18	3	2.6	18	2.15	39	297.436	0	0	0	0
5014	8	5014_8	5014_8_7	2016-05-15	w	1.8	iron1	2016-05-18	3	2.2	30	19.2	39	258.974	0	0	0	0
5014	8	5014_8	5014_8_1	2016-05-15	w	2.2	iron2	2016-05-18	3	2.7	26	3.32	39	312.821	0	0	0	0
5014	8	5014_8	5014_8_6	2016-05-15	w	2	iron2	2016-05-18	3	2.5	26	1.94	39	366.667	0	0	0	0
5014	8	5014_8	5014_8_11	2016-05-15	w	1.6	iron3	2016-05-18	3	1.9	27	1.85	39	261.538	0	0	0	0
5014	8	5014_8	5014_8_4	2016-05-15	w	2.1	iron3	2016-05-18	3	2.5	.	1.98	39	297.436	0	0	0	0
5014	8	5014_8	5014_8_5	2016-05-15	w	1.9	iron2	2016-05-18	3	2.2	28	3.32	39	333.333	0	0	0	0
5014	8	5014_8	5014_8_10	2016-05-15	m	1.6	iron3	2016-05-18	3	1.9	29	2.58	39	210.256	0	0	0	0
48241	1	48241_1	48241_1_9	2016-06-04	m	1.1	iron3	2016-06-07	3	1.2	30	5.77	.	.	0	0	0	0
48241	1	48241_1	48241_1_7	2016-06-04	m	1.1	iron1	2016-06-07	3	1.2	38	13.31	.	.	0	0	0	0
48241	1	48241_1	48241_1_12	2016-06-04	w	0.7	iron2	2016-06-07	3	0.9	27	14.3	.	.	0	0	0	0
48241	1	48241_1	48241_1_4	2016-06-04	w	1.1	iron3	2016-06-07	3	1.3	28	8.1	.	.	0	0	0	0
48241	1	48241_1	48241_1_8	2016-06-04	m	1.1	iron2	2016-06-07	3	1.4	25	5.94	.	.	0	0	0	0
48241	1	48241_1	48241_1_1	2016-06-04	m	1.3	iron3	2016-06-07	3	1.5	30	10.12	.	.	0	0	0	0
48241	1	48241_1	48241_1_3	2016-06-04	w	1.2	iron2	2016-06-07	3	1.3	23	5.38	.	.	0	0	0	0
48241	1	48241_1	48241_1_2	2016-06-04	m	1.2	iron1	2016-06-07	3	1.3	31	9.04	.	.	0	0	0	0
48241	1	48241_1	48241_1_5	2016-06-04	w	1.1	iron1	2016-06-07	3	1.3	30	15.12	.	.	0	0	0	0
51932	3	51932_3	51932_3_7	2016-06-16	m	1.2	iron1	2016-06-19	3	1.6	10	4.69	42	266.667	0	0	0	0
51932	3	51932_3	51932_3_9	2016-06-16	m	1.1	iron3	2016-06-19	3	1.5	23	3.27	42	278.571	0	0	0	0
51932	3	51932_3	51932_3_10	2016-06-16	w	1.1	iron3	2016-06-19	3	1.5	31	1.94	42	.	1	0	0	0
51932	3	51932_3	51932_3_8	2016-06-16	w	1.2	iron1	2016-06-19	3	1.9	28	4.69	42	283.333	0	0	0	0
51932	3	51932_3	51932_3_3	2016-06-16	w	1.3	iron3	2016-06-19	3	1.9	23	2.67	42	271.429	0	0	0	0
51932	3	51932_3	51932_3_2	2016-06-16	m	1.6	iron1	2016-06-19	3	2.1	18	3.23	42	266.667	0	0	0	0
51932	3	51932_3	51932_3_5	2016-06-16	m	1.3	iron2	2016-06-19	3	1.7	19	2.71	42	195.238	0	0	0	0
51932	3	51932_3	51932_3_6	2016-06-16	w	1.3	iron2	2016-06-19	3	1.7	25	2.33	42	219.048	0	0	0	0
51932	3	51932_3	51932_3_4	2016-06-16	w	1.3	iron2	2016-06-19	3	2.1	26	4.13	42	314.286	0	0	0	0
51941	3	51941_3	51941_3_7	2016-06-16	w	1	iron1	2016-06-19	3	1.2	10	3.36	42	209.524	0	0	0	0
51941	3	51941_3	51941_3_4	2016-06-16	w	1.3	iron1	2016-06-19	3	1.9	25	3.1	42	261.905	0	0	0	0
51941	3	51941_3	51941_3_2	2016-06-16	w	1.4	iron3	2016-06-19	3	1.7	28	3.66	42	300	0	0	0	0
51941	3	51941_3	51941_3_9	2016-06-16	m	0.8	iron1	2016-06-19	3	1.2	22	1.98	42	307.143	0	0	0	0
51941	3	51941_3	51941_3_3	2016-06-16	w	1.3	iron2	2016-06-19	3	1.9	23	1.46	42	240.476	0	0	0	0
51941	3	51941_3	51941_3_8	2016-06-16	w	0.9	iron2	2016-06-19	3	1.3	22	3.7	42	290.476	0	0	0	0
51941	3	51941_3	51941_3_10	2016-06-16	m	0.8	iron2	2016-06-19	3	1.1	26	2.24	42	.	1	0	0	0
51941	3	51941_3	51941_3_5	2016-06-16	m	1.2	iron3	2016-06-19	3	1.7	23	2.28	42	269.048	0	0	0	0
51941	3	51941_3	51941_3_6	2016-06-16	w	1.1	iron3	2016-06-19	3	1.4	26	2.37	42	.	1	0	0	0
564	6	564_6	564_6_2	2016-03-18	m	2.2	iron3	2016-03-21	3	2.7	18	4.01	41	395.122	0	0	0	0
564	6	564_6	564_6_3	2016-03-18	m	2.2	iron2	2016-03-21	3	3.1	24	3.45	41	458.537	0	0	0	0
564	6	564_6	564_6_4	2016-03-18	m	2.2	iron2	2016-03-21	3	2.9	24	2.76	41	392.683	0	0	0	0
564	6	564_6	564_6_1	2016-03-18	w	2.4	iron3	2016-03-21	3	2.6	28	3.57	41	321.951	0	0	0	0
564	6	564_6	564_6_11	2016-03-18	w	1.1	iron2	2016-03-21	3	1.6	10	3.57	41	348.78	0	0	0	0
564	6	564_6	564_6_5	2016-03-18	w	1.2	iron3	2016-03-21	3	2.9	21	3.57	41	414.634	0	0	0	0
564	6	564_6	564_6_6	2016-03-18	w	2.1	iron1	2016-03-21	3	2.9	19	3.19	41	387.805	0	0	0	0
564	6	564_6	564_6_7	2016-03-18	w	1.9	iron1	2016-03-21	3	2.4	23	3.19	41	275.61	0	0	0	0
564	6	564_6	564_6_8	2016-03-18	m	1.4	iron1	2016-03-21	3	2	24	4.39	41	339.024	0	0	0	0
562	8	562_8	562_8_3	2016-04-29	m	1.5	iron1	2016-05-01	2	1.5	26	1.68	41	248.78	0	0	0	0
562	8	562_8	562_8_6	2016-04-29	w	1.3	iron3	2016-05-01	2	1.6	25	2.15	41	326.829	0	0	0	0
562	8	562_8	562_8_7	2016-04-29	w	1.3	iron3	2016-05-01	2	1.7	26	2.89	41	290.244	0	0	0	0
562	8	562_8	562_8_8	2016-04-29	w	1.3	iron1	2016-05-01	2	1.5	25	2.41	41	192.683	0	0	0	0
562	8	562_8	562_8_9	2016-04-29	w	1.3	iron3	2016-05-01	2	1.7	13	1.94	41	317.073	0	0	0	0
562	8	562_8	562_8_10	2016-04-29	w	1.3	iron1	2016-05-01	2	1.4	28	3.01	41	175.61	0	0	0	0
562	8	562_8	562_8_11	2016-04-29	w	1.3	iron2	2016-05-01	2	1.7	17	2.46	41	324.39	0	0	0	0
562	8	562_8	562_8_12	2016-04-29	w	1.2	iron2	2016-05-01	2	1.5	17	2.71	41	329.268	0	0	0	0
562	8	562_8	562_8_13	2016-04-29	m	1.2	iron2	2016-05-01	2	1.6	27	3.23	41	236.585	0	0	0	0
544	3	544_3	544_3_9	2016-04-26	w	1.5	iron1	2016-04-29	3	1.8	23	3.32	44	277.273	0	0	0	0
544	3	544_3	544_3_12	2016-04-26	w	1.3	iron1	2016-04-29	3	1.7	24	4.26	44	309.091	0	0	0	0
544	3	544_3	544_3_8	2016-04-26	m	1.5	iron3	2016-04-29	3	1.7	24	5	44	284.091	0	0	0	0
544	3	544_3	544_3_11	2016-04-26	w	1.4	iron1	2016-04-29	3	1.8	22	3.23	44	306.818	0	0	0	0
544	3	544_3	544_3_15	2016-04-26	m	0.9	iron3	2016-04-29	3	0.9	28	5.21	44	218.182	0	0	0	0
544	3	544_3	544_3_13	2016-04-26	m	1.1	iron3	2016-04-29	3	1.3	18	1.9	44	.	1	0	0	0
544	3	544_3	544_3_10	2016-04-26	w	1.4	iron2	2016-04-29	3	1.6	24	4.09	44	329.545	0	0	0	0
544	3	544_3	544_3_7	2016-04-26	w	1.6	iron2	2016-04-29	3	1.9	23	1.85	44	393.182	0	0	0	0
544	3	544_3	544_3_6	2016-04-26	m	1.8	iron2	2016-04-29	3	2.1	25	1.81	44	397.727	0	0	0	0
2381	3	2381_3	2381_3_6	2016-07-28	w	1.5	iron3	2016-07-31	3	2	24	5.17	42	300	0	0	0	0
2381	3	2381_3	2381_3_9	2016-07-28	w	1.5	iron3	2016-07-31	3	1.9	26	4.09	42	259.524	0	0	0	0
2381	3	2381_3	2381_3_12	2016-07-28	w	1.3	iron2	2016-07-31	3	1.6	24	5.04	42	216.667	0	0	0	0
2381	3	2381_3	2381_3_11	2016-07-28	m	1.4	iron3	2016-07-31	3	1.5	25	4.95	42	171.429	0	0	0	0
2381	3	2381_3	2381_3_7	2016-07-28	m	1.5	iron2	2016-07-31	3	1.7	28	4.95	42	269.048	0	0	0	0
2381	3	2381_3	2381_3_1	2016-07-28	m	1.7	iron2	2016-07-31	3	1.9	23	4.95	42	192.857	0	0	0	0
2381	3	2381_3	2381_3_10	2016-07-28	m	1.5	iron1	2016-07-31	3	1.8	25	4.05	42	264.286	0	0	0	0
2381	3	2381_3	2381_3_4	2016-07-28	w	1.6	iron1	2016-07-31	3	2	23	6.03	42	247.619	0	0	0	0
2381	3	2381_3	2381_3_5	2016-07-28	w	1.6	iron1	2016-07-31	3	2	26	6.2	42	211.905	0	0	0	0
51931	8	51931_8	51931_8_2	2016-07-29	m	1.7	iron3	2016-08-01	3	2.5	20	2.33	41	253.659	0	0	0	0
51931	8	51931_8	51931_8_12	2016-07-29	w	1.4	iron3	2016-08-01	3	2	21	2.58	41	217.073	0	0	0	0
51931	8	51931_8	51931_8_6	2016-07-29	m	1.6	iron2	2016-08-01	3	2.2	24	5.08	41	275.61	0	0	0	0
51931	8	51931_8	51931_8_7	2016-07-29	w	1.6	iron3	2016-08-01	3	2.4	25	3.75	41	292.683	0	0	0	0
51931	8	51931_8	51931_8_4	2016-07-29	m	1.6	iron2	2016-08-01	3	2.2	23	3.45	41	278.049	0	0	0	0
51931	8	51931_8	51931_8_9	2016-07-29	m	1.5	iron2	2016-08-01	3	2.1	25	8.1	41	246.341	0	0	0	0
51931	8	51931_8	51931_8_10	2016-07-29	m	1.4	iron1	2016-08-01	3	2	27	3.88	41	256.098	0	0	0	0
51931	8	51931_8	51931_8_3	2016-07-29	m	1.7	iron1	2016-08-01	3	2.3	24	5.04	41	190.244	0	0	0	0
51931	8	51931_8	51931_8_1	2016-07-29	m	1.8	iron1	2016-08-01	3	2.4	24	2.5	41	182.927	0	0	0	0
5533	2	5533_2	5533_2_3	2016-07-28	m	1.8	iron2	2016-08-01	4	2.5	19	11.5	42	266.667	0	0	0	0
5533	2	5533_2	5533_2_11	2016-07-28	m	1.3	iron2	2016-08-01	4	1.8	21	9	42	200	0	0	0	0
5533	2	5533_2	5533_2_2	2016-07-28	m	1.8	iron2	2016-08-01	4	2.5	19	5.13	42	209.524	0	0	0	0
5533	2	5533_2	5533_2_6	2016-07-28	m	1.5	iron1	2016-08-01	4	2	24	10.16	42	207.143	0	0	0	0
5533	2	5533_2	5533_2_10	2016-07-28	w	1.3	iron1	2016-08-01	4	1.8	23	11.8	42	154.762	0	0	0	0
5533	2	5533_2	5533_2_8	2016-07-28	m	1.5	iron1	2016-08-01	4	2.1	21	8.61	42	154.762	0	0	0	0
5533	2	5533_2	5533_2_5	2016-07-28	w	1.6	iron3	2016-08-01	4	2.3	26	8.61	42	226.19	0	0	0	0
5533	2	5533_2	5533_2_1	2016-07-28	m	1.9	iron3	2016-08-01	4	2.7	21	8.44	42	280.952	0	0	0	0
5533	2	5533_2	5533_2_4	2016-07-28	w	1.7	iron3	2016-08-01	4	2.5	26	8.05	42	190.476	0	0	0	0
5524	7	5524_7	5524_7_1	2016-08-01	m	2.2	iron1	2016-08-04	3	2.3	22	3.36	43	200	0	0	1	0
5524	7	5524_7	5524_7_9	2016-08-01	w	0.9	iron3	2016-08-04	3	1.1	19	3.01	43	.	1	0	1	0
5524	7	5524_7	5524_7_8	2016-08-01	m	1.6	iron2	2016-08-04	3	1.8	33	5.77	43	451.163	0	0	1	0
5524	7	5524_7	5524_7_3	2016-08-01	w	1.9	iron3	2016-08-04	3	2.3	27	2.71	43	395.349	0	0	1	0
5524	7	5524_7	5524_7_7	2016-08-01	w	1.7	iron2	2016-08-04	3	2	31	7.11	43	500	0	0	1	0
5524	7	5524_7	5524_7_5	2016-08-01	w	1.9	iron1	2016-08-04	3	2.2	25	2.71	43	.	0	0	1	0
5524	7	5524_7	5524_7_4	2016-08-01	m	1.9	iron2	2016-08-04	3	2	22	2.07	43	267.442	0	0	1	0
5524	7	5524_7	5524_7_6	2016-08-01	w	1.8	iron1	2016-08-04	3	2	23	2.71	43	153.488	0	0	1	0
5524	7	5524_7	5524_7_2	2016-08-01	w	2	iron3	2016-08-04	3	2.3	27	2.2	43	516.279	0	0	1	0
48242	1	48242_1	48242_1_2	2016-08-03	m	1.4	iron2	2016-08-06	3	1.6	27	3.92	41	214.634	0	0	0	0
48242	1	48242_1	48242_1_6	2016-08-03	w	1.1	iron2	2016-08-06	3	1.3	30	2.89	41	192.683	0	0	0	0
48242	1	48242_1	48242_1_1	2016-08-03	w	1.4	iron2	2016-08-06	3	1.6	33	2.71	41	134.146	0	0	0	0
48242	1	48242_1	48242_1_7	2016-08-03	w	1.1	iron1	2016-08-06	3	1.3	27	2.41	41	212.195	0	0	0	0
48242	1	48242_1	48242_1_9	2016-08-03	w	0.9	iron1	2016-08-06	3	1.1	31	.	41	175.61	0	0	0	0
48242	1	48242_1	48242_1_5	2016-08-03	w	1.2	iron1	2016-08-06	3	1.4	30	2.76	41	180.488	0	0	0	0
48242	1	48242_1	48242_1_8	2016-08-03	m	1	iron3	2016-08-06	3	1.1	38	3.36	41	182.927	0	0	0	0
48242	1	48242_1	48242_1_3	2016-08-03	m	1.2	iron3	2016-08-06	3	1.4	30	3.06	41	197.561	0	0	0	0
48242	1	48242_1	48242_1_4	2016-08-03	m	1.2	iron3	2016-08-06	3	1.4	26	5.56	41	229.268	0	0	0	0
48243	1	48243_1	48243_1_11	2016-08-09	m	1.3	iron1	2016-08-12	3	1.7	44	20.8	44	243.182	0	0	0	0
48243	1	48243_1	48243_1_2	2016-08-09	w	1.6	iron2	2016-08-12	3	1.9	30	3.14	44	270.455	0	0	0	0
48243	1	48243_1	48243_1_5	2016-08-09	w	1.6	iron1	2016-08-12	3	1.9	28	4.61	44	243.182	0	0	0	0
48243	1	48243_1	48243_1_9	2016-08-09	w	1.4	iron1	2016-08-12	3	1.8	23	2.33	44	277.273	0	0	0	0
48243	1	48243_1	48243_1_3	2016-08-09	m	1.6	iron2	2016-08-12	3	1.9	28	5.94	44	270.455	0	0	0	0
48243	1	48243_1	48243_1_10	2016-08-09	w	1.4	iron2	2016-08-12	3	1.6	30	6.37	44	222.727	0	0	0	0
48243	1	48243_1	48243_1_1	2016-08-09	m	1.8	iron3	2016-08-12	3	2.1	29	4.22	44	261.364	0	0	0	0
48243	1	48243_1	48243_1_4	2016-08-09	w	1.6	iron3	2016-08-12	3	1.9	30	4.48	44	293.182	0	0	0	0
48243	1	48243_1	48243_1_8	2016-08-09	m	1.4	iron3	2016-08-12	3	1.7	28	3.96	44	275	0	0	0	0
5526	2	5526_2	5526_2_10	2016-08-13	w	1.8	iron1	2016-08-16	3	2.3	26	3.4	40	217.5	0	0	0	0
5526	2	5526_2	5526_2_5	2016-08-13	w	2	iron3	2016-08-16	3	2.7	28	2.8	40	240	0	0	0	0
5526	2	5526_2	5526_2_4	2016-08-13	w	2.1	iron3	2016-08-16	3	2.6	27	2.76	40	205	0	0	0	0
5526	2	5526_2	5526_2_12	2016-08-13	m	1.4	iron1	2016-08-16	3	2	28	3.45	40	202.5	0	0	0	0
5526	2	5526_2	5526_2_6	2016-08-13	w	2	iron3	2016-08-16	3	2.5	29	3.01	40	242.5	0	0	0	0
5526	2	5526_2	5526_2_9	2016-08-13	w	1.8	iron1	2016-08-16	3	2.4	29	4.52	40	220	0	0	0	0
5526	2	5526_2	5526_2_1	2016-08-13	w	2.2	iron2	2016-08-16	3	2.5	32	5.64	40	265	0	0	0	0
5526	2	5526_2	5526_2_7	2016-08-13	w	1.9	iron2	2016-08-16	3	2.5	27	3.79	40	252.5	0	0	0	0
5526	2	5526_2	5526_2_2	2016-08-13	m	2.2	iron2	2016-08-16	3	2.9	30	3.02	40	280	0	0	0	0
543	3	543_3	543_3_1	2016-10-19	w	2	iron2	2016-10-22	3	2.5	27	2.71	44	359.091	0	0	0	0
543	3	543_3	543_3_10	2016-10-19	w	1.3	iron1	2016-10-22	3	1.6	24	8.23	44	238.636	0	0	0	0
543	3	543_3	543_3_2	2016-10-19	w	1.7	iron1	2016-10-22	3	2	28	3.36	44	272.727	0	0	0	0
543	3	543_3	543_3_11	2016-10-19	w	1.2	iron2	2016-10-22	3	1.5	14	4.69	44	306.818	0	0	0	0
543	3	543_3	543_3_9	2016-10-19	m	1.3	iron1	2016-10-22	3	1.5	20	6.63	44	243.182	0	0	0	0
543	3	543_3	543_3_8	2016-10-19	m	1.3	iron2	2016-10-22	3	1.4	26	13.35	44	277.273	0	0	0	0
543	3	543_3	543_3_5	2016-10-19	w	1.5	iron3	2016-10-22	3	2	31	5.43	44	315.909	0	0	0	0
543	3	543_3	543_3_6	2016-10-19	w	1.4	iron3	2016-10-22	3	1.8	22	10.08	44	302.273	0	0	0	0
543	3	543_3	543_3_4	2016-10-19	w	1.6	iron3	2016-10-22	3	1.7	16	5.25	44	300	0	0	0	0
544	4	544_4	544_4_2	2016-10-07	w	1.6	iron1	2016-10-10	3	2	24	3.53	42	.	0	1	0	1
544	4	544_4	544_4_5	2016-10-07	m	1.3	iron3	2016-10-10	3	1.8	25	2.15	42	388.095	0	0	0	0
544	4	544_4	544_4_1	2016-10-07	m	1.9	iron1	2016-10-10	3	2.2	22	2.2	42	311.905	0	0	0	0
544	4	544_4	544_4_9	2016-10-07	m	1	iron1	2016-10-10	3	1.2	23	5.13	42	238.095	0	0	0	0
544	4	544_4	544_4_8	2016-10-07	m	1.1	iron3	2016-10-10	3	1.5	22	4.13	42	297.619	0	0	0	0
544	4	544_4	544_4_4	2016-10-07	m	1.4	iron2	2016-10-10	3	1.8	22	2.07	42	259.524	0	0	0	0
544	4	544_4	544_4_6	2016-10-07	w	1.2	iron3	2016-10-10	3	1.5	24	3.62	42	288.095	0	0	0	0
544	4	544_4	544_4_7	2016-10-07	m	1.2	iron2	2016-10-10	3	1.4	27	2.37	42	242.857	0	0	0	0
544	4	544_4	544_4_3	2016-10-07	m	1.6	iron2	2016-10-10	3	2	24	2.33	42	340.476	0	0	0	0
561	9	561_9	561_9_4	2016-09-01	w	1.5	iron2	2016-09-05	4	2.1	26	1.38	42	266.667	0	0	0	0
561	9	561_9	561_9_11	2016-09-01	w	1.2	iron3	2016-09-05	4	1.7	25	1.94	42	259.524	0	0	0	0
561	9	561_9	561_9_2	2016-09-01	w	1.5	iron2	2016-09-05	4	2	26	2.67	42	300	0	0	0	0
561	9	561_9	561_9_5	2016-09-01	m	1.5	iron3	2016-09-05	4	2.2	18	2.33	42	254.762	0	0	0	0
561	9	561_9	561_9_1	2016-09-01	w	1.6	iron3	2016-09-05	4	2.3	22	2.24	42	285.714	0	0	0	0
561	9	561_9	561_9_7	2016-09-01	w	1.4	iron2	2016-09-05	4	2	23	2.11	42	233.333	0	0	0	0
561	9	561_9	561_9_8	2016-09-01	m	1.3	iron1	2016-09-05	4	1.9	22	3.1	42	252.381	0	0	0	0
561	9	561_9	561_9_13	2016-09-01	m	1.2	iron1	2016-09-05	4	1.6	17	2.63	42	169.048	0	0	0	0
561	9	561_9	561_9_3	2016-09-01	w	1.5	iron1	2016-09-05	4	2	23	2.67	42	216.667	0	0	0	0
562	9	562_9	562_9_4	2016-10-06	w	1.6	iron1	2016-10-09	3	2.1	30	6.55	43	302.326	0	0	0	0
562	9	562_9	562_9_3	2016-10-06	w	1.8	iron1	2016-10-09	3	2.3	30	2.41	43	332.558	0	0	0	0
562	9	562_9	562_9_8	2016-10-06	w	1.4	iron2	2016-10-09	3	1.8	26	2.89	43	302.326	0	0	0	0
562	9	562_9	562_9_2	2016-10-06	w	1.9	iron2	2016-10-09	3	2.4	27	3.06	43	325.581	0	0	0	0
562	9	562_9	562_9_5	2016-10-06	m	1.6	iron3	2016-10-09	3	2.1	24	2.5	43	260.465	0	0	0	0
562	9	562_9	562_9_6	2016-10-06	m	1.4	iron1	2016-10-09	3	1.9	29	2.2	43	267.442	0	0	0	0
562	9	562_9	562_9_7	2016-10-06	m	1.4	iron2	2016-10-09	3	1.9	26	2.28	43	290.698	0	0	0	0
562	9	562_9	562_9_11	2016-10-06	w	1.3	iron3	2016-10-09	3	1.9	28	24.2	43	276.744	0	0	0	0
562	9	562_9	562_9_1	2016-10-06	w	1.9	iron3	2016-10-09	3	2.5	27	2.54	43	369.767	0	0	0	0
1911	7	1911_7	1911_7_4	2016-10-07	m	1.8	iron3	2016-10-10	3	2.2	25	4.05	42	311.905	0	0	0	0
1911	7	1911_7	1911_7_7	2016-10-07	w	1.3	iron3	2016-10-10	3	1.6	22	3.19	42	247.619	0	0	1	0
1911	7	1911_7	1911_7_1	2016-10-07	m	2	iron3	2016-10-10	3	2.5	24	4.18	42	.	0	0	0	0
1911	7	1911_7	1911_7_3	2016-10-07	w	1.8	iron2	2016-10-10	3	2.3	25	4.05	42	323.81	0	0	0	0
1911	7	1911_7	1911_7_2	2016-10-07	w	1.8	iron2	2016-10-10	3	2.4	32	3.01	42	316.667	0	0	0	0
1911	7	1911_7	1911_7_5	2016-10-07	w	1.7	iron2	2016-10-10	3	2.1	29	6.68	42	340.476	0	0	0	0
1911	7	1911_7	1911_7_10	2016-10-07	w	1.8	iron1	2016-10-10	3	2.2	22	1.51	42	204.762	0	0	0	0
1911	7	1911_7	1911_7_8	2016-10-07	w	1.1	iron1	2016-10-10	3	1.3	23	8.49	42	166.667	0	0	0	0
1911	7	1911_7	1911_7_6	2016-10-07	m	1.5	iron1	2016-10-10	3	2.1	24	4.09	42	264.286	0	0	0	0
1913	1	1913_1	1913_1_2	2016-10-10	m	1.2	iron1	2016-10-13	3	1.6	27	5.94	39	171.795	0	0	0	0
1913	1	1913_1	1913_1_6	2016-10-10	m	1.1	iron2	2016-10-13	3	1.3	24	2.24	39	148.718	0	0	0	0
1913	1	1913_1	1913_1_7	2016-10-10	m	1	iron3	2016-10-13	3	1.4	24	2.5	39	189.744	0	0	0	0
1913	1	1913_1	1913_1_5	2016-10-10	w	1.1	iron1	2016-10-13	3	1.5	29	2.2	39	212.821	0	0	0	0
1913	1	1913_1	1913_1_1	2016-10-10	m	1.4	iron2	2016-10-13	3	1.9	22	2.15	39	233.333	0	0	0	0
1913	1	1913_1	1913_1_4	2016-10-10	m	1.2	iron1	2016-10-13	3	1.6	18	5	39	235.897	0	0	0	0
1913	1	1913_1	1913_1_10	2016-10-10	m	1	iron2	2016-10-13	3	1.3	25	3.45	39	220.513	0	0	0	0
1913	1	1913_1	1913_1_3	2016-10-10	w	1.2	iron3	2016-10-13	3	1.7	26	2.15	39	284.615	0	0	0	0
1913	1	1913_1	1913_1_9	2016-10-10	w	1	iron3	2016-10-13	3	1.3	29	2.8	39	251.282	0	0	0	0
1915	2	1915_2	1915_2_2	2016-10-19	w	1.7	iron1	2016-10-22	3	1.9	17	2.71	44	234.091	0	0	0	0
1915	2	1915_2	1915_2_3	2016-10-19	m	1.5	iron1	2016-10-22	3	1.7	23	4.18	44	263.636	0	0	0	0
1915	2	1915_2	1915_2_1	2016-10-19	w	1.8	iron1	2016-10-22	3	2.1	26	4.35	44	256.818	0	0	0	0
1915	2	1915_2	1915_2_7	2016-10-19	w	1.3	iron3	2016-10-22	3	1.5	29	3.02	44	304.545	0	0	0	0
1915	2	1915_2	1915_2_9	2016-10-19	w	1.3	iron3	2016-10-22	3	1.6	10	7.15	44	297.727	0	0	0	0
1915	2	1915_2	1915_2_10	2016-10-19	m	1.3	iron3	2016-10-22	3	1.6	23	2.93	44	327.273	0	0	0	0
1915	2	1915_2	1915_2_4	2016-10-19	m	1.5	iron2	2016-10-22	3	1.7	21	2.37	44	329.545	0	0	0	0
1915	2	1915_2	1915_2_5	2016-10-19	m	1.4	iron2	2016-10-22	3	1.7	21	3.14	44	300	0	0	0	0
1915	2	1915_2	1915_2_6	2016-10-19	w	1.3	iron2	2016-10-22	3	1.6	20	2.67	44	293.182	0	0	0	0
2111	1	2111_1	2111_1_13	2016-09-02	w	0.9	iron1	2016-09-05	3	1.1	25	11.03	41	146.341	0	0	0	0
2111	1	2111_1	2111_1_5	2016-09-02	m	1.3	iron1	2016-09-05	3	1.5	27	5.34	41	136.585	0	0	0	0
2111	1	2111_1	2111_1_2	2016-09-02	m	1.4	iron3	2016-09-05	3	1.6	25	2.8	41	185.366	0	0	0	0
2111	1	2111_1	2111_1_8	2016-09-02	w	1.2	iron1	2016-09-05	3	1.4	26	7.37	41	173.171	0	0	0	0
2111	1	2111_1	2111_1_1	2016-09-02	w	1.5	iron3	2016-09-05	3	1.6	24	3.57	41	185.366	0	0	0	0
2111	1	2111_1	2111_1_3	2016-09-02	w	1.4	iron2	2016-09-05	3	1.6	27	8.31	41	148.78	0	0	0	0
2111	1	2111_1	2111_1_7	2016-09-02	m	1.3	iron3	2016-09-05	3	1.4	28	6.68	41	143.902	0	0	0	1
2111	1	2111_1	2111_1_10	2016-09-02	w	1	iron2	2016-09-05	3	1.2	27	10.08	41	158.537	0	0	0	1
2111	1	2111_1	2111_1_6	2016-09-02	w	1.3	iron2	2016-09-05	3	1.6	27	9.99	41	117.073	0	0	0	1
2382	2	2382_2	2382_2_4	2016-10-24	m	1.7	iron2	2016-10-27	3	2	30	6.37	39	292.308	0	0	0	0
2382	2	2382_2	2382_2_6	2016-10-24	m	1.5	iron2	2016-10-27	3	1.8	23	3.79	39	.	0	1	0	0
2382	2	2382_2	2382_2_12	2016-10-24	w	1.1	iron2	2016-10-27	3	1.4	28	4.39	39	225.641	0	0	0	1
2382	2	2382_2	2382_2_7	2016-10-24	w	1.3	iron1	2016-10-27	3	1.5	27	4.87	39	.	0	1	0	0
2382	2	2382_2	2382_2_1	2016-10-24	m	2.1	iron2	2016-10-27	3	2.4	31	2.8	39	.	0	1	0	0
2382	2	2382_2	2382_2_5	2016-10-24	w	1.6	iron2	2016-10-27	3	1.8	24	2.8	39	235.897	0	0	0	1
2382	2	2382_2	2382_2_8	2016-10-24	w	1.2	iron2	2016-10-27	3	1.4	32	10.64	39	187.179	0	0	0	0
2382	2	2382_2	2382_2_3	2016-10-24	m	1.7	iron1	2016-10-27	3	2	33	4.52	39	210.256	0	0	0	1
2382	2	2382_2	2382_2_2	2016-10-24	w	1.8	iron1	2016-10-27	3	1.9	29	5.9	39	266.667	0	0	0	1
2383	2	2383_2	2383_2_3	2016-10-22	w	1.7	iron3	2016-10-25	3	2	30	4.69	41	295.122	0	0	0	0
2383	2	2383_2	2383_2_1	2016-10-22	w	1.9	iron3	2016-10-25	3	2	34	3.19	41	295.122	0	0	0	0
2383	2	2383_2	2383_2_5	2016-10-22	m	1.5	iron3	2016-10-25	3	1.6	32	5.38	41	.	0	1	0	0
2383	2	2383_2	2383_2_2	2016-10-22	m	1.7	iron1	2016-10-25	3	1.9	28	5.81	41	.	1	0	0	0
2383	2	2383_2	2383_2_7	2016-10-22	w	1.4	iron1	2016-10-25	3	1.7	35	12.32	41	209.756	0	0	0	0
2383	2	2383_2	2383_2_10	2016-10-22	m	1.3	iron1	2016-10-25	3	1.5	27	10.68	41	243.902	0	0	0	0
2383	2	2383_2	2383_2_9	2016-10-22	w	1.4	iron2	2016-10-25	3	1.6	26	4.09	41	265.854	0	0	0	0
2383	2	2383_2	2383_2_11	2016-10-22	w	1.3	iron2	2016-10-25	3	1.6	34	4.74	41	329.268	0	0	0	0
2383	2	2383_2	2383_2_4	2016-10-22	m	1.7	iron2	2016-10-25	3	2	26	10.77	41	246.341	0	0	0	0
5014	9	5014_9	5014_9_7	2016-10-20	w	1.6	iron2	2016-10-23	3	1.9	22	3.06	43	227.907	0	0	0	0
5014	9	5014_9	5014_9_5	2016-10-20	w	1.7	iron1	2016-10-23	3	2.1	24	2.54	43	165.116	0	0	0	0
5014	9	5014_9	5014_9_9	2016-10-20	m	1.3	iron3	2016-10-23	3	1.6	13	9.26	43	232.558	0	0	0	0
5014	9	5014_9	5014_9_3	2016-10-20	m	1.8	iron2	2016-10-23	3	2.2	19	3.23	43	348.837	0	0	0	0
5014	9	5014_9	5014_9_1	2016-10-20	w	2.1	iron1	2016-10-23	3	2.2	26	3.19	43	306.977	0	0	0	0
5014	9	5014_9	5014_9_4	2016-10-20	m	1.7	iron2	2016-10-23	3	2.1	24	3.57	43	316.279	0	0	0	0
5014	9	5014_9	5014_9_2	2016-10-20	w	1.8	iron1	2016-10-23	3	2.3	24	2.41	43	190.698	0	0	0	0
5014	9	5014_9	5014_9_6	2016-10-20	m	1.7	iron3	2016-10-23	3	2.1	24	2.58	43	332.558	0	0	0	0
5014	9	5014_9	5014_9_8	2016-10-20	m	1.5	iron3	2016-10-23	3	1.8	24	4.78	43	304.651	0	0	0	0
2381	2	2381_2	2381_2_4	2016-02-14	m	1.5	iron1	2016-02-28	14	.	.	.	.	.	.	.	.	.
2381	2	2381_2	2381_2_7	2016-02-14	w	1.5	iron3	2016-02-28	14	5.6	34	.	.	.	.	.	.	.
2381	2	2381_2	2381_2_9	2016-02-14	w	1.2	iron3	2016-02-28	14	4.4		13.83	.	.	.	.	.	.
2381	2	2381_2	2381_2_2	2016-02-14	m	1.6	iron1	2016-02-28	14	6	26	6.2	.	.	.	.	.	.
2381	2	2381_2	2381_2_1	2016-02-14	m	1.7	iron3	2016-02-28	14	5.3	33	13.35	.	.	.	.	.	.
2381	2	2381_2	2381_2_8	2016-02-14	m	1.4	iron1	2016-02-28	14	4.6	15	13.14	.	.	.	.	.	.
2381	2	2381_2	2381_2_6	2016-02-14	w	1.5	iron2	2016-02-28	14	5.3	34	.	.	.	.	.	.	.
2381	2	2381_2	2381_2_3	2016-02-14	m	1.5	iron2	2016-02-28	14	4.1	.	18.48	.	.	.	.	.	.
2381	2	2381_2	2381_2_5	2016-02-14	m	1.5	iron2	2016-02-28	14	4.3	25	18.31	.	.	.	.	.	.
5533	1	5533_1	5533_1_1	2016-02-15	m	2	iron3	2016-02-28	13	5.4	25	3.79	.	.	.	.	.	.
5533	1	5533_1	5533_1_10	2016-02-15	w	1.4	iron1	2016-02-28	13	4.2	37	11.93	.	.	.	.	.	.
5533	1	5533_1	5533_1_4	2016-02-15	w	1.6	iron3	2016-02-28	13	5.3	36	.	.	.	.	.	.	.
5533	1	5533_1	5533_1_6	2016-02-15	w	1.5	iron1	2016-02-28	13	4.5	38	21.45	.	.	.	.	.	.
5533	1	5533_1	5533_1_5	2016-02-15	w	1.5	iron2	2016-02-28	13	4.9	37	27.65	.	.	.	.	.	.
5533	1	5533_1	5533_1_7	2016-02-15	w	1.5	iron3	2016-02-28	13	4.3	39	19.99	.	.	.	.	.	.
5533	1	5533_1	5533_1_2	2016-02-15	m	1.8	iron2	2016-02-28	13	5.2	35	.	.	.	.	.	.	.
5533	1	5533_1	5533_1_12	2016-02-15	m	1.1	iron2	2016-02-28	13	3.9	28	31.53	.	.	.	.	.	.
5533	1	5533_1	5533_1_8	2016-02-15	w	1.5	iron1	2016-02-28	13	4.5	23	22.74	.	.	.	.	.	.
561	8	561_8	561_8_13	2016-03-02	w	1.2	iron3	2016-03-17	15	4.3	.	17.01	.	.	.	.	.	.
561	8	561_8	561_8_6	2016-03-02	w	1.5	iron2	2016-03-17	15	5.3	.	5.34	.	.	.	.	.	.
561	8	561_8	561_8_12	2016-03-02	w	1.3	iron3	2016-03-17	15	3.8	.	12.23	.	.	.	.	.	.
561	8	561_8	561_8_3	2016-03-02	w	1.9	iron1	2016-03-17	15	6.6	.	5.86	.	.	.	.	.	.
561	8	561_8	561_8_1	2016-03-02	m	2	iron2	2016-03-17	15	6.9	.	4.65	.	.	.	.	.	.
561	8	561_8	561_8_7	2016-03-02	w	1.5	iron3	2016-03-17	15	6	.	4.39	.	.	.	.	.	.
561	8	561_8	561_8_11	2016-03-02	m	1.4	iron2	2016-03-17	15	5.7	.	13.74	.	.	.	.	.	.
561	8	561_8	561_8_9	2016-03-02	w	1.4	iron1	2016-03-17	15	5	.	7.54	.	.	.	.	.	.
561	8	561_8	561_8_5	2016-03-02	m	1.5	iron1	2016-03-17	15	4.8	.	16.07	.	.	.	.	.	.
5526	1	5526_1	5526_1_1	2016-03-03	w	1.5	iron1	2016-03-17	14	4.7	.	12.45	.	.	.	.	.	.
5526	1	5526_1	5526_1_3	2016-03-03	w	1.4	iron3	2016-03-17	14	4.7	.	11.67	.	.	.	.	.	.
5526	1	5526_1	5526_1_4	2016-03-03	w	1.3	iron1	2016-03-17	14	4.5	.	15.46	.	.	.	.	.	.
5526	1	5526_1	5526_1_10	2016-03-03	m	1.1	iron3	2016-03-17	14	4.4	.	14.86	.	.	.	.	.	.
5526	1	5526_1	5526_1_9	2016-03-03	w	1.1	iron2	2016-03-17	14	3.5	.	.	.	.	.	.	.	.
5526	1	5526_1	5526_1_6	2016-03-03	m	1.2	iron3	2016-03-17	14	4.5	.	10.72	.	.	.	.	.	.
5526	1	5526_1	5526_1_8	2016-03-03	m	1.1	iron2	2016-03-17	14	3.8	.	10.9	.	.	.	.	.	.
5526	1	5526_1	5526_1_7	2016-03-03	w	1.2	iron2	2016-03-17	14	4.3	.	10.08	.	.	.	.	.	.
5526	1	5526_1	5526_1_2	2016-03-03	m	1.4	iron1	2016-03-17	14	4.7	.	8.74	.	.	.	.	.	.
2382	1	2382_1	2382_1_6	2016-05-12	w	1.5	iron1	2016-05-26	14	4.4	32	.	.	.	.	.	.	.
2382	1	2382_1	2382_1_2	2016-05-12	m	1.8	iron1	2016-05-26	14	4.8	32	18.48	.	.	.	.	.	.
2382	1	2382_1	2382_1_9	2016-05-12	w	1.2	iron3	2016-05-26	14	3.7	37	29.29	.	.	.	.	.	.
2382	1	2382_1	2382_1_5	2016-05-12	m	1.6	iron2	2016-05-26	14	5.1	35	30.93	.	.	.	.	.	.
2382	1	2382_1	2382_1_3	2016-05-12	w	1.8	iron1	2016-05-26	14	5.2	36	13.35	.	.	.	.	.	.
2382	1	2382_1	2382_1_7	2016-05-12	w	1.3	iron3	2016-05-26	14	4.3	35	5.08	.	.	.	.	.	.
2382	1	2382_1	2382_1_8	2016-05-12	w	1.3	iron2	2016-05-26	14	4.4	36	15.81	.	.	.	.	.	.
2382	1	2382_1	2382_1_4	2016-05-12	w	1.7	iron3	2016-05-26	14	4.3	38	16.07	.	.	.	.	.	.
2382	1	2382_1	2382_1_1	2016-05-12	w	1.9	iron2	2016-05-26	14	4.2	37	24.25	.	.	.	.	.	.
2383	1	2383_1	2383_1_6	2016-05-10	w	1.4	iron2	2016-05-24	14	4.7	33	8.27	.	.	.	.	.	.
2383	1	2383_1	2383_1_3	2016-05-10	m	1.6	iron3	2016-05-24	14	5	33	9.69	.	.	.	.	.	.
2383	1	2383_1	2383_1_7	2016-05-10	w	1.4	iron2	2016-05-24	14	4.6	36	14.52	.	.	.	.	.	.
2383	1	2383_1	2383_1_10	2016-05-10	m	1.3	iron2	2016-05-24	14	4	34	12.1	.	.	.	.	.	.
2383	1	2383_1	2383_1_4	2016-05-10	w	1.6	iron3	2016-05-24	14	4.9	35	17.31	.	.	.	.	.	.
2383	1	2383_1	2383_1_5	2016-05-10	w	1.5	iron3	2016-05-24	14	4.5	36	15.46	.	.	.	.	.	.
2383	1	2383_1	2383_1_2	2016-05-10	w	1.7	iron1	2016-05-24	14	4.9	34	9.73	.	.	.	.	.	.
2383	1	2383_1	2383_1_9	2016-05-10	w	1.3	iron1	2016-05-24	14	3.9	36	20.59	.	.	.	.	.	.
2383	1	2383_1	2383_1_1	2016-05-10	m	1.9	iron1	2016-05-24	14	5	33	13.91	.	.	.	.	.	.
5532	1	5532_1	5532_1_3	2016-05-23	w	1.8	iron2	2016-06-07	15	5.6	36	20.59	.	.	.	.	.	.
5532	1	5532_1	5532_1_5	2016-05-23	m	1.8	iron3	2016-06-07	15	4.9	32	0.82	.	.	.	.	.	.
5532	1	5532_1	5532_1_8	2016-05-23	w	1.7	iron1	2016-06-07	15	5.5	35	24.59	.	.	.	.	.	.
5532	1	5532_1	5532_1_1	2016-05-23	w	1.9	iron3	2016-06-07	15	6	35	16.07	.	.	.	.	.	.
5532	1	5532_1	5532_1_12	2016-05-23	m	1.2	iron1	2016-06-07	15	4.6	37	13.83	.	.	.	.	.	.
5532	1	5532_1	5532_1_2	2016-05-23	w	1.9	iron1	2016-06-07	15	5.9	35	23.3	.	.	.	.	.	.
5532	1	5532_1	5532_1_11	2016-05-23	m	1.4	iron2	2016-06-07	15	4.5	34	29.2	.	.	.	.	.	.
5532	1	5532_1	5532_1_9	2016-05-23	w	1.4	iron3	2016-06-07	15	5	34	20.07	.	.	.	.	.	.
5532	1	5532_1	5532_1_7	2016-05-23	w	1.7	iron2	2016-06-07	15	5	34	24.85	.	.	.	.	.	.
5014	8	5014_8	5014_8_8	2016-05-15	w	1.8	iron1	2016-05-30	15	5.8	37	5.64	.	.	.	.	.	.
5014	8	5014_8	5014_8_3	2016-05-15	w	2.2	iron1	2016-05-30	15	6.8	37	6.93	.	.	.	.	.	.
5014	8	5014_8	5014_8_7	2016-05-15	w	1.8	iron1	2016-05-30	15	5.7	38	13.09	.	.	.	.	.	.
5014	8	5014_8	5014_8_1	2016-05-15	w	2.2	iron2	2016-05-30	15	6.6	35	9.6	.	.	.	.	.	.
5014	8	5014_8	5014_8_6	2016-05-15	w	2	iron2	2016-05-30	15	6.7	38	8.1	.	.	.	.	.	.
5014	8	5014_8	5014_8_11	2016-05-15	w	1.6	iron3	2016-05-30	15	4.8	42	14.56	.	.	.	.	.	.
5014	8	5014_8	5014_8_4	2016-05-15	w	2.1	iron3	2016-05-30	15	6.4	38	12.4	.	.	.	.	.	.
5014	8	5014_8	5014_8_5	2016-05-15	w	1.9	iron2	2016-05-30	15	6.2	38	14.26	.	.	.	.	.	.
5014	8	5014_8	5014_8_10	2016-05-15	m	1.6	iron3	2016-05-30	15	4.1	39	30.67	.	.	.	.	.	.
48241	1	48241_1	48241_1_9	2016-06-04	m	1.1	iron3	2016-06-17	13	3.2	38	28.13	.	.	.	.	.	.
48241	1	48241_1	48241_1_7	2016-06-04	m	1.1	iron1	2016-06-17	13	2.6	23	1.51	.	.	.	.	.	.
48241	1	48241_1	48241_1_12	2016-06-04	w	0.7	iron2	2016-06-17	13	2.4	36	46.86	.	.	.	.	.	.
48241	1	48241_1	48241_1_4	2016-06-04	w	1.1	iron3	2016-06-17	13	2.6	37	40.44	.	.	.	.	.	.
48241	1	48241_1	48241_1_8	2016-06-04	m	1.1	iron2	2016-06-17	13	3	36	29.72	.	.	.	.	.	.
48241	1	48241_1	48241_1_1	2016-06-04	m	1.3	iron3	2016-06-17	13	3.3	39	34.03	.	.	.	.	.	.
48241	1	48241_1	48241_1_3	2016-06-04	w	1.2	iron2	2016-06-17	13	3.2	35	37.56	.	.	.	.	.	.
48241	1	48241_1	48241_1_2	2016-06-04	m	1.2	iron1	2016-06-17	13	3	39	27.35	.	.	.	.	.	.
48241	1	48241_1	48241_1_5	2016-06-04	w	1.1	iron1	2016-06-17	13	3.1	37	41.91	.	.	.	.	.	.
51932	3	51932_3	51932_3_7	2016-06-16	m	1.2	iron1	2016-06-30	14	4.5	37	36.91	.	.	.	.	.	.
51932	3	51932_3	51932_3_9	2016-06-16	m	1.1	iron3	2016-06-30	14	4.3	31	24.42	.	.	.	.	.	.
51932	3	51932_3	51932_3_10	2016-06-16	w	1.1	iron3	2016-06-30	14	.	.	.	.	.	.	.	.	.
51932	3	51932_3	51932_3_8	2016-06-16	w	1.2	iron1	2016-06-30	14	5.2	39	30.54	.	.	.	.	.	.
51932	3	51932_3	51932_3_3	2016-06-16	w	1.3	iron3	2016-06-30	14	5.3	.	15.25	.	.	.	.	.	.
51932	3	51932_3	51932_3_2	2016-06-16	m	1.6	iron1	2016-06-30	14	5.6	38	16.67	.	.	.	.	.	.
51932	3	51932_3	51932_3_5	2016-06-16	m	1.3	iron2	2016-06-30	14	3.1	33	12.92	.	.	.	.	.	.
51932	3	51932_3	51932_3_6	2016-06-16	w	1.3	iron2	2016-06-30	14	4.3	37	26.7	.	.	.	.	.	.
51932	3	51932_3	51932_3_4	2016-06-16	w	1.3	iron2	2016-06-30	14	3.6	34	15.94	.	.	.	.	.	.
51941	3	51941_3	51941_3_7	2016-06-16	w	1	iron1	2016-06-30	14	3.4	39	43.46	.	.	.	.	.	.
51941	3	51941_3	51941_3_4	2016-06-16	w	1.3	iron1	2016-06-30	14	4.3	39	21.92	.	.	.	.	.	.
51941	3	51941_3	51941_3_2	2016-06-16	w	1.4	iron3	2016-06-30	14	4.8	38	16.37	.	.	.	.	.	.
51941	3	51941_3	51941_3_9	2016-06-16	m	0.8	iron1	2016-06-30	14	4	35	36.14	.	.	.	.	.	.
51941	3	51941_3	51941_3_3	2016-06-16	w	1.3	iron2	2016-06-30	14	5.1	38	21.41	.	.	.	.	.	.
51941	3	51941_3	51941_3_8	2016-06-16	w	0.9	iron2	2016-06-30	14	3.9	40	23.09	.	.	.	.	.	.
51941	3	51941_3	51941_3_10	2016-06-16	m	0.8	iron2	2016-06-30	14	.	.	.	.	.	.	.	.	.
51941	3	51941_3	51941_3_5	2016-06-16	m	1.2	iron3	2016-06-30	14	4.5	36	27.22	.	.	.	.	.	.
51941	3	51941_3	51941_3_6	2016-06-16	w	1.1	iron3	2016-06-30	14	.	.	.	.	.	.	.	.	.
564	6	564_6	564_6_2	2016-03-18	m	2.2	iron3	2016-03-31	13	6.6	33	10.08	.	.	.	.	.	.
564	6	564_6	564_6_3	2016-03-18	m	2.2	iron2	2016-03-31	13	6.7	36	11.46	.	.	.	.	.	.
564	6	564_6	564_6_4	2016-03-18	m	2.2	iron2	2016-03-31	13	6.7	29	8.79	.	.	.	.	.	.
564	6	564_6	564_6_1	2016-03-18	w	2.4	iron3	2016-03-31	13	5.6	37	17.23	.	.	.	.	.	.
564	6	564_6	564_6_11	2016-03-18	w	1.1	iron2	2016-03-31	13	4.7	37	25.8	.	.	.	.	.	.
564	6	564_6	564_6_5	2016-03-18	w	1.2	iron3	2016-03-31	13	6.7	35	10.21	.	.	.	.	.	.
564	6	564_6	564_6_6	2016-03-18	w	2.1	iron1	2016-03-31	13	7.2	32	7.37	.	.	.	.	.	.
564	6	564_6	564_6_7	2016-03-18	w	1.9	iron1	2016-03-31	13	5.6	25	21.62	.	.	.	.	.	.
564	6	564_6	564_6_8	2016-03-18	m	1.4	iron1	2016-03-31	13	5	37	23.65	.	.	.	.	.	.
562	8	562_8	562_8_3	2016-04-29	m	1.5	iron1	2016-05-11	12	3.2	35	27.78	.	.	.	.	.	.
562	8	562_8	562_8_6	2016-04-29	w	1.3	iron3	2016-05-11	12	4.2	36	21.49	.	.	.	.	.	.
562	8	562_8	562_8_7	2016-04-29	w	1.3	iron3	2016-05-11	12	4.4	36	10.21	.	.	.	.	.	.
562	8	562_8	562_8_8	2016-04-29	w	1.3	iron1	2016-05-11	12	3.9	39	15.63	.	.	.	.	.	.
562	8	562_8	562_8_9	2016-04-29	w	1.3	iron3	2016-05-11	12	4.4	37	13.91	.	.	.	.	.	.
562	8	562_8	562_8_10	2016-04-29	w	1.3	iron1	2016-05-11	12	2.8	40	25.71	.	.	.	.	.	.
562	8	562_8	562_8_11	2016-04-29	w	1.3	iron2	2016-05-11	12	4.5	33	8.57	.	.	.	.	.	.
562	8	562_8	562_8_12	2016-04-29	w	1.2	iron2	2016-05-11	12	4	28	15.2	.	.	.	.	.	.
562	8	562_8	562_8_13	2016-04-29	m	1.2	iron2	2016-05-11	12	3.8	35	23.34	.	.	.	.	.	.
544	3	544_3	544_3_9	2016-04-26	w	1.5	iron1	2016-05-11	15	5.1	33	6.03	.	.	.	.	.	.
544	3	544_3	544_3_12	2016-04-26	w	1.3	iron1	2016-05-11	15	5.5	33	12.49	.	.	.	.	.	.
544	3	544_3	544_3_8	2016-04-26	m	1.5	iron3	2016-05-11	15	5	32	7.71	.	.	.	.	.	.
544	3	544_3	544_3_11	2016-04-26	w	1.4	iron1	2016-05-11	15	5.4	36	11.5	.	.	.	.	.	.
544	3	544_3	544_3_15	2016-04-26	m	0.9	iron3	2016-05-11	15	2.8	36	20.46	.	.	.	.	.	.
544	3	544_3	544_3_13	2016-04-26	m	1.1	iron3	2016-05-11	15	.	.	.	.	.	.	.	.	.
544	3	544_3	544_3_10	2016-04-26	w	1.4	iron2	2016-05-11	15	5.2	32	6.76	.	.	.	.	.	.
544	3	544_3	544_3_7	2016-04-26	w	1.6	iron2	2016-05-11	15	6.3	24	2.63	.	.	.	.	.	.
544	3	544_3	544_3_6	2016-04-26	m	1.8	iron2	2016-05-11	15	6.3	33	5.43	.	.	.	.	.	.
2381	3	2381_3	2381_3_6	2016-07-28	w	1.5	iron3	2016-08-11	14	4.8	37	30.11	.	.	.	.	.	.
2381	3	2381_3	2381_3_9	2016-07-28	w	1.5	iron3	2016-08-11	14	5.3	35	12.4	.	.	.	.	.	.
2381	3	2381_3	2381_3_12	2016-07-28	w	1.3	iron2	2016-08-11	14	4.3	31	6.25	.	.	.	.	.	.
2381	3	2381_3	2381_3_11	2016-07-28	m	1.4	iron3	2016-08-11	14	3.7	34	15.16	.	.	.	.	.	.
2381	3	2381_3	2381_3_7	2016-07-28	m	1.5	iron2	2016-08-11	14	4.9	37	15.72	.	.	.	.	.	.
2381	3	2381_3	2381_3_1	2016-07-28	m	1.7	iron2	2016-08-11	14	4.2	32	16.15	.	.	.	.	.	.
2381	3	2381_3	2381_3_10	2016-07-28	m	1.5	iron1	2016-08-11	14	4.3	37	22.48	.	.	.	.	.	.
2381	3	2381_3	2381_3_4	2016-07-28	w	1.6	iron1	2016-08-11	14	5	33	14.13	.	.	.	.	.	.
2381	3	2381_3	2381_3_5	2016-07-28	w	1.6	iron1	2016-08-11	14	5.3	35	13.48	.	.	.	.	.	.
51931	8	51931_8	51931_8_2	2016-07-29	m	1.7	iron3	2016-08-11	13	5.1	37	22.31	.	.	.	.	.	.
51931	8	51931_8	51931_8_12	2016-07-29	w	1.4	iron3	2016-08-11	13	4.1	38	28.38	.	.	.	.	.	.
51931	8	51931_8	51931_8_6	2016-07-29	m	1.6	iron2	2016-08-11	13	5.2	40	28.38	.	.	.	.	.	.
51931	8	51931_8	51931_8_7	2016-07-29	w	1.6	iron3	2016-08-11	13	5.9	39	12.32	.	.	.	.	.	.
51931	8	51931_8	51931_8_4	2016-07-29	m	1.6	iron2	2016-08-11	13	5.1	37	27.09	.	.	.	.	.	.
51931	8	51931_8	51931_8_9	2016-07-29	m	1.5	iron2	2016-08-11	13	5.3	39	31.01	.	.	.	.	.	.
51931	8	51931_8	51931_8_10	2016-07-29	m	1.4	iron1	2016-08-11	13	4.9	37	32.43	.	.	.	.	.	.
51931	8	51931_8	51931_8_3	2016-07-29	m	1.7	iron1	2016-08-11	13	5	36	27.74	.	.	.	.	.	.
51931	8	51931_8	51931_8_1	2016-07-29	m	1.8	iron1	2016-08-11	13	5.4	35	8.18	.	.	.	.	.	.
5533	2	5533_2	5533_2_3	2016-07-28	m	1.8	iron2	2016-08-11	14	5.7	43	10.42	.	.	.	.	.	.
5533	2	5533_2	5533_2_11	2016-07-28	m	1.3	iron2	2016-08-11	14	4	29	12.15	.	.	.	.	.	.
5533	2	5533_2	5533_2_2	2016-07-28	m	1.8	iron2	2016-08-11	14	5.2	35	13.61	.	.	.	.	.	.
5533	2	5533_2	5533_2_6	2016-07-28	m	1.5	iron1	2016-08-11	14	4	36	25.63	.	.	.	.	.	.
5533	2	5533_2	5533_2_10	2016-07-28	w	1.3	iron1	2016-08-11	14	4.2	37	24.21	.	.	.	.	.	.
5533	2	5533_2	5533_2_8	2016-07-28	m	1.5	iron1	2016-08-11	14	4.7	34	8.83	.	.	.	.	.	.
5533	2	5533_2	5533_2_5	2016-07-28	w	1.6	iron3	2016-08-11	14	5.2	37	16.15	.	.	.	.	.	.
5533	2	5533_2	5533_2_1	2016-07-28	m	1.9	iron3	2016-08-11	14	5.8	32	8.74	.	.	.	.	.	.
5533	2	5533_2	5533_2_4	2016-07-28	w	1.7	iron3	2016-08-11	14	5.4	36	12.45	.	.	.	.	.	.
5524	7	5524_7	5524_7_1	2016-08-01	m	2.2	iron1	2016-08-16	15	3.4	29	3.19	.	.	.	.	.	.
5524	7	5524_7	5524_7_9	2016-08-01	w	0.9	iron3	2016-08-16	15	.	.	.	.	.	.	.	.	.
5524	7	5524_7	5524_7_8	2016-08-01	m	1.6	iron2	2016-08-16	15	4.2	22	2.37	.	.	.	.	.	.
5524	7	5524_7	5524_7_3	2016-08-01	w	1.9	iron3	2016-08-16	15	3.9	21	2.46	.	.	.	.	.	.
5524	7	5524_7	5524_7_7	2016-08-01	w	1.7	iron2	2016-08-16	15	3.9	23	1.72	.	.	.	.	.	.
5524	7	5524_7	5524_7_5	2016-08-01	w	1.9	iron1	2016-08-16	15	2.9	22	2.37	.	.	.	.	.	.
5524	7	5524_7	5524_7_4	2016-08-01	m	1.9	iron2	2016-08-16	15	2.6	19	.	.	.	.	.	.	.
5524	7	5524_7	5524_7_6	2016-08-01	w	1.8	iron1	2016-08-16	15	3.3	20	1.68	.	.	.	.	.	.
5524	7	5524_7	5524_7_2	2016-08-01	w	2	iron3	2016-08-16	15	4.9	18	2.2	.	.	.	.	.	.
48242	1	48242_1	48242_1_2	2016-08-03	m	1.4	iron2	2016-08-16	13	3.6	35	10.42	.	.	.	.	.	.
48242	1	48242_1	48242_1_6	2016-08-03	w	1.1	iron2	2016-08-16	13	3.3	38	12.15	.	.	.	.	.	.
48242	1	48242_1	48242_1_1	2016-08-03	w	1.4	iron2	2016-08-16	13	3.4	38	13.61	.	.	.	.	.	.
48242	1	48242_1	48242_1_7	2016-08-03	w	1.1	iron1	2016-08-16	13	2.9	36	25.63	.	.	.	.	.	.
48242	1	48242_1	48242_1_9	2016-08-03	w	0.9	iron1	2016-08-16	13	2.9	37	24.21	.	.	.	.	.	.
48242	1	48242_1	48242_1_5	2016-08-03	w	1.2	iron1	2016-08-16	13	3.2	37	8.83	.	.	.	.	.	.
48242	1	48242_1	48242_1_8	2016-08-03	m	1	iron3	2016-08-16	13	2.9	38	44.67	.	.	.	.	.	.
48242	1	48242_1	48242_1_3	2016-08-03	m	1.2	iron3	2016-08-16	13	3.4	34	10.64	.	.	.	.	.	.
48242	1	48242_1	48242_1_4	2016-08-03	m	1.2	iron3	2016-08-16	13	3.4	37	23.04	.	.	.	.	.	.
48243	1	48243_1	48243_1_11	2016-08-09	m	1.3	iron1	2016-08-23	14	4.1	41	34.67	.	.	.	.	.	.
48243	1	48243_1	48243_1_2	2016-08-09	w	1.6	iron2	2016-08-23	14	4.5	38	16.45	.	.	.	.	.	.
48243	1	48243_1	48243_1_5	2016-08-09	w	1.6	iron1	2016-08-23	14	4.9	34	12.36	.	.	.	.	.	.
48243	1	48243_1	48243_1_9	2016-08-09	w	1.4	iron1	2016-08-23	14	4.6	38	28.38	.	.	.	.	.	.
48243	1	48243_1	48243_1_3	2016-08-09	m	1.6	iron2	2016-08-23	14	4.8	35	16.84	.	.	.	.	.	.
48243	1	48243_1	48243_1_10	2016-08-09	w	1.4	iron2	2016-08-23	14	4.2	37	33.21	.	.	.	.	.	.
48243	1	48243_1	48243_1_1	2016-08-09	m	1.8	iron3	2016-08-23	14	4.7	34	7.32	.	.	.	.	.	.
48243	1	48243_1	48243_1_4	2016-08-09	w	1.6	iron3	2016-08-23	14	5.1	30	10.08	.	.	.	.	.	.
48243	1	48243_1	48243_1_8	2016-08-09	m	1.4	iron3	2016-08-23	14	4.6	37	12.66	.	.	.	.	.	.
5526	2	5526_2	5526_2_10	2016-08-13	w	1.8	iron1	2016-08-26	13	4.6	39	21.54	.	.	.	.	.	.
5526	2	5526_2	5526_2_5	2016-08-13	w	2	iron3	2016-08-26	13	6	36	7.8	.	.	.	.	.	.
5526	2	5526_2	5526_2_4	2016-08-13	w	2.1	iron3	2016-08-26	13	5.1	36	9.17	.	.	.	.	.	.
5526	2	5526_2	5526_2_12	2016-08-13	m	1.4	iron1	2016-08-26	13	4.3	27	21.06	.	.	.	.	.	.
5526	2	5526_2	5526_2_6	2016-08-13	w	2	iron3	2016-08-26	13	5	38	21.23	.	.	.	.	.	.
5526	2	5526_2	5526_2_9	2016-08-13	w	1.8	iron1	2016-08-26	13	5.4	35	6.33	.	.	.	.	.	.
5526	2	5526_2	5526_2_1	2016-08-13	w	2.2	iron2	2016-08-26	13	5.3	37	27.91	.	.	.	.	.	.
5526	2	5526_2	5526_2_7	2016-08-13	w	1.9	iron2	2016-08-26	13	5.2	36	11.41	.	.	.	.	.	.
5526	2	5526_2	5526_2_2	2016-08-13	m	2.2	iron2	2016-08-26	13	6.2	37	5.73	.	.	.	.	.	.
543	3	543_3	543_3_1	2016-10-19	w	2	iron2	2016-11-02	14	6.5	35	11.35	.	.	.	.	.	.
543	3	543_3	543_3_10	2016-10-19	w	1.3	iron1	2016-11-02	14	4.5	39	4.82	.	.	.	.	.	.
543	3	543_3	543_3_2	2016-10-19	w	1.7	iron1	2016-11-02	14	5.9	38	7.93	.	.	.	.	.	.
543	3	543_3	543_3_11	2016-10-19	w	1.2	iron2	2016-11-02	14	4.5	32	6.12	.	.	.	.	.	.
543	3	543_3	543_3_9	2016-10-19	m	1.3	iron1	2016-11-02	14	4.6	35	7.54	.	.	.	.	.	.
543	3	543_3	543_3_8	2016-10-19	m	1.3	iron2	2016-11-02	14	4	34	10.81	.	.	.	.	.	.
543	3	543_3	543_3_5	2016-10-19	w	1.5	iron3	2016-11-02	14	5.7	37	12.06	.	.	.	.	.	.
543	3	543_3	543_3_6	2016-10-19	w	1.4	iron3	2016-11-02	14	5.1	35	6.42	.	.	.	.	.	.
543	3	543_3	543_3_4	2016-10-19	w	1.6	iron3	2016-11-02	14	4.8	33	9.39	.	.	.	.	.	.
544	4	544_4	544_4_2	2016-10-07	w	1.6	iron1	2016-10-20	13	6.6	36	21.62	.	.	.	.	.	.
544	4	544_4	544_4_5	2016-10-07	m	1.3	iron3	2016-10-20	13	5.2	37	11.2	.	.	.	.	.	.
544	4	544_4	544_4_1	2016-10-07	m	1.9	iron1	2016-10-20	13	4.7	33	27.57	.	.	.	.	.	.
544	4	544_4	544_4_9	2016-10-07	m	1	iron1	2016-10-20	13	3.6	37	24.16	.	.	.	.	.	.
544	4	544_4	544_4_8	2016-10-07	m	1.1	iron3	2016-10-20	13	4.5	34	23.78	.	.	.	.	.	.
544	4	544_4	544_4_4	2016-10-07	m	1.4	iron2	2016-10-20	13	5	35	18.52	.	.	.	.	.	.
544	4	544_4	544_4_6	2016-10-07	w	1.2	iron3	2016-10-20	13	4	35	29.46	.	.	.	.	.	.
544	4	544_4	544_4_7	2016-10-07	m	1.2	iron2	2016-10-20	13	3.4	17	2.2	.	.	.	.	.	.
544	4	544_4	544_4_3	2016-10-07	m	1.6	iron2	2016-10-20	13	5.3	32	9.13	.	.	.	.	.	.
561	9	561_9	561_9_4	2016-09-01	w	1.5	iron2	2016-09-15	14	4.8	34	4.91	.	.	.	.	.	.
561	9	561_9	561_9_11	2016-09-01	w	1.2	iron3	2016-09-15	14	4.1	44	27.35	.	.	.	.	.	.
561	9	561_9	561_9_2	2016-09-01	w	1.5	iron2	2016-09-15	14	5.2	35	10.04	.	.	.	.	.	.
561	9	561_9	561_9_5	2016-09-01	m	1.5	iron3	2016-09-15	14	4.8	25	11.24	.	.	.	.	.	.
561	9	561_9	561_9_1	2016-09-01	w	1.6	iron3	2016-09-15	14	5.1	34	7.32	.	.	.	.	.	.
561	9	561_9	561_9_7	2016-09-01	w	1.4	iron2	2016-09-15	14	4.3	40	33.25	.	.	.	.	.	.
561	9	561_9	561_9_8	2016-09-01	m	1.3	iron1	2016-09-15	14	4.6	39	25.5	.	.	.	.	.	.
561	9	561_9	561_9_13	2016-09-01	m	1.2	iron1	2016-09-15	14	3.2	37	27.01	.	.	.	.	.	.
561	9	561_9	561_9_3	2016-09-01	w	1.5	iron1	2016-09-15	14	4.2	40	17.57	.	.	.	.	.	.
562	9	562_9	562_9_4	2016-10-06	w	1.6	iron1	2016-10-20	14	5	38	26.96	.	.	.	.	.	.
562	9	562_9	562_9_3	2016-10-06	w	1.8	iron1	2016-10-20	14	5.6	37	24.25	.	.	.	.	.	.
562	9	562_9	562_9_8	2016-10-06	w	1.4	iron2	2016-10-20	14	4.5	37	22.7	.	.	.	.	.	.
562	9	562_9	562_9_2	2016-10-06	w	1.9	iron2	2016-10-20	14	5.6	37	11.89	.	.	.	.	.	.
562	9	562_9	562_9_5	2016-10-06	m	1.6	iron3	2016-10-20	14	4.9	37	11.28	.	.	.	.	.	.
562	9	562_9	562_9_6	2016-10-06	m	1.4	iron1	2016-10-20	14	4.3	36	18.69	.	.	.	.	.	.
562	9	562_9	562_9_7	2016-10-06	m	1.4	iron2	2016-10-20	14	4.9	37	26.96	.	.	.	.	.	.
562	9	562_9	562_9_11	2016-10-06	w	1.3	iron3	2016-10-20	14	4.9	37	10.42	.	.	.	.	.	.
562	9	562_9	562_9_1	2016-10-06	w	1.9	iron3	2016-10-20	14	6.1	37	17.83	.	.	.	.	.	.
1911	7	1911_7	1911_7_4	2016-10-07	m	1.8	iron3	2016-10-20	13	5.7	33	9.09	.	.	.	.	.	.
1911	7	1911_7	1911_7_7	2016-10-07	w	1.3	iron3	2016-10-20	13	4.1	34	28.51	.	.	.	.	.	.
1911	7	1911_7	1911_7_1	2016-10-07	m	2	iron3	2016-10-20	13	6	34	5.13	.	.	.	.	.	.
1911	7	1911_7	1911_7_3	2016-10-07	w	1.8	iron2	2016-10-20	13	4.5	37	26.14	.	.	.	.	.	.
1911	7	1911_7	1911_7_2	2016-10-07	w	1.8	iron2	2016-10-20	13	5.4	39	12.66	.	.	.	.	.	.
1911	7	1911_7	1911_7_5	2016-10-07	w	1.7	iron2	2016-10-20	13	5	37	12.19	.	.	.	.	.	.
1911	7	1911_7	1911_7_10	2016-10-07	w	1.8	iron1	2016-10-20	13	4.9	34	6.68	.	.	.	.	.	.
1911	7	1911_7	1911_7_8	2016-10-07	w	1.1	iron1	2016-10-20	13	3.3	38	29.03	.	.	.	.	.	.
1911	7	1911_7	1911_7_6	2016-10-07	m	1.5	iron1	2016-10-20	13	5.4	36	9.04	.	.	.	.	.	.
1913	1	1913_1	1913_1_2	2016-10-10	m	1.2	iron1	2016-10-24	14	4.2	37	20.89	.	.	.	.	.	.
1913	1	1913_1	1913_1_6	2016-10-10	m	1.1	iron2	2016-10-24	14	3.1	15	2.15	.	.	.	.	.	.
1913	1	1913_1	1913_1_7	2016-10-10	m	1	iron3	2016-10-24	14	3.5	13	2.02	.	.	.	.	.	.
1913	1	1913_1	1913_1_5	2016-10-10	w	1.1	iron1	2016-10-24	14	4	38	25.46	.	.	.	.	.	.
1913	1	1913_1	1913_1_1	2016-10-10	m	1.4	iron2	2016-10-24	14	4.5	35	7.06	.	.	.	.	.	.
1913	1	1913_1	1913_1_4	2016-10-10	m	1.2	iron1	2016-10-24	14	4	41	31.23	.	.	.	.	.	.
1913	1	1913_1	1913_1_10	2016-10-10	m	1	iron2	2016-10-24	14	3.4	35	7.19	.	.	.	.	.	.
1913	1	1913_1	1913_1_3	2016-10-10	w	1.2	iron3	2016-10-24	14	4.3	37	9.13	.	.	.	.	.	.
1913	1	1913_1	1913_1_9	2016-10-10	w	1	iron3	2016-10-24	14	3.7	38	13.09	.	.	.	.	.	.
1915	2	1915_2	1915_2_2	2016-10-19	w	1.7	iron1	2016-11-02	14	4.5	32	6.5	.	.	.	.	.	.
1915	2	1915_2	1915_2_3	2016-10-19	m	1.5	iron1	2016-11-02	14	5	35	13.65	.	.	.	.	.	.
1915	2	1915_2	1915_2_1	2016-10-19	w	1.8	iron1	2016-11-02	14	5.2	38	8.74	.	.	.	.	.	.
1915	2	1915_2	1915_2_7	2016-10-19	w	1.3	iron3	2016-11-02	14	4.1	39	16.37	.	.	.	.	.	.
1915	2	1915_2	1915_2_9	2016-10-19	w	1.3	iron3	2016-11-02	14	4.3	32	6.37	.	.	.	.	.	.
1915	2	1915_2	1915_2_10	2016-10-19	m	1.3	iron3	2016-11-02	14	4.5	35	17.92	.	.	.	.	.	.
1915	2	1915_2	1915_2_4	2016-10-19	m	1.5	iron2	2016-11-02	14	4.5	37	6.33	.	.	.	.	.	.
1915	2	1915_2	1915_2_5	2016-10-19	m	1.4	iron2	2016-11-02	14	4.4	36	8.57	.	.	.	.	.	.
1915	2	1915_2	1915_2_6	2016-10-19	w	1.3	iron2	2016-11-02	14	4.5	35	17.36	.	.	.	.	.	.
2111	1	2111_1	2111_1_13	2016-09-02	w	0.9	iron1	2016-09-15	13	2.8	37	28.13	.	.	.	.	.	.
2111	1	2111_1	2111_1_5	2016-09-02	m	1.3	iron1	2016-09-15	13	3.1	37	21.32	.	.	.	.	.	.
2111	1	2111_1	2111_1_2	2016-09-02	m	1.4	iron3	2016-09-15	13	3.5	36	20.8	.	.	.	.	.	.
2111	1	2111_1	2111_1_8	2016-09-02	w	1.2	iron1	2016-09-15	13	3	37	23.43	.	.	.	.	.	.
2111	1	2111_1	2111_1_1	2016-09-02	w	1.5	iron3	2016-09-15	13	3.5	38	25.63	.	.	.	.	.	.
2111	1	2111_1	2111_1_3	2016-09-02	w	1.4	iron2	2016-09-15	13	3.3	34	19.73	.	.	.	.	.	.
2111	1	2111_1	2111_1_7	2016-09-02	m	1.3	iron3	2016-09-15	13	2.7	34	21.49	.	.	.	.	.	.
2111	1	2111_1	2111_1_10	2016-09-02	w	1	iron2	2016-09-15	13	2.8	36	30.75	.	.	.	.	.	.
2111	1	2111_1	2111_1_6	2016-09-02	w	1.3	iron2	2016-09-15	13	3.3	36	23.34	.	.	.	.	.	.
2382	2	2382_2	2382_2_4	2016-10-24	m	1.7	iron2	2016-11-07	14	4.4	39	18.82	.	.	.	.	.	.
2382	2	2382_2	2382_2_6	2016-10-24	m	1.5	iron2	2016-11-07	14	4.3	38	32.95	.	.	.	.	.	.
2382	2	2382_2	2382_2_12	2016-10-24	w	1.1	iron2	2016-11-07	14	3.3	38	26.32	.	.	.	.	.	.
2382	2	2382_2	2382_2_7	2016-10-24	w	1.3	iron1	2016-11-07	14	4.1	36	28.69	.	.	.	.	.	.
2382	2	2382_2	2382_2_1	2016-10-24	m	2.1	iron2	2016-11-07	14	5.5	37	20.07	.	.	.	.	.	.
2382	2	2382_2	2382_2_5	2016-10-24	w	1.6	iron2	2016-11-07	14	4.2	37	23.04	.	.	.	.	.	.
2382	2	2382_2	2382_2_8	2016-10-24	w	1.2	iron2	2016-11-07	14	3.4	37	19.99	.	.	.	.	.	.
2382	2	2382_2	2382_2_3	2016-10-24	m	1.7	iron1	2016-11-07	14	4.5	38	21.23	.	.	.	.	.	.
2382	2	2382_2	2382_2_2	2016-10-24	w	1.8	iron1	2016-11-07	14	4.2	36	25.28	.	.	.	.	.	.
2383	2	2383_2	2383_2_3	2016-10-22	w	1.7	iron3	2016-11-04	13	4.7	33	.	.	.	.	.	.	.
2383	2	2383_2	2383_2_1	2016-10-22	w	1.9	iron3	2016-11-04	13	4.9	37	17.83	.	.	.	.	.	.
2383	2	2383_2	2383_2_5	2016-10-22	m	1.5	iron3	2016-11-04	13	3.9	35	12.62	.	.	.	.	.	.
2383	2	2383_2	2383_2_2	2016-10-22	m	1.7	iron1	2016-11-04	13	.	.	.	.	.	.	.	.	.
2383	2	2383_2	2383_2_7	2016-10-22	w	1.4	iron1	2016-11-04	13	4.2	38	39.5	.	.	.	.	.	.
2383	2	2383_2	2383_2_10	2016-10-22	m	1.3	iron1	2016-11-04	13	3.1	34	29.5	.	.	.	.	.	.
2383	2	2383_2	2383_2_9	2016-10-22	w	1.4	iron2	2016-11-04	13	3.6	37	25.71	.	.	.	.	.	.
2383	2	2383_2	2383_2_11	2016-10-22	w	1.3	iron2	2016-11-04	13	4.4	35	15.03	.	.	.	.	.	.
2383	2	2383_2	2383_2_4	2016-10-22	m	1.7	iron2	2016-11-04	13	4.8	33	19.21	.	.	.	.	.	.
5014	9	5014_9	5014_9_7	2016-10-20	w	1.6	iron2	2016-11-04	15	5.2	37	7.58	.	.	.	.	.	.
5014	9	5014_9	5014_9_5	2016-10-20	w	1.7	iron1	2016-11-04	15	4.8	37	13.18	.	.	.	.	.	.
5014	9	5014_9	5014_9_9	2016-10-20	m	1.3	iron3	2016-11-04	15	4.1	37	16.07	.	.	.	.	.	.
5014	9	5014_9	5014_9_3	2016-10-20	m	1.8	iron2	2016-11-04	15	5.7	35	7.19	.	.	.	.	.	.
5014	9	5014_9	5014_9_1	2016-10-20	w	2.1	iron1	2016-11-04	15	3.9	43	26.83	.	.	.	.	.	.
5014	9	5014_9	5014_9_4	2016-10-20	m	1.7	iron2	2016-11-04	15	5.3	27	3.92	.	.	.	.	.	.
5014	9	5014_9	5014_9_2	2016-10-20	w	1.8	iron1	2016-11-04	15	6.2	36	6.85	.	.	.	.	.	.
5014	9	5014_9	5014_9_6	2016-10-20	m	1.7	iron3	2016-11-04	15	5.5	28	7.45	.	.	.	.	.	.
5014	9	5014_9	5014_9_8	2016-10-20	m	1.5	iron3	2016-11-04	15	4.7	37	12.58	.	.	.	.	.	.
2381	2	2381_2	2381_2_4	2016-02-14	m	1.5	iron1	2016-03-09	24	.	.	.	.	.	.	.	.	.
2381	2	2381_2	2381_2_7	2016-02-14	w	1.5	iron3	2016-03-09	24	8.5	.	3.49	.	.	.	.	.	.
2381	2	2381_2	2381_2_9	2016-02-14	w	1.2	iron3	2016-03-09	24	5.9	.	4.61	.	.	.	.	.	.
2381	2	2381_2	2381_2_2	2016-02-14	m	1.6	iron1	2016-03-09	24	9	.	15.38	.	.	.	.	.	.
2381	2	2381_2	2381_2_1	2016-02-14	m	1.7	iron3	2016-03-09	24	8	.	28.51	.	.	.	.	.	.
2381	2	2381_2	2381_2_8	2016-02-14	m	1.4	iron1	2016-03-09	24	7.3	.	5.73	.	.	.	.	.	.
2381	2	2381_2	2381_2_6	2016-02-14	w	1.5	iron2	2016-03-09	24	6.6	.	21.66	.	.	.	.	.	.
2381	2	2381_2	2381_2_3	2016-02-14	m	1.5	iron2	2016-03-09	24	6.3	.	34.11	.	.	.	.	.	.
2381	2	2381_2	2381_2_5	2016-02-14	m	1.5	iron2	2016-03-09	24	6.6	.	36.31	.	.	.	.	.	.
5533	1	5533_1	5533_1_1	2016-02-15	m	2	iron3	2016-03-09	23	8.8	.	7.32	.	.	.	.	.	.
5533	1	5533_1	5533_1_10	2016-02-15	w	1.4	iron1	2016-03-09	23	6.4	.	11.24	.	.	.	.	.	.
5533	1	5533_1	5533_1_4	2016-02-15	w	1.6	iron3	2016-03-09	23	8.4	.	25.46	.	.	.	.	.	.
5533	1	5533_1	5533_1_6	2016-02-15	w	1.5	iron1	2016-03-09	23	6.9	.	4.78	.	.	.	.	.	.
5533	1	5533_1	5533_1_5	2016-02-15	w	1.5	iron2	2016-03-09	23	7.4	.	22.96	.	.	.	.	.	.
5533	1	5533_1	5533_1_7	2016-02-15	w	1.5	iron3	2016-03-09	23	6.3	.	18.26	.	.	.	.	.	.
5533	1	5533_1	5533_1_2	2016-02-15	m	1.8	iron2	2016-03-09	23	8.3	.	13.65	.	.	.	.	.	.
5533	1	5533_1	5533_1_12	2016-02-15	m	1.1	iron2	2016-03-09	23	5.8	.	25.8	.	.	.	.	.	.
5533	1	5533_1	5533_1_8	2016-02-15	w	1.5	iron1	2016-03-09	23	7	.	4.69	.	.	.	.	.	.
561	8	561_8	561_8_13	2016-03-02	w	1.2	iron3	2016-03-24	22	5.9	42	32.09	.	.	.	.	.	.
561	8	561_8	561_8_6	2016-03-02	w	1.5	iron2	2016-03-24	22	7.7	40	30.41	.	.	.	.	.	.
561	8	561_8	561_8_12	2016-03-02	w	1.3	iron3	2016-03-24	22	5.2	38	40.62	.	.	.	.	.	.
561	8	561_8	561_8_3	2016-03-02	w	1.9	iron1	2016-03-24	22	9	30	13.78	.	.	.	.	.	.
561	8	561_8	561_8_1	2016-03-02	m	2	iron2	2016-03-24	22	9	36	13.27	.	.	.	.	.	.
561	8	561_8	561_8_7	2016-03-02	w	1.5	iron3	2016-03-24	22	8	27	48.07	.	.	.	.	.	.
561	8	561_8	561_8_11	2016-03-02	m	1.4	iron2	2016-03-24	22	7.7	43	35.71	.	.	.	.	.	.
561	8	561_8	561_8_9	2016-03-02	w	1.4	iron1	2016-03-24	22	6.7	24	10.68	.	.	.	.	.	.
561	8	561_8	561_8_5	2016-03-02	m	1.5	iron1	2016-03-24	22	6.6	21	17.7	.	.	.	.	.	.
5526	1	5526_1	5526_1_1	2016-03-03	w	1.5	iron1	2016-03-24	21	6.4	34	6.25	.	.	.	.	.	.
5526	1	5526_1	5526_1_3	2016-03-03	w	1.4	iron3	2016-03-24	21	6.6	42	34.54	.	.	.	.	.	.
5526	1	5526_1	5526_1_4	2016-03-03	w	1.3	iron1	2016-03-24	21	6.4	36	4.69	.	.	.	.	.	.
5526	1	5526_1	5526_1_10	2016-03-03	m	1.1	iron3	2016-03-24	21	6.3	44	23.82	.	.	.	.	.	.
5526	1	5526_1	5526_1_9	2016-03-03	w	1.1	iron2	2016-03-24	21	5	38	34.37	.	.	.	.	.	.
5526	1	5526_1	5526_1_6	2016-03-03	m	1.2	iron3	2016-03-24	21	6.5	39	34.24	.	.	.	.	.	.
5526	1	5526_1	5526_1_8	2016-03-03	m	1.1	iron2	2016-03-24	21	5.6	39	25.97	.	.	.	.	.	.
5526	1	5526_1	5526_1_7	2016-03-03	w	1.2	iron2	2016-03-24	21	6.3	32	24.34	.	.	.	.	.	.
5526	1	5526_1	5526_1_2	2016-03-03	m	1.4	iron1	2016-03-24	21	6.6	30	4.18	.	.	.	.	.	.
2382	1	2382_1	2382_1_6	2016-05-12	w	1.5	iron1	2016-06-02	21	6.3	33	3.79	.	.	.	.	.	.
2382	1	2382_1	2382_1_2	2016-05-12	m	1.8	iron1	2016-06-02	21	6.7	34	4.65	.	.	.	.	.	.
2382	1	2382_1	2382_1_9	2016-05-12	w	1.2	iron3	2016-06-02	21	5.2	37	20.5	.	.	.	.	.	.
2382	1	2382_1	2382_1_5	2016-05-12	m	1.6	iron2	2016-06-02	21	7.3	39	21.15	.	.	.	.	.	.
2382	1	2382_1	2382_1_3	2016-05-12	w	1.8	iron1	2016-06-02	21	7.4	33	7.15	.	.	.	.	.	.
2382	1	2382_1	2382_1_7	2016-05-12	w	1.3	iron3	2016-06-02	21	6.3	37	20.85	.	.	.	.	.	.
2382	1	2382_1	2382_1_8	2016-05-12	w	1.3	iron2	2016-06-02	21	6.3	37	17.83	.	.	.	.	.	.
2382	1	2382_1	2382_1_4	2016-05-12	w	1.7	iron3	2016-06-02	21	6.1	37	18.99	.	.	.	.	.	.
2382	1	2382_1	2382_1_1	2016-05-12	w	1.9	iron2	2016-06-02	21	5.9	37	21.41	.	.	.	.	.	.
2383	1	2383_1	2383_1_6	2016-05-10	w	1.4	iron2	2016-06-02	23	7.5	37	26.75	.	.	.	.	.	.
2383	1	2383_1	2383_1_3	2016-05-10	m	1.6	iron3	2016-06-02	23	7.6	38	24.68	.	.	.	.	.	.
2383	1	2383_1	2383_1_7	2016-05-10	w	1.4	iron2	2016-06-02	23	6.8	39	25.5	.	.	.	.	.	.
2383	1	2383_1	2383_1_10	2016-05-10	m	1.3	iron2	2016-06-02	23	6.4	37	20.63	.	.	.	.	.	.
2383	1	2383_1	2383_1_4	2016-05-10	w	1.6	iron3	2016-06-02	23	7.6	37	19.08	.	.	.	.	.	.
2383	1	2383_1	2383_1_5	2016-05-10	w	1.5	iron3	2016-06-02	23	7	36	20.29	.	.	.	.	.	.
2383	1	2383_1	2383_1_2	2016-05-10	w	1.7	iron1	2016-06-02	23	7.6	29	3.14	.	.	.	.	.	.
2383	1	2383_1	2383_1_9	2016-05-10	w	1.3	iron1	2016-06-02	23	6.3	32	3.36	.	.	.	.	.	.
2383	1	2383_1	2383_1_1	2016-05-10	m	1.9	iron1	2016-06-02	23	7.7	27	5.9	.	.	.	.	.	.
5532	1	5532_1	5532_1_3	2016-05-23	w	1.8	iron2	2016-06-14	22	7.2	39	20.07	.	.	.	.	.	.
5532	1	5532_1	5532_1_5	2016-05-23	m	1.8	iron3	2016-06-14	22	6.1	34	31.31	.	.	.	.	.	.
5532	1	5532_1	5532_1_8	2016-05-23	w	1.7	iron1	2016-06-14	22	6.9	37	9.69	.	.	.	.	.	.
5532	1	5532_1	5532_1_1	2016-05-23	w	1.9	iron3	2016-06-14	22	6.5	36	33.9	.	.	.	.	.	.
5532	1	5532_1	5532_1_12	2016-05-23	m	1.2	iron1	2016-06-14	22	5.4	39	9.22	.	.	.	.	.	.
5532	1	5532_1	5532_1_2	2016-05-23	w	1.9	iron1	2016-06-14	22	7.6	34	10.29	.	.	.	.	.	.
5532	1	5532_1	5532_1_11	2016-05-23	m	1.4	iron2	2016-06-14	22	5.6	37	25.97	.	.	.	.	.	.
5532	1	5532_1	5532_1_9	2016-05-23	w	1.4	iron3	2016-06-14	22	6.6	41	21.88	.	.	.	.	.	.
5532	1	5532_1	5532_1_7	2016-05-23	w	1.7	iron2	2016-06-14	22	6.4	38	21.23	.	.	.	.	.	.
5014	8	5014_8	5014_8_8	2016-05-15	w	1.8	iron1	2016-06-07	23	8.1	34	5.69	.	.	.	.	.	.
5014	8	5014_8	5014_8_3	2016-05-15	w	2.2	iron1	2016-06-07	23	9.5	32	3.1	.	.	.	.	.	.
5014	8	5014_8	5014_8_7	2016-05-15	w	1.8	iron1	2016-06-07	23	7.8	35	6.5	.	.	.	.	.	.
5014	8	5014_8	5014_8_1	2016-05-15	w	2.2	iron2	2016-06-07	23	9.5	34	24.64	.	.	.	.	.	.
5014	8	5014_8	5014_8_6	2016-05-15	w	2	iron2	2016-06-07	23	9.4	42	10.47	.	.	.	.	.	.
5014	8	5014_8	5014_8_11	2016-05-15	w	1.6	iron3	2016-06-07	23	6.6	42	27.87	.	.	.	.	.	.
5014	8	5014_8	5014_8_4	2016-05-15	w	2.1	iron3	2016-06-07	23	9	36	22.53	.	.	.	.	.	.
5014	8	5014_8	5014_8_5	2016-05-15	w	1.9	iron2	2016-06-07	23	8.6	44	19.81	.	.	.	.	.	.
5014	8	5014_8	5014_8_10	2016-05-15	m	1.6	iron3	2016-06-07	23	5.5	43	18.48	.	.	.	.	.	.
48241	1	48241_1	48241_1_9	2016-06-04	m	1.1	iron3	2016-06-23	19	4.4	18	35.02	.	.	.	.	.	.
48241	1	48241_1	48241_1_7	2016-06-04	m	1.1	iron1	2016-06-23	19	3.6	17	1.64	.	.	.	.	.	.
48241	1	48241_1	48241_1_12	2016-06-04	w	0.7	iron2	2016-06-23	19	3.4	37	27.05	.	.	.	.	.	.
48241	1	48241_1	48241_1_4	2016-06-04	w	1.1	iron3	2016-06-23	19	3.8	39	29.81	.	.	.	.	.	.
48241	1	48241_1	48241_1_8	2016-06-04	m	1.1	iron2	2016-06-23	19	4.2	38	19.43	.	.	.	.	.	.
48241	1	48241_1	48241_1_1	2016-06-04	m	1.3	iron3	2016-06-23	19	4.6	42	40.23	.	.	.	.	.	.
48241	1	48241_1	48241_1_3	2016-06-04	w	1.2	iron2	2016-06-23	19	4.3	41	37.6	.	.	.	.	.	.
48241	1	48241_1	48241_1_2	2016-06-04	m	1.2	iron1	2016-06-23	19	4	41	.	.	.	.	.	.	.
48241	1	48241_1	48241_1_5	2016-06-04	w	1.1	iron1	2016-06-23	19	4.3	39	31.14	.	.	.	.	.	.
51932	3	51932_3	51932_3_7	2016-06-16	m	1.2	iron1	2016-07-07	21	6.6	36	9.52	.	.	.	.	.	.
51932	3	51932_3	51932_3_9	2016-06-16	m	1.1	iron3	2016-07-07	21	6.1	42	30.06	.	.	.	.	.	.
51932	3	51932_3	51932_3_10	2016-06-16	w	1.1	iron3	2016-07-07	21	.	.	.	.	.	.	.	.	.
51932	3	51932_3	51932_3_8	2016-06-16	w	1.2	iron1	2016-07-07	21	7.2	35	9.3	.	.	.	.	.	.
51932	3	51932_3	51932_3_3	2016-06-16	w	1.3	iron3	2016-07-07	21	7.1	38	5.34	.	.	.	.	.	.
51932	3	51932_3	51932_3_2	2016-06-16	m	1.6	iron1	2016-07-07	21	7.7	35	4.48	.	.	.	.	.	.
51932	3	51932_3	51932_3_5	2016-06-16	m	1.3	iron2	2016-07-07	21	4.9	41	25.89	.	.	.	.	.	.
51932	3	51932_3	51932_3_6	2016-06-16	w	1.3	iron2	2016-07-07	21	5.9	36	23.13	.	.	.	.	.	.
51932	3	51932_3	51932_3_4	2016-06-16	w	1.3	iron2	2016-07-07	21	7.5	42	32.78	.	.	.	.	.	.
51941	3	51941_3	51941_3_7	2016-06-16	w	1	iron1	2016-07-07	21	4.3	42	23.73	.	.	.	.	.	.
51941	3	51941_3	51941_3_4	2016-06-16	w	1.3	iron1	2016-07-07	21	6.3	34	5.9	.	.	.	.	.	.
51941	3	51941_3	51941_3_2	2016-06-16	w	1.4	iron3	2016-07-07	21	7	40	36.31	.	.	.	.	.	.
51941	3	51941_3	51941_3_9	2016-06-16	m	0.8	iron1	2016-07-07	21	6.4	37	16.02	.	.	.	.	.	.
51941	3	51941_3	51941_3_3	2016-06-16	w	1.3	iron2	2016-07-07	21	7.3	34	4.87	.	.	.	.	.	.
51941	3	51941_3	51941_3_8	2016-06-16	w	0.9	iron2	2016-07-07	21	5.3	44	17.96	.	.	.	.	.	.
51941	3	51941_3	51941_3_10	2016-06-16	m	0.8	iron2	2016-07-07	21	.	.	.	.	.	.	.	.	.
51941	3	51941_3	51941_3_5	2016-06-16	m	1.2	iron3	2016-07-07	21	6.1	41	25.41	.	.	.	.	.	.
51941	3	51941_3	51941_3_6	2016-06-16	w	1.1	iron3	2016-07-07	21	.	.	.	.	.	.	.	.	.
564	6	564_6	564_6_2	2016-03-18	m	2.2	iron3	2016-04-07	20	9.2	40	22.01	.	.	.	.	.	.
564	6	564_6	564_6_3	2016-03-18	m	2.2	iron2	2016-04-07	20	9.5	42	12.75	.	.	.	.	.	.
564	6	564_6	564_6_4	2016-03-18	m	2.2	iron2	2016-04-07	20	9.5	36	15.07	.	.	.	.	.	.
564	6	564_6	564_6_1	2016-03-18	w	2.4	iron3	2016-04-07	20	7.4	44	28.64	.	.	.	.	.	.
564	6	564_6	564_6_11	2016-03-18	w	1.1	iron2	2016-04-07	20	6.9	44	31.31	.	.	.	.	.	.
564	6	564_6	564_6_5	2016-03-18	w	1.2	iron3	2016-04-07	20	9.1	43	17.27	.	.	.	.	.	.
564	6	564_6	564_6_6	2016-03-18	w	2.1	iron1	2016-04-07	20	9.8	33	4.09	.	.	.	.	.	.
564	6	564_6	564_6_7	2016-03-18	w	1.9	iron1	2016-04-07	20	7.7	32	4.91	.	.	.	.	.	.
564	6	564_6	564_6_8	2016-03-18	m	1.4	iron1	2016-04-07	20	7.3	35	8.01	.	.	.	.	.	.
562	8	562_8	562_8_3	2016-04-29	m	1.5	iron1	2016-05-19	20	4.9	37	13.91	.	.	.	.	.	.
562	8	562_8	562_8_6	2016-04-29	w	1.3	iron3	2016-05-19	20	6.3	43	43.93	.	.	.	.	.	.
562	8	562_8	562_8_7	2016-04-29	w	1.3	iron3	2016-05-19	20	6.7	41	23.73	.	.	.	.	.	.
562	8	562_8	562_8_8	2016-04-29	w	1.3	iron1	2016-05-19	20	5.6	37	2.8	.	.	.	.	.	.
562	8	562_8	562_8_9	2016-04-29	w	1.3	iron3	2016-05-19	20	6.3	43	38.72	.	.	.	.	.	.
562	8	562_8	562_8_10	2016-04-29	w	1.3	iron1	2016-05-19	20	3.7	42	23.3	.	.	.	.	.	.
562	8	562_8	562_8_11	2016-04-29	w	1.3	iron2	2016-05-19	20	6.6	42	18.82	.	.	.	.	.	.
562	8	562_8	562_8_12	2016-04-29	w	1.2	iron2	2016-05-19	20	6.4	32	34.24	.	.	.	.	.	.
562	8	562_8	562_8_13	2016-04-29	m	1.2	iron2	2016-05-19	20	5.8	42	22.4	.	.	.	.	.	.
544	3	544_3	544_3_9	2016-04-26	w	1.5	iron1	2016-05-19	23	7.2	33	3.14	.	.	.	.	.	.
544	3	544_3	544_3_12	2016-04-26	w	1.3	iron1	2016-05-19	23	7.3	33	5.6	.	.	.	.	.	.
544	3	544_3	544_3_8	2016-04-26	m	1.5	iron3	2016-05-19	23	6.7	38	23.47	.	.	.	.	.	.
544	3	544_3	544_3_11	2016-04-26	w	1.4	iron1	2016-05-19	23	7.7	33	4.35	.	.	.	.	.	.
544	3	544_3	544_3_15	2016-04-26	m	0.9	iron3	2016-05-19	23	4.3	38	33.12	.	.	.	.	.	.
544	3	544_3	544_3_13	2016-04-26	m	1.1	iron3	2016-05-19	23	.	.	.	.	.	.	.	.	.
544	3	544_3	544_3_10	2016-04-26	w	1.4	iron2	2016-05-19	23	7.4	39	20.85	.	.	.	.	.	.
544	3	544_3	544_3_7	2016-04-26	w	1.6	iron2	2016-05-19	23	9	33	7.06	.	.	.	.	.	.
544	3	544_3	544_3_6	2016-04-26	m	1.8	iron2	2016-05-19	23	9.1	41	9.99	.	.	.	.	.	.
2381	3	2381_3	2381_3_6	2016-07-28	w	1.5	iron3	2016-08-18	21	7	39	27.48	.	.	.	.	.	.
2381	3	2381_3	2381_3_9	2016-07-28	w	1.5	iron3	2016-08-18	21	7.3	38	19.38	.	.	.	.	.	.
2381	3	2381_3	2381_3_12	2016-07-28	w	1.3	iron2	2016-08-18	21	6.5	37	17.23	.	.	.	.	.	.
2381	3	2381_3	2381_3_11	2016-07-28	m	1.4	iron3	2016-08-18	21	5.3	37	24.42	.	.	.	.	.	.
2381	3	2381_3	2381_3_7	2016-07-28	m	1.5	iron2	2016-08-18	21	6.1	42	30.41	.	.	.	.	.	.
2381	3	2381_3	2381_3_1	2016-07-28	m	1.7	iron2	2016-08-18	21	5.5	37	23.65	.	.	.	.	.	.
2381	3	2381_3	2381_3_10	2016-07-28	m	1.5	iron1	2016-08-18	21	6.3	35	8.74	.	.	.	.	.	.
2381	3	2381_3	2381_3_4	2016-07-28	w	1.6	iron1	2016-08-18	21	7.1	32	9.26	.	.	.	.	.	.
2381	3	2381_3	2381_3_5	2016-07-28	w	1.6	iron1	2016-08-18	21	7.3	31	6.42	.	.	.	.	.	.
51931	8	51931_8	51931_8_2	2016-07-29	m	1.7	iron3	2016-08-18	20	6.2	44	29.68	.	.	.	.	.	.
51931	8	51931_8	51931_8_12	2016-07-29	w	1.4	iron3	2016-08-18	20	5.9	40	21.28	.	.	.	.	.	.
51931	8	51931_8	51931_8_6	2016-07-29	m	1.6	iron2	2016-08-18	20	6.9	38	24.03	.	.	.	.	.	.
51931	8	51931_8	51931_8_7	2016-07-29	w	1.6	iron3	2016-08-18	20	8.3	38	26.92	.	.	.	.	.	.
51931	8	51931_8	51931_8_4	2016-07-29	m	1.6	iron2	2016-08-18	20	6.9	40	32.95	.	.	.	.	.	.
51931	8	51931_8	51931_8_9	2016-07-29	m	1.5	iron2	2016-08-18	20	7.5	38	21.49	.	.	.	.	.	.
51931	8	51931_8	51931_8_10	2016-07-29	m	1.4	iron1	2016-08-18	20	6.3	36	8.49	.	.	.	.	.	.
51931	8	51931_8	51931_8_3	2016-07-29	m	1.7	iron1	2016-08-18	20	6.9	36	6.89	.	.	.	.	.	.
51931	8	51931_8	51931_8_1	2016-07-29	m	1.8	iron1	2016-08-18	20	7	36	5.13	.	.	.	.	.	.
5533	2	5533_2	5533_2_3	2016-07-28	m	1.8	iron2	2016-08-18	21	7.7	42	30.41	.	.	.	.	.	.
5533	2	5533_2	5533_2_11	2016-07-28	m	1.3	iron2	2016-08-18	21	5.3	41	24.16	.	.	.	.	.	.
5533	2	5533_2	5533_2_2	2016-07-28	m	1.8	iron2	2016-08-18	21	6.8	40	26.88	.	.	.	.	.	.
5533	2	5533_2	5533_2_6	2016-07-28	m	1.5	iron1	2016-08-18	21	5.7	35	11.76	.	.	.	.	.	.
5533	2	5533_2	5533_2_10	2016-07-28	w	1.3	iron1	2016-08-18	21	4.7	37	11.07	.	.	.	.	.	.
5533	2	5533_2	5533_2_8	2016-07-28	m	1.5	iron1	2016-08-18	21	6.6	30	4.13	.	.	.	.	.	.
5533	2	5533_2	5533_2_5	2016-07-28	w	1.6	iron3	2016-08-18	21	6.9	38	19.34	.	.	.	.	.	.
5533	2	5533_2	5533_2_1	2016-07-28	m	1.9	iron3	2016-08-18	21	7.7	37	18.05	.	.	.	.	.	.
5533	2	5533_2	5533_2_4	2016-07-28	w	1.7	iron3	2016-08-18	21	6.1	34	11.5	.	.	.	.	.	.
5524	7	5524_7	5524_7_1	2016-08-01	m	2.2	iron1	2016-08-23	22	4.2	24	1.72	.	.	.	.	.	.
5524	7	5524_7	5524_7_9	2016-08-01	w	0.9	iron3	2016-08-23	22	.	.	.	.	.	.	.	.	.
5524	7	5524_7	5524_7_8	2016-08-01	m	1.6	iron2	2016-08-23	22	5.3	37	10.81	.	.	.	.	.	.
5524	7	5524_7	5524_7_3	2016-08-01	w	1.9	iron3	2016-08-23	22	4.5	35	30.11	.	.	.	.	.	.
5524	7	5524_7	5524_7_7	2016-08-01	w	1.7	iron2	2016-08-23	22	5.5	35	29.76	.	.	.	.	.	.
5524	7	5524_7	5524_7_5	2016-08-01	w	1.9	iron1	2016-08-23	22	3.2	21	1.77	.	.	.	.	.	.
5524	7	5524_7	5524_7_4	2016-08-01	m	1.9	iron2	2016-08-23	22	3.2	28	25.63	.	.	.	.	.	.
5524	7	5524_7	5524_7_6	2016-08-01	w	1.8	iron1	2016-08-23	22	3.6	20	1.94	.	.	.	.	.	.
5524	7	5524_7	5524_7_2	2016-08-01	w	2	iron3	2016-08-23	22	6.6	34	12.88	.	.	.	.	.	.
48242	1	48242_1	48242_1_2	2016-08-03	m	1.4	iron2	2016-08-23	20	5.2	40	30.41	.	.	.	.	.	.
48242	1	48242_1	48242_1_6	2016-08-03	w	1.1	iron2	2016-08-23	20	4.5	42	24.16	.	.	.	.	.	.
48242	1	48242_1	48242_1_1	2016-08-03	w	1.4	iron2	2016-08-23	20	4.1	41	26.88	.	.	.	.	.	.
48242	1	48242_1	48242_1_7	2016-08-03	w	1.1	iron1	2016-08-23	20	4	40	16.45	.	.	.	.	.	.
48242	1	48242_1	48242_1_9	2016-08-03	w	0.9	iron1	2016-08-23	20	4.2	35	4.65	.	.	.	.	.	.
48242	1	48242_1	48242_1_5	2016-08-03	w	1.2	iron1	2016-08-23	20	4.2	38	9.39	.	.	.	.	.	.
48242	1	48242_1	48242_1_8	2016-08-03	m	1	iron3	2016-08-23	20	4.2	42	20.33	.	.	.	.	.	.
48242	1	48242_1	48242_1_3	2016-08-03	m	1.2	iron3	2016-08-23	20	4.7	41	29.33	.	.	.	.	.	.
48242	1	48242_1	48242_1_4	2016-08-03	m	1.2	iron3	2016-08-23	20	4.7	42	37.95	.	.	.	.	.	.
48243	1	48243_1	48243_1_11	2016-08-09	m	1.3	iron1	2016-08-30	21	5.7	37	11.16	.	.	.	.	.	.
48243	1	48243_1	48243_1_2	2016-08-09	w	1.6	iron2	2016-08-30	21	6.4	40	24.51	.	.	.	.	.	.
48243	1	48243_1	48243_1_5	2016-08-09	w	1.6	iron1	2016-08-30	21	6.5	33	7.32	.	.	.	.	.	.
48243	1	48243_1	48243_1_9	2016-08-09	w	1.4	iron1	2016-08-30	21	6.5	37	14.47	.	.	.	.	.	.
48243	1	48243_1	48243_1_3	2016-08-09	m	1.6	iron2	2016-08-30	21	6.5	38	29.03	.	.	.	.	.	.
48243	1	48243_1	48243_1_10	2016-08-09	w	1.4	iron2	2016-08-30	21	5.4	37	27.18	.	.	.	.	.	.
48243	1	48243_1	48243_1_1	2016-08-09	m	1.8	iron3	2016-08-30	21	6.3	37	20.93	.	.	.	.	.	.
48243	1	48243_1	48243_1_4	2016-08-09	w	1.6	iron3	2016-08-30	21	7.2	38	23.43	.	.	.	.	.	.
48243	1	48243_1	48243_1_8	2016-08-09	m	1.4	iron3	2016-08-30	21	6.3	40	30.67	.	.	.	.	.	.
5526	2	5526_2	5526_2_10	2016-08-13	w	1.8	iron1	2016-09-02	20	6.2	34	7.84	.	.	.	.	.	.
5526	2	5526_2	5526_2_5	2016-08-13	w	2	iron3	2016-09-02	20	7.7	37	15.16	.	.	.	.	.	.
5526	2	5526_2	5526_2_4	2016-08-13	w	2.1	iron3	2016-09-02	20	6.6	37	17.01	.	.	.	.	.	.
5526	2	5526_2	5526_2_12	2016-08-13	m	1.4	iron1	2016-09-02	20	6	32	9.39	.	.	.	.	.	.
5526	2	5526_2	5526_2_6	2016-08-13	w	2	iron3	2016-09-02	20	6.4	39	26.58	.	.	.	.	.	.
5526	2	5526_2	5526_2_9	2016-08-13	w	1.8	iron1	2016-09-02	20	7	30	8.4	.	.	.	.	.	.
5526	2	5526_2	5526_2_1	2016-08-13	w	2.2	iron2	2016-09-02	20	7	37	19.47	.	.	.	.	.	.
5526	2	5526_2	5526_2_7	2016-08-13	w	1.9	iron2	2016-09-02	20	6.8	36	22.44	.	.	.	.	.	.
5526	2	5526_2	5526_2_2	2016-08-13	m	2.2	iron2	2016-09-02	20	8	37	18.91	.	.	.	.	.	.
543	3	543_3	543_3_1	2016-10-19	w	2	iron2	2016-11-09	21	8.9	38	.	.	.	.	.	.	.
543	3	543_3	543_3_10	2016-10-19	w	1.3	iron1	2016-11-09	21	6.7	38	5.13	.	.	.	.	.	.
543	3	543_3	543_3_2	2016-10-19	w	1.7	iron1	2016-11-09	21	8	45	4.35	.	.	.	.	.	.
543	3	543_3	543_3_11	2016-10-19	w	1.2	iron2	2016-11-09	21	6.4	42	.	.	.	.	.	.	.
543	3	543_3	543_3_9	2016-10-19	m	1.3	iron1	2016-11-09	21	6.6	33	4.57	.	.	.	.	.	.
543	3	543_3	543_3_8	2016-10-19	m	1.3	iron2	2016-11-09	21	5.7	42	29.42	.	.	.	.	.	.
543	3	543_3	543_3_5	2016-10-19	w	1.5	iron3	2016-11-09	21	7.8	42	32.95	.	.	.	.	.	.
543	3	543_3	543_3_6	2016-10-19	w	1.4	iron3	2016-11-09	21	7	43	.	.	.	.	.	.	.
543	3	543_3	543_3_4	2016-10-19	w	1.6	iron3	2016-11-09	21	6.9	41	32.73	.	.	.	.	.	.
544	4	544_4	544_4_2	2016-10-07	w	1.6	iron1	2016-10-27	20	6.8	32	6.98	.	.	.	.	.	.
544	4	544_4	544_4_5	2016-10-07	m	1.3	iron3	2016-10-27	20	7.9	37	25.28	.	.	.	.	.	.
544	4	544_4	544_4_1	2016-10-07	m	1.9	iron1	2016-10-27	20	7.2	32	5.73	.	.	.	.	.	.
544	4	544_4	544_4_9	2016-10-07	m	1	iron1	2016-10-27	20	5.6	31	5.21	.	.	.	.	.	.
544	4	544_4	544_4_8	2016-10-07	m	1.1	iron3	2016-10-27	20	6.7	40	39.5	.	.	.	.	.	.
544	4	544_4	544_4_4	2016-10-07	m	1.4	iron2	2016-10-27	20	7.3	40	32	.	.	.	.	.	.
544	4	544_4	544_4_6	2016-10-07	w	1.2	iron3	2016-10-27	20	5.8	43	32.39	.	.	.	.	.	.
544	4	544_4	544_4_7	2016-10-07	m	1.2	iron2	2016-10-27	20	4.8	33	29.2	.	.	.	.	.	.
544	4	544_4	544_4_3	2016-10-07	m	1.6	iron2	2016-10-27	20	7.8	40	19.9	.	.	.	.	.	.
561	9	561_9	561_9_4	2016-09-01	w	1.5	iron2	2016-09-22	21	6.2	39	26.06	.	.	.	.	.	.
561	9	561_9	561_9_11	2016-09-01	w	1.2	iron3	2016-09-22	21	5.9	47	43.24	.	.	.	.	.	.
561	9	561_9	561_9_2	2016-09-01	w	1.5	iron2	2016-09-22	21	6.4	42	26.32	.	.	.	.	.	.
561	9	561_9	561_9_5	2016-09-01	m	1.5	iron3	2016-09-22	21	6.1	41	29.07	.	.	.	.	.	.
561	9	561_9	561_9_1	2016-09-01	w	1.6	iron3	2016-09-22	21	6.6	43	34.03	.	.	.	.	.	.
561	9	561_9	561_9_7	2016-09-01	w	1.4	iron2	2016-09-22	21	5.5	43	32.52	.	.	.	.	.	.
561	9	561_9	561_9_8	2016-09-01	m	1.3	iron1	2016-09-22	21	6.3	38	16.41	.	.	.	.	.	.
561	9	561_9	561_9_13	2016-09-01	m	1.2	iron1	2016-09-22	21	4.5	34	12.62	.	.	.	.	.	.
561	9	561_9	561_9_3	2016-09-01	w	1.5	iron1	2016-09-22	21	6.3	39	7.71	.	.	.	.	.	.
562	9	562_9	562_9_4	2016-10-06	w	1.6	iron1	2016-10-27	21	6.6	40	11.67	.	.	.	.	.	.
562	9	562_9	562_9_3	2016-10-06	w	1.8	iron1	2016-10-27	21	7.7	43	8.36	.	.	.	.	.	.
562	9	562_9	562_9_8	2016-10-06	w	1.4	iron2	2016-10-27	21	6.3	42	36.74	.	.	.	.	.	.
562	9	562_9	562_9_2	2016-10-06	w	1.9	iron2	2016-10-27	21	7.3	40	27.39	.	.	.	.	.	.
562	9	562_9	562_9_5	2016-10-06	m	1.6	iron3	2016-10-27	21	6.7	43	39.15	.	.	.	.	.	.
562	9	562_9	562_9_6	2016-10-06	m	1.4	iron1	2016-10-27	21	6.2	35	6.93	.	.	.	.	.	.
562	9	562_9	562_9_7	2016-10-06	m	1.4	iron2	2016-10-27	21	6.7	42	21.36	.	.	.	.	.	.
562	9	562_9	562_9_11	2016-10-06	w	1.3	iron3	2016-10-27	21	6.7	43	41.69	.	.	.	.	.	.
562	9	562_9	562_9_1	2016-10-06	w	1.9	iron3	2016-10-27	21	8.2	41	24.42	.	.	.	.	.	.
1911	7	1911_7	1911_7_4	2016-10-07	m	1.8	iron3	2016-10-27	20	8	37	41.26	.	.	.	.	.	.
1911	7	1911_7	1911_7_7	2016-10-07	w	1.3	iron3	2016-10-27	20	5.6	42	26.19	.	.	.	.	.	.
1911	7	1911_7	1911_7_1	2016-10-07	m	2	iron3	2016-10-27	20	8.2	41	26.75	.	.	.	.	.	.
1911	7	1911_7	1911_7_3	2016-10-07	w	1.8	iron2	2016-10-27	20	6.4	41	40.06	.	.	.	.	.	.
1911	7	1911_7	1911_7_2	2016-10-07	w	1.8	iron2	2016-10-27	20	7.3	45	31.96	.	.	.	.	.	.
1911	7	1911_7	1911_7_5	2016-10-07	w	1.7	iron2	2016-10-27	20	6.8	43	32.95	.	.	.	.	.	.
1911	7	1911_7	1911_7_10	2016-10-07	w	1.8	iron1	2016-10-27	20	7	31	3.92	.	.	.	.	.	.
1911	7	1911_7	1911_7_8	2016-10-07	w	1.1	iron1	2016-10-27	20	3.3	39	.	.	.	.	.	.	.
1911	7	1911_7	1911_7_6	2016-10-07	m	1.5	iron1	2016-10-27	20	8.1	40	.	.	.	.	.	.	.
1913	1	1913_1	1913_1_2	2016-10-10	m	1.2	iron1	.	.	.	.	5.86	.	.	.	.	.	.
1913	1	1913_1	1913_1_6	2016-10-10	m	1.1	iron2	.	.	.	.	18.09	.	.	.	.	.	.
1913	1	1913_1	1913_1_7	2016-10-10	m	1	iron3	.	.	.	.	23.43	.	.	.	.	.	.
1913	1	1913_1	1913_1_5	2016-10-10	w	1.1	iron1	.	.	.	.	6.93	.	.	.	.	.	.
1913	1	1913_1	1913_1_1	2016-10-10	m	1.4	iron2	.	.	.	.	32.09	.	.	.	.	.	.
1913	1	1913_1	1913_1_4	2016-10-10	m	1.2	iron1	.	.	.	.	11.97	.	.	.	.	.	.
1913	1	1913_1	1913_1_10	2016-10-10	m	1	iron2	.	.	.	.	24.34	.	.	.	.	.	.
1913	1	1913_1	1913_1_3	2016-10-10	w	1.2	iron3	.	.	.	.	28.21	.	.	.	.	.	.
1913	1	1913_1	1913_1_9	2016-10-10	w	1	iron3	.	.	.	.	26.79	.	.	.	.	.	.
1915	2	1915_2	1915_2_2	2016-10-19	w	1.7	iron1	2016-11-09	21	6.4	31	3.57	.	.	.	.	.	.
1915	2	1915_2	1915_2_3	2016-10-19	m	1.5	iron1	2016-11-09	21	7.1	35	4.57	.	.	.	.	.	.
1915	2	1915_2	1915_2_1	2016-10-19	w	1.8	iron1	2016-11-09	21	7.2	34	4.57	.	.	.	.	.	.
1915	2	1915_2	1915_2_7	2016-10-19	w	1.3	iron3	2016-11-09	21	6	45	37.86	.	.	.	.	.	.
1915	2	1915_2	1915_2_9	2016-10-19	w	1.3	iron3	2016-11-09	21	6.2	37	23.09	.	.	.	.	.	.
1915	2	1915_2	1915_2_10	2016-10-19	m	1.3	iron3	2016-11-09	21	6.4	41	26.83	.	.	.	.	.	.
1915	2	1915_2	1915_2_4	2016-10-19	m	1.5	iron2	2016-11-09	21	6.3	42	17.66	.	.	.	.	.	.
1915	2	1915_2	1915_2_5	2016-10-19	m	1.4	iron2	2016-11-09	21	6.2	44	24.81	.	.	.	.	.	.
1915	2	1915_2	1915_2_6	2016-10-19	w	1.3	iron2	2016-11-09	21	6.2	43	31.83	.	.	.	.	.	.
2111	1	2111_1	2111_1_13	2016-09-02	w	0.9	iron1	2016-09-22	20	3.8	39	16.71	.	.	.	.	.	.
2111	1	2111_1	2111_1_5	2016-09-02	m	1.3	iron1	2016-09-22	20	4.4	35	10.25	.	.	.	.	.	.
2111	1	2111_1	2111_1_2	2016-09-02	m	1.4	iron3	2016-09-22	20	4.9	39	18.18	.	.	.	.	.	.
2111	1	2111_1	2111_1_8	2016-09-02	w	1.2	iron1	2016-09-22	20	4.1	38	21.66	.	.	.	.	.	.
2111	1	2111_1	2111_1_1	2016-09-02	w	1.5	iron3	2016-09-22	20	4.9	44	28.47	.	.	.	.	.	.
2111	1	2111_1	2111_1_3	2016-09-02	w	1.4	iron2	2016-09-22	20	4.8	37	9.95	.	.	.	.	.	.
2111	1	2111_1	2111_1_7	2016-09-02	m	1.3	iron3	2016-09-22	20	3.9	37	15.98	.	.	.	.	.	.
2111	1	2111_1	2111_1_10	2016-09-02	w	1	iron2	2016-09-22	20	4	39	22.48	.	.	.	.	.	.
2111	1	2111_1	2111_1_6	2016-09-02	w	1.3	iron2	2016-09-22	20	4.7	40	24.03	.	.	.	.	.	.
2382	2	2382_2	2382_2_4	2016-10-24	m	1.7	iron2	.	.	.	.	.	.	.	.	.	.	.
2382	2	2382_2	2382_2_6	2016-10-24	m	1.5	iron2	.	.	.	.	.	.	.	.	.	.	.
2382	2	2382_2	2382_2_12	2016-10-24	w	1.1	iron2	.	.	.	.	.	.	.	.	.	.	.
2382	2	2382_2	2382_2_7	2016-10-24	w	1.3	iron1	.	.	.	.	.	.	.	.	.	.	.
2382	2	2382_2	2382_2_1	2016-10-24	m	2.1	iron2	.	.	.	.	.	.	.	.	.	.	.
2382	2	2382_2	2382_2_5	2016-10-24	w	1.6	iron2	.	.	.	.	.	.	.	.	.	.	.
2382	2	2382_2	2382_2_8	2016-10-24	w	1.2	iron2	.	.	.	.	.	.	.	.	.	.	.
2382	2	2382_2	2382_2_3	2016-10-24	m	1.7	iron1	.	.	.	.	.	.	.	.	.	.	.
2382	2	2382_2	2382_2_2	2016-10-24	w	1.8	iron1	.	.	.	.	.	.	.	.	.	.	.
2383	2	2383_2	2383_2_3	2016-10-22	w	1.7	iron3	2016-11-10	19	6.3	34	6.5	.	.	.	.	.	.
2383	2	2383_2	2383_2_1	2016-10-22	w	1.9	iron3	2016-11-10	19	6.6	35	6.81	.	.	.	.	.	.
2383	2	2383_2	2383_2_5	2016-10-22	m	1.5	iron3	2016-11-10	19	.	.	.	.	.	.	.	.	.
2383	2	2383_2	2383_2_2	2016-10-22	m	1.7	iron1	2016-11-10	19	.	.	.	.	.	.	.	.	.
2383	2	2383_2	2383_2_7	2016-10-22	w	1.4	iron1	2016-11-10	19	5.7	39	4.78	.	.	.	.	.	.
2383	2	2383_2	2383_2_10	2016-10-22	m	1.3	iron1	2016-11-10	19	4.7	36	3.23	.	.	.	.	.	.
2383	2	2383_2	2383_2_9	2016-10-22	w	1.4	iron2	2016-11-10	19	4.8	40	6.93	.	.	.	.	.	.
2383	2	2383_2	2383_2_11	2016-10-22	w	1.3	iron2	2016-11-10	19	6.1	37	8.53	.	.	.	.	.	.
2383	2	2383_2	2383_2_4	2016-10-22	m	1.7	iron2	2016-11-10	19	6.4	37	7.15	.	.	.	.	.	.
5014	9	5014_9	5014_9_7	2016-10-20	w	1.6	iron2	2016-11-10	21	6.7	40	10.04	.	.	.	.	.	.
5014	9	5014_9	5014_9_5	2016-10-20	w	1.7	iron1	2016-11-10	21	5.4	35	2.71	.	.	.	.	.	.
5014	9	5014_9	5014_9_9	2016-10-20	m	1.3	iron3	2016-11-10	21	5.3	42	5.69	.	.	.	.	.	.
5014	9	5014_9	5014_9_3	2016-10-20	m	1.8	iron2	2016-11-10	21	7.5	42	13.74	.	.	.	.	.	.
5014	9	5014_9	5014_9_1	2016-10-20	w	2.1	iron1	2016-11-10	21	4.4	45	3.96	.	.	.	.	.	.
5014	9	5014_9	5014_9_4	2016-10-20	m	1.7	iron2	2016-11-10	21	7.1	37	21.71	.	.	.	.	.	.
5014	9	5014_9	5014_9_2	2016-10-20	w	1.8	iron1	2016-11-10	21	7.5	33	2.71	.	.	.	.	.	.
5014	9	5014_9	5014_9_6	2016-10-20	m	1.7	iron3	2016-11-10	21	7.8	37	4.26	.	.	.	.	.	.
5014	9	5014_9	5014_9_8	2016-10-20	m	1.5	iron3	2016-11-10	21	6.3	37	6.68	.	.	.	.	.	.
2381	2	2381_2	2381_2_4	2016-02-14	m	1.5	iron1	2016-03-16	31	.	.	.	.	.	.	.	.	.
2381	2	2381_2	2381_2_7	2016-02-14	w	1.5	iron3	2016-03-16	31	10.7	37	33.34	.	.	.	.	.	.
2381	2	2381_2	2381_2_9	2016-02-14	w	1.2	iron3	2016-03-16	31	7.9	39	27.39	.	.	.	.	.	.
2381	2	2381_2	2381_2_2	2016-02-14	m	1.6	iron1	2016-03-16	31	10.8	37	6.16	.	.	.	.	.	.
2381	2	2381_2	2381_2_1	2016-02-14	m	1.7	iron3	2016-03-16	31	10.3	40	23.95	.	.	.	.	.	.
2381	2	2381_2	2381_2_8	2016-02-14	m	1.4	iron1	2016-03-16	31	8.7	27	5.99	.	.	.	.	.	.
2381	2	2381_2	2381_2_6	2016-02-14	w	1.5	iron2	2016-03-16	31	8.5	38	24.34	.	.	.	.	.	.
2381	2	2381_2	2381_2_3	2016-02-14	m	1.5	iron2	2016-03-16	31	7.9	38	27.22	.	.	.	.	.	.
2381	2	2381_2	2381_2_5	2016-02-14	m	1.5	iron2	2016-03-16	31	8.7	41	20.11	.	.	.	.	.	.
5533	1	5533_1	5533_1_1	2016-02-15	m	2	iron3	2016-03-16	30	6.7	.	.	.	.	.	.	.	.
5533	1	5533_1	5533_1_10	2016-02-15	w	1.4	iron1	2016-03-16	30	7.5	34	8.57	.	.	.	.	.	.
5533	1	5533_1	5533_1_4	2016-02-15	w	1.6	iron3	2016-03-16	30	9.2	43	24.64	.	.	.	.	.	.
5533	1	5533_1	5533_1_6	2016-02-15	w	1.5	iron1	2016-03-16	30	8.6	33	13.96	.	.	.	.	.	.
5533	1	5533_1	5533_1_5	2016-02-15	w	1.5	iron2	2016-03-16	30	9.4	43	21.62	.	.	.	.	.	.
5533	1	5533_1	5533_1_7	2016-02-15	w	1.5	iron3	2016-03-16	30	7.5	38	21.66	.	.	.	.	.	.
5533	1	5533_1	5533_1_2	2016-02-15	m	1.8	iron2	2016-03-16	30	10	39	15.55	.	.	.	.	.	.
5533	1	5533_1	5533_1_12	2016-02-15	m	1.1	iron2	2016-03-16	30	7.1	39	22.48	.	.	.	.	.	.
5533	1	5533_1	5533_1_8	2016-02-15	w	1.5	iron1	2016-03-16	30	8.1	31	3.53	.	.	.	.	.	.
561	8	561_8	561_8_13	2016-03-02	w	1.2	iron3	2016-03-31	29	7.8	42	36.14	.	.	.	.	.	.
561	8	561_8	561_8_6	2016-03-02	w	1.5	iron2	2016-03-31	29	9.2	38	25.93	.	.	.	.	.	.
561	8	561_8	561_8_12	2016-03-02	w	1.3	iron3	2016-03-31	29	6.3	43	32.3	.	.	.	.	.	.
561	8	561_8	561_8_3	2016-03-02	w	1.9	iron1	2016-03-31	29	11.3	29	4.39	.	.	.	.	.	.
561	8	561_8	561_8_1	2016-03-02	m	2	iron2	2016-03-31	29	10.8	36	10.21	.	.	.	.	.	.
561	8	561_8	561_8_7	2016-03-02	w	1.5	iron3	2016-03-31	29	10.3	42	38.72	.	.	.	.	.	.
561	8	561_8	561_8_11	2016-03-02	m	1.4	iron2	2016-03-31	29	9.5	39	35.88	.	.	.	.	.	.
561	8	561_8	561_8_9	2016-03-02	w	1.4	iron1	2016-03-31	29	8.4	26	.	.	.	.	.	.	.
561	8	561_8	561_8_5	2016-03-02	m	1.5	iron1	2016-03-31	29	8.4	32	30.88	.	.	.	.	.	.
5526	1	5526_1	5526_1_1	2016-03-03	w	1.5	iron1	2016-03-31	28	8.1	28	3.96	.	.	.	.	.	.
5526	1	5526_1	5526_1_3	2016-03-03	w	1.4	iron3	2016-03-31	28	7.9	44	31.57	.	.	.	.	.	.
5526	1	5526_1	5526_1_4	2016-03-03	w	1.3	iron1	2016-03-31	28	7.9	28	5.51	.	.	.	.	.	.
5526	1	5526_1	5526_1_10	2016-03-03	m	1.1	iron3	2016-03-31	28	7.7	45	28.64	.	.	.	.	.	.
5526	1	5526_1	5526_1_9	2016-03-03	w	1.1	iron2	2016-03-31	28	5.9	42	28.56	.	.	.	.	.	.
5526	1	5526_1	5526_1_6	2016-03-03	m	1.2	iron3	2016-03-31	28	7.9	45	32.43	.	.	.	.	.	.
5526	1	5526_1	5526_1_8	2016-03-03	m	1.1	iron2	2016-03-31	28	7.1	42	22.96	.	.	.	.	.	.
5526	1	5526_1	5526_1_7	2016-03-03	w	1.2	iron2	2016-03-31	28	7.5	41	17.06	.	.	.	.	.	.
5526	1	5526_1	5526_1_2	2016-03-03	m	1.4	iron1	2016-03-31	28	8	27	2.63	.	.	.	.	.	.
2382	1	2382_1	2382_1_6	2016-05-12	w	1.5	iron1	2016-06-09	28	7.8	32	3.57	.	.	.	.	.	.
2382	1	2382_1	2382_1_2	2016-05-12	m	1.8	iron1	2016-06-09	28	8.5	32	4.31	.	.	.	.	.	.
2382	1	2382_1	2382_1_9	2016-05-12	w	1.2	iron3	2016-06-09	28	6.4	40	23.39	.	.	.	.	.	.
2382	1	2382_1	2382_1_5	2016-05-12	m	1.6	iron2	2016-06-09	28	8.8	37	21.97	.	.	.	.	.	.
2382	1	2382_1	2382_1_3	2016-05-12	w	1.8	iron1	2016-06-09	28	9.3	27	3.62	.	.	.	.	.	.
2382	1	2382_1	2382_1_7	2016-05-12	w	1.3	iron3	2016-06-09	28	7.6	38	20.72	.	.	.	.	.	.
2382	1	2382_1	2382_1_8	2016-05-12	w	1.3	iron2	2016-06-09	28	7.6	38	14.77	.	.	.	.	.	.
2382	1	2382_1	2382_1_4	2016-05-12	w	1.7	iron3	2016-06-09	28	7.7	41	20.98	.	.	.	.	.	.
2382	1	2382_1	2382_1_1	2016-05-12	w	1.9	iron2	2016-06-09	28	7.2	39	18	.	.	.	.	.	.
2383	1	2383_1	2383_1_6	2016-05-10	w	1.4	iron2	2016-06-09	30	9.4	37	24.29	.	.	.	.	.	.
2383	1	2383_1	2383_1_3	2016-05-10	m	1.6	iron3	2016-06-09	30	9.5	34	16.63	.	.	.	.	.	.
2383	1	2383_1	2383_1_7	2016-05-10	w	1.4	iron2	2016-06-09	30	8.2	32	5.6	.	.	.	.	.	.
2383	1	2383_1	2383_1_10	2016-05-10	m	1.3	iron2	2016-06-09	30	8.1	36	27.74	.	.	.	.	.	.
2383	1	2383_1	2383_1_4	2016-05-10	w	1.6	iron3	2016-06-09	30	9.6	36	15.25	.	.	.	.	.	.
2383	1	2383_1	2383_1_5	2016-05-10	w	1.5	iron3	2016-06-09	30	8.5	38	18.61	.	.	.	.	.	.
2383	1	2383_1	2383_1_2	2016-05-10	w	1.7	iron1	2016-06-09	30	9.4	28	4.01	.	.	.	.	.	.
2383	1	2383_1	2383_1_9	2016-05-10	w	1.3	iron1	2016-06-09	30	8.1	28	4.95	.	.	.	.	.	.
2383	1	2383_1	2383_1_1	2016-05-10	m	1.9	iron1	2016-06-09	30	9.3	28	3.36	.	.	.	.	.	.
5532	1	5532_1	5532_1_3	2016-05-23	w	1.8	iron2	2016-06-21	29	8.4	42	24.38	.	.	.	.	.	.
5532	1	5532_1	5532_1_5	2016-05-23	m	1.8	iron3	2016-06-21	29	7.8	36	22.91	.	.	.	.	.	.
5532	1	5532_1	5532_1_8	2016-05-23	w	1.7	iron1	2016-06-21	29	8.8	36	5.34	.	.	.	.	.	.
5532	1	5532_1	5532_1_1	2016-05-23	w	1.9	iron3	2016-06-21	29	9.5	30	20.33	.	.	.	.	.	.
5532	1	5532_1	5532_1_12	2016-05-23	m	1.2	iron1	2016-06-21	29	7.3	33	2.28	.	.	.	.	.	.
5532	1	5532_1	5532_1_2	2016-05-23	w	1.9	iron1	2016-06-21	29	9.5	32	6.98	.	.	.	.	.	.
5532	1	5532_1	5532_1_11	2016-05-23	m	1.4	iron2	2016-06-21	29	6.4	39	23.43	.	.	.	.	.	.
5532	1	5532_1	5532_1_9	2016-05-23	w	1.4	iron3	2016-06-21	29	8	41	16.97	.	.	.	.	.	.
5532	1	5532_1	5532_1_7	2016-05-23	w	1.7	iron2	2016-06-21	29	7.9	38	17.96	.	.	.	.	.	.
5014	8	5014_8	5014_8_8	2016-05-15	w	1.8	iron1	2016-06-14	30	10	29	6.55	.	.	.	.	.	.
5014	8	5014_8	5014_8_3	2016-05-15	w	2.2	iron1	2016-06-14	30	11.3	21	3.57	.	.	.	.	.	.
5014	8	5014_8	5014_8_7	2016-05-15	w	1.8	iron1	2016-06-14	30	9.7	30	3.92	.	.	.	.	.	.
5014	8	5014_8	5014_8_1	2016-05-15	w	2.2	iron2	2016-06-14	30	11.6	41	19.51	.	.	.	.	.	.
5014	8	5014_8	5014_8_6	2016-05-15	w	2	iron2	2016-06-14	30	12	43	23	.	.	.	.	.	.
5014	8	5014_8	5014_8_11	2016-05-15	w	1.6	iron3	2016-06-14	30	8.4	45	26.1	.	.	.	.	.	.
5014	8	5014_8	5014_8_4	2016-05-15	w	2.1	iron3	2016-06-14	30	10.7	42	23.09	.	.	.	.	.	.
5014	8	5014_8	5014_8_5	2016-05-15	w	1.9	iron2	2016-06-14	30	10.9	39	16.93	.	.	.	.	.	.
5014	8	5014_8	5014_8_10	2016-05-15	m	1.6	iron3	2016-06-14	30	6.9	44	11.5	.	.	.	.	.	.
48241	1	48241_1	48241_1_9	2016-06-04	m	1.1	iron3	2016-07-01	27	6.2	42	24.34	.	.	.	.	.	.
48241	1	48241_1	48241_1_7	2016-06-04	m	1.1	iron1	2016-07-01	27	4.8	14	2.54	.	.	.	.	.	.
48241	1	48241_1	48241_1_12	2016-06-04	w	0.7	iron2	2016-07-01	27	4.8	40	37.34	.	.	.	.	.	.
48241	1	48241_1	48241_1_4	2016-06-04	w	1.1	iron3	2016-07-01	27	5.4	42	29.63	.	.	.	.	.	.
48241	1	48241_1	48241_1_8	2016-06-04	m	1.1	iron2	2016-07-01	27	6	40	23.6	.	.	.	.	.	.
48241	1	48241_1	48241_1_1	2016-06-04	m	1.3	iron3	2016-07-01	27	6.4	43	20.85	.	.	.	.	.	.
48241	1	48241_1	48241_1_3	2016-06-04	w	1.2	iron2	2016-07-01	27	6	41	25.8	.	.	.	.	.	.
48241	1	48241_1	48241_1_2	2016-06-04	m	1.2	iron1	2016-07-01	27	5.7	34	6.42	.	.	.	.	.	.
48241	1	48241_1	48241_1_5	2016-06-04	w	1.1	iron1	2016-07-01	27	6	36	10.29	.	.	.	.	.	.
51932	3	51932_3	51932_3_7	2016-06-16	m	1.2	iron1	2016-07-14	28	8.3	31	7.11	.	.	.	.	.	.
51932	3	51932_3	51932_3_9	2016-06-16	m	1.1	iron3	2016-07-14	28	7.8	42	27.39	.	.	.	.	.	.
51932	3	51932_3	51932_3_10	2016-06-16	w	1.1	iron3	2016-07-14	28	.	.	.	.	.	.	.	.	.
51932	3	51932_3	51932_3_8	2016-06-16	w	1.2	iron1	2016-07-14	28	9	35	3.19	.	.	.	.	.	.
51932	3	51932_3	51932_3_3	2016-06-16	w	1.3	iron3	2016-07-14	28	8.5	42	28.69	.	.	.	.	.	.
51932	3	51932_3	51932_3_2	2016-06-16	m	1.6	iron1	2016-07-14	28	9.6	31	2.33	.	.	.	.	.	.
51932	3	51932_3	51932_3_5	2016-06-16	m	1.3	iron2	2016-07-14	28	6.4	39	28	.	.	.	.	.	.
51932	3	51932_3	51932_3_6	2016-06-16	w	1.3	iron2	2016-07-14	28	7.3	42	28.47	.	.	.	.	.	.
51932	3	51932_3	51932_3_4	2016-06-16	w	1.3	iron2	2016-07-14	28	9.4	39	22.35	.	.	.	.	.	.
51941	3	51941_3	51941_3_7	2016-06-16	w	1	iron1	2016-07-14	28	6.3	37	5.34	.	.	.	.	.	.
51941	3	51941_3	51941_3_4	2016-06-16	w	1.3	iron1	2016-07-14	28	8.4	29	3.45	.	.	.	.	.	.
51941	3	51941_3	51941_3_2	2016-06-16	w	1.4	iron3	2016-07-14	28	9.2	40	25.15	.	.	.	.	.	.
51941	3	51941_3	51941_3_9	2016-06-16	m	0.8	iron1	2016-07-14	28	8.3	32	4.48	.	.	.	.	.	.
51941	3	51941_3	51941_3_3	2016-06-16	w	1.3	iron2	2016-07-14	28	9.3	30	4.35	.	.	.	.	.	.
51941	3	51941_3	51941_3_8	2016-06-16	w	0.9	iron2	2016-07-14	28	6.9	44	21.41	.	.	.	.	.	.
51941	3	51941_3	51941_3_10	2016-06-16	m	0.8	iron2	2016-07-14	28	.	.	.	.	.	.	.	.	.
51941	3	51941_3	51941_3_5	2016-06-16	m	1.2	iron3	2016-07-14	28	7.6	38	26.32	.	.	.	.	.	.
51941	3	51941_3	51941_3_6	2016-06-16	w	1.1	iron3	2016-07-14	28	.	.	.	.	.	.	.	.	.
564	6	564_6	564_6_2	2016-03-18	m	2.2	iron3	2016-04-14	27	11.6	40	21.41	.	.	.	.	.	.
564	6	564_6	564_6_3	2016-03-18	m	2.2	iron2	2016-04-14	27	12.3	35	5.99	.	.	.	.	.	.
564	6	564_6	564_6_4	2016-03-18	m	2.2	iron2	2016-04-14	27	12.1	32	6.03	.	.	.	.	.	.
564	6	564_6	564_6_1	2016-03-18	w	2.4	iron3	2016-04-14	27	9.2	40	26.75	.	.	.	.	.	.
564	6	564_6	564_6_11	2016-03-18	w	1.1	iron2	2016-04-14	27	9.5	39	15.63	.	.	.	.	.	.
564	6	564_6	564_6_5	2016-03-18	w	1.2	iron3	2016-04-14	27	11.5	40	20.37	.	.	.	.	.	.
564	6	564_6	564_6_6	2016-03-18	w	2.1	iron1	2016-04-14	27	12.9	24	1.81	.	.	.	.	.	.
564	6	564_6	564_6_7	2016-03-18	w	1.9	iron1	2016-04-14	27	9.8	28	1.98	.	.	.	.	.	.
564	6	564_6	564_6_8	2016-03-18	m	1.4	iron1	2016-04-14	27	8.9	30	2.07	.	.	.	.	.	.
562	8	562_8	562_8_3	2016-04-29	m	1.5	iron1	2016-05-25	26	6.5	35	5.69	.	.	.	.	.	.
562	8	562_8	562_8_6	2016-04-29	w	1.3	iron3	2016-05-25	26	8	39	28.69	.	.	.	.	.	.
562	8	562_8	562_8_7	2016-04-29	w	1.3	iron3	2016-05-25	26	8.4	43	24.42	.	.	.	.	.	.
562	8	562_8	562_8_8	2016-04-29	w	1.3	iron1	2016-05-25	26	7	37	3.1	.	.	.	.	.	.
562	8	562_8	562_8_9	2016-04-29	w	1.3	iron3	2016-05-25	26	7.9	43	31.66	.	.	.	.	.	.
562	8	562_8	562_8_10	2016-04-29	w	1.3	iron1	2016-05-25	26	4.6	41	16.75	.	.	.	.	.	.
562	8	562_8	562_8_11	2016-04-29	w	1.3	iron2	2016-05-25	26	8.4	39	8.18	.	.	.	.	.	.
562	8	562_8	562_8_12	2016-04-29	w	1.2	iron2	2016-05-25	26	8.3	42	20.63	.	.	.	.	.	.
562	8	562_8	562_8_13	2016-04-29	m	1.2	iron2	2016-05-25	26	7.3	41	22.4	.	.	.	.	.	.
544	3	544_3	544_3_9	2016-04-26	w	1.5	iron1	2016-05-25	29	8.8	30	2.54	.	.	.	.	.	.
544	3	544_3	544_3_12	2016-04-26	w	1.3	iron1	2016-05-25	29	9	30	3.14	.	.	.	.	.	.
544	3	544_3	544_3_8	2016-04-26	m	1.5	iron3	2016-05-25	29	8.1	40	30.62	.	.	.	.	.	.
544	3	544_3	544_3_11	2016-04-26	w	1.4	iron1	2016-05-25	29	9.7	30	2.97	.	.	.	.	.	.
544	3	544_3	544_3_15	2016-04-26	m	0.9	iron3	2016-05-25	29	5.6	42	29.2	.	.	.	.	.	.
544	3	544_3	544_3_13	2016-04-26	m	1.1	iron3	2016-05-25	29	.	.	.	.	.	.	.	.	.
544	3	544_3	544_3_10	2016-04-26	w	1.4	iron2	2016-05-25	29	9.5	40	10.9	.	.	.	.	.	.
544	3	544_3	544_3_7	2016-04-26	w	1.6	iron2	2016-05-25	29	11.5	30	5.38	.	.	.	.	.	.
544	3	544_3	544_3_6	2016-04-26	m	1.8	iron2	2016-05-25	29	11.3	37	7.02	.	.	.	.	.	.
2381	3	2381_3	2381_3_6	2016-07-28	w	1.5	iron3	2016-08-25	28	9	40	21.66	.	.	.	.	.	.
2381	3	2381_3	2381_3_9	2016-07-28	w	1.5	iron3	2016-08-25	28	9.1	41	21.97	.	.	.	.	.	.
2381	3	2381_3	2381_3_12	2016-07-28	w	1.3	iron2	2016-08-25	28	8.5	37	7.88	.	.	.	.	.	.
2381	3	2381_3	2381_3_11	2016-07-28	m	1.4	iron3	2016-08-25	28	6.8	40	24.21	.	.	.	.	.	.
2381	3	2381_3	2381_3_7	2016-07-28	m	1.5	iron2	2016-08-25	28	7.5	41	25.67	.	.	.	.	.	.
2381	3	2381_3	2381_3_1	2016-07-28	m	1.7	iron2	2016-08-25	28	6.7	40	26.49	.	.	.	.	.	.
2381	3	2381_3	2381_3_10	2016-07-28	m	1.5	iron1	2016-08-25	28	8	29	4.87	.	.	.	.	.	.
2381	3	2381_3	2381_3_4	2016-07-28	w	1.6	iron1	2016-08-25	28	8.8	34	5.08	.	.	.	.	.	.
2381	3	2381_3	2381_3_5	2016-07-28	w	1.6	iron1	2016-08-25	28	8.8	29	2.63	.	.	.	.	.	.
51931	8	51931_8	51931_8_2	2016-07-29	m	1.7	iron3	2016-08-25	27	7.6	43	25.76	.	.	.	.	.	.
51931	8	51931_8	51931_8_12	2016-07-29	w	1.4	iron3	2016-08-25	27	7.1	43	25.8	.	.	.	.	.	.
51931	8	51931_8	51931_8_6	2016-07-29	m	1.6	iron2	2016-08-25	27	8.8	37	16.45	.	.	.	.	.	.
51931	8	51931_8	51931_8_7	2016-07-29	w	1.6	iron3	2016-08-25	27	9.7	44	39.19	.	.	.	.	.	.
51931	8	51931_8	51931_8_4	2016-07-29	m	1.6	iron2	2016-08-25	27	8.6	39	25.2	.	.	.	.	.	.
51931	8	51931_8	51931_8_9	2016-07-29	m	1.5	iron2	2016-08-25	27	9.5	41	15.42	.	.	.	.	.	.
51931	8	51931_8	51931_8_10	2016-07-29	m	1.4	iron1	2016-08-25	27	7	27	3.92	.	.	.	.	.	.
51931	8	51931_8	51931_8_3	2016-07-29	m	1.7	iron1	2016-08-25	27	9.1	29	2.71	.	.	.	.	.	.
51931	8	51931_8	51931_8_1	2016-07-29	m	1.8	iron1	2016-08-25	27	8.2	35	2.28	.	.	.	.	.	.
5533	2	5533_2	5533_2_3	2016-07-28	m	1.8	iron2	2016-08-25	28	9.8	37	16.45	.	.	.	.	.	.
5533	2	5533_2	5533_2_11	2016-07-28	m	1.3	iron2	2016-08-25	28	6.7	40	25.15	.	.	.	.	.	.
5533	2	5533_2	5533_2_2	2016-07-28	m	1.8	iron2	2016-08-25	28	8	43	24.12	.	.	.	.	.	.
5533	2	5533_2	5533_2_6	2016-07-28	m	1.5	iron1	2016-08-25	28	7	31	8.96	.	.	.	.	.	.
5533	2	5533_2	5533_2_10	2016-07-28	w	1.3	iron1	2016-08-25	28	5.7	37	3.1	.	.	.	.	.	.
5533	2	5533_2	5533_2_8	2016-07-28	m	1.5	iron1	2016-08-25	28	7.3	27	3.79	.	.	.	.	.	.
5533	2	5533_2	5533_2_5	2016-07-28	w	1.6	iron3	2016-08-25	28	7.7	34	36.14	.	.	.	.	.	.
5533	2	5533_2	5533_2_1	2016-07-28	m	1.9	iron3	2016-08-25	28	9.4	39	24.64	.	.	.	.	.	.
5533	2	5533_2	5533_2_4	2016-07-28	w	1.7	iron3	2016-08-25	28	7.4	37	28.38	.	.	.	.	.	.
5524	7	5524_7	5524_7_1	2016-08-01	m	2.2	iron1	2016-08-30	29	4.9	22	2.89	.	.	.	.	.	.
5524	7	5524_7	5524_7_9	2016-08-01	w	0.9	iron3	2016-08-30	29	.	.	.	.	.	.	.	.	.
5524	7	5524_7	5524_7_8	2016-08-01	m	1.6	iron2	2016-08-30	29	6.5	43	9.3	.	.	.	.	.	.
5524	7	5524_7	5524_7_3	2016-08-01	w	1.9	iron3	2016-08-30	29	6.4	37	31.61	.	.	.	.	.	.
5524	7	5524_7	5524_7_7	2016-08-01	w	1.7	iron2	2016-08-30	29	7	35	20.76	.	.	.	.	.	.
5524	7	5524_7	5524_7_5	2016-08-01	w	1.9	iron1	2016-08-30	29	3.6	19	1.51	.	.	.	.	.	.
5524	7	5524_7	5524_7_4	2016-08-01	m	1.9	iron2	2016-08-30	29	4.2	32	19.3	.	.	.	.	.	.
5524	7	5524_7	5524_7_6	2016-08-01	w	1.8	iron1	2016-08-30	29	4	18	1.72	.	.	.	.	.	.
5524	7	5524_7	5524_7_2	2016-08-01	w	2	iron3	2016-08-30	29	8.2	37	18.43	.	.	.	.	.	.
48242	1	48242_1	48242_1_2	2016-08-03	m	1.4	iron2	2016-08-30	27	6.1	37	16.45	.	.	.	.	.	.
48242	1	48242_1	48242_1_6	2016-08-03	w	1.1	iron2	2016-08-30	27	5.7	44	25.15	.	.	.	.	.	.
48242	1	48242_1	48242_1_1	2016-08-03	w	1.4	iron2	2016-08-30	27	4.9	40	24.12	.	.	.	.	.	.
48242	1	48242_1	48242_1_7	2016-08-03	w	1.1	iron1	2016-08-30	27	4.9	41	8.96	.	.	.	.	.	.
48242	1	48242_1	48242_1_9	2016-08-03	w	0.9	iron1	2016-08-30	27	5.6	32	3.1	.	.	.	.	.	.
48242	1	48242_1	48242_1_5	2016-08-03	w	1.2	iron1	2016-08-30	27	5.4	34	3.79	.	.	.	.	.	.
48242	1	48242_1	48242_1_8	2016-08-03	m	1	iron3	2016-08-30	27	5.1	45	36.14	.	.	.	.	.	.
48242	1	48242_1	48242_1_3	2016-08-03	m	1.2	iron3	2016-08-30	27	6.1	42	24.64	.	.	.	.	.	.
48242	1	48242_1	48242_1_4	2016-08-03	m	1.2	iron3	2016-08-30	27	6.3	44	28.38	.	.	.	.	.	.
48243	1	48243_1	48243_1_11	2016-08-09	m	1.3	iron1	2016-09-06	28	6.9	32	10.25	.	.	.	.	.	.
48243	1	48243_1	48243_1_2	2016-08-09	w	1.6	iron2	2016-09-06	28	7.3	41	8.66	.	.	.	.	.	.
48243	1	48243_1	48243_1_5	2016-08-09	w	1.6	iron1	2016-09-06	28	7.2	31	4.65	.	.	.	.	.	.
48243	1	48243_1	48243_1_9	2016-08-09	w	1.4	iron1	2016-09-06	28	7.9	37	12.19	.	.	.	.	.	.
48243	1	48243_1	48243_1_3	2016-08-09	m	1.6	iron2	2016-09-06	28	7.4	39	26.66	.	.	.	.	.	.
48243	1	48243_1	48243_1_10	2016-08-09	w	1.4	iron2	2016-09-06	28	6.4	37	24.51	.	.	.	.	.	.
48243	1	48243_1	48243_1_1	2016-08-09	m	1.8	iron3	2016-09-06	28	6.4	39	30.19	.	.	.	.	.	.
48243	1	48243_1	48243_1_4	2016-08-09	w	1.6	iron3	2016-09-06	28	8.1	41	22.4	.	.	.	.	.	.
48243	1	48243_1	48243_1_8	2016-08-09	m	1.4	iron3	2016-09-06	28	7.5	42	26.4	.	.	.	.	.	.
5526	2	5526_2	5526_2_10	2016-08-13	w	1.8	iron1	2016-09-09	27	7	34	5.21	.	.	.	.	.	.
5526	2	5526_2	5526_2_5	2016-08-13	w	2	iron3	2016-09-09	27	8.8	40	27.13	.	.	.	.	.	.
5526	2	5526_2	5526_2_4	2016-08-13	w	2.1	iron3	2016-09-09	27	7.8	40	28.47	.	.	.	.	.	.
5526	2	5526_2	5526_2_12	2016-08-13	m	1.4	iron1	2016-09-09	27	7.1	31	3.36	.	.	.	.	.	.
5526	2	5526_2	5526_2_6	2016-08-13	w	2	iron3	2016-09-09	27	7.4	41	31.4	.	.	.	.	.	.
5526	2	5526_2	5526_2_9	2016-08-13	w	1.8	iron1	2016-09-09	27	9	28	2.97	.	.	.	.	.	.
5526	2	5526_2	5526_2_1	2016-08-13	w	2.2	iron2	2016-09-09	27	8.3	40	26.27	.	.	.	.	.	.
5526	2	5526_2	5526_2_7	2016-08-13	w	1.9	iron2	2016-09-09	27	8	39	25.58	.	.	.	.	.	.
5526	2	5526_2	5526_2_2	2016-08-13	m	2.2	iron2	2016-09-09	27	10	37	14.43	.	.	.	.	.	.
543	3	543_3	543_3_1	2016-10-19	w	2	iron2	2016-11-16	28	10	40	23.56	.	.	.	.	.	.
543	3	543_3	543_3_10	2016-10-19	w	1.3	iron1	2016-11-16	28	8.4	33	2.2	.	.	.	.	.	.
543	3	543_3	543_3_2	2016-10-19	w	1.7	iron1	2016-11-16	28	9.75	31	1.94	.	.	.	.	.	.
543	3	543_3	543_3_11	2016-10-19	w	1.2	iron2	2016-11-16	28	7.6	43	10.08	.	.	.	.	.	.
543	3	543_3	543_3_9	2016-10-19	m	1.3	iron1	2016-11-16	28	7.8	32	2.33	.	.	.	.	.	.
543	3	543_3	543_3_8	2016-10-19	m	1.3	iron2	2016-11-16	28	7.3	42	13.35	.	.	.	.	.	.
543	3	543_3	543_3_5	2016-10-19	w	1.5	iron3	2016-11-16	28	10.2	42	23.3	.	.	.	.	.	.
543	3	543_3	543_3_6	2016-10-19	w	1.4	iron3	2016-11-16	28	8.5	42	33.42	.	.	.	.	.	.
543	3	543_3	543_3_4	2016-10-19	w	1.6	iron3	2016-11-16	28	8.6	43	28.04	.	.	.	.	.	.
544	4	544_4	544_4_2	2016-10-07	w	1.6	iron1	2016-11-03	27	8.4	37	4.35	.	.	.	.	.	.
544	4	544_4	544_4_5	2016-10-07	m	1.3	iron3	2016-11-03	27	9.7	44	32.91	.	.	.	.	.	.
544	4	544_4	544_4_1	2016-10-07	m	1.9	iron1	2016-11-03	27	9.4	31	3.01	.	.	.	.	.	.
544	4	544_4	544_4_9	2016-10-07	m	1	iron1	2016-11-03	27	7.6	27	2.5	.	.	.	.	.	.
544	4	544_4	544_4_8	2016-10-07	m	1.1	iron3	2016-11-03	27	7.8	47	35.96	.	.	.	.	.	.
544	4	544_4	544_4_4	2016-10-07	m	1.4	iron2	2016-11-03	27	8.8	43	26.62	.	.	.	.	.	.
544	4	544_4	544_4_6	2016-10-07	w	1.2	iron3	2016-11-03	27	7.1	47	27.05	.	.	.	.	.	.
544	4	544_4	544_4_7	2016-10-07	m	1.2	iron2	2016-11-03	27	6.4	38	15.51	.	.	.	.	.	.
544	4	544_4	544_4_3	2016-10-07	m	1.6	iron2	2016-11-03	27	9.9	40	8.4	.	.	.	.	.	.
561	9	561_9	561_9_4	2016-09-01	w	1.5	iron2	2016-09-29	28	7.4	37	33.12	.	.	.	.	.	.
561	9	561_9	561_9_11	2016-09-01	w	1.2	iron3	2016-09-29	28	7.3	47	36.27	.	.	.	.	.	.
561	9	561_9	561_9_2	2016-09-01	w	1.5	iron2	2016-09-29	28	8.5	43	31.36	.	.	.	.	.	.
561	9	561_9	561_9_5	2016-09-01	m	1.5	iron3	2016-09-29	28	7.3	42	28.94	.	.	.	.	.	.
561	9	561_9	561_9_1	2016-09-01	w	1.6	iron3	2016-09-29	28	8.4	40	29.46	.	.	.	.	.	.
561	9	561_9	561_9_7	2016-09-01	w	1.4	iron2	2016-09-29	28	6.9	37	32.22	.	.	.	.	.	.
561	9	561_9	561_9_8	2016-09-01	m	1.3	iron1	2016-09-29	28	6.9	37	8.74	.	.	.	.	.	.
561	9	561_9	561_9_13	2016-09-01	m	1.2	iron1	2016-09-29	28	5.2	37	6.76	.	.	.	.	.	.
561	9	561_9	561_9_3	2016-09-01	w	1.5	iron1	2016-09-29	28	7.2	37	4.82	.	.	.	.	.	.
562	9	562_9	562_9_4	2016-10-06	w	1.6	iron1	2016-11-03	28	8.5	36	7.49	.	.	.	.	.	.
562	9	562_9	562_9_3	2016-10-06	w	1.8	iron1	2016-11-03	28	9.9	35	10.38	.	.	.	.	.	.
562	9	562_9	562_9_8	2016-10-06	w	1.4	iron2	2016-11-03	28	8.3	41	40.06	.	.	.	.	.	.
562	9	562_9	562_9_2	2016-10-06	w	1.9	iron2	2016-11-03	28	9.3	38	42.73	.	.	.	.	.	.
562	9	562_9	562_9_5	2016-10-06	m	1.6	iron3	2016-11-03	28	8.4	41	28.68	.	.	.	.	.	.
562	9	562_9	562_9_6	2016-10-06	m	1.4	iron1	2016-11-03	28	7.9	33	8.61	.	.	.	.	.	.
562	9	562_9	562_9_7	2016-10-06	m	1.4	iron2	2016-11-03	28	8.5	40	28.86	.	.	.	.	.	.
562	9	562_9	562_9_11	2016-10-06	w	1.3	iron3	2016-11-03	28	8.5	42	.	.	.	.	.	.	.
562	9	562_9	562_9_1	2016-10-06	w	1.9	iron3	2016-11-03	28	10.4	39	33.12	.	.	.	.	.	.
1911	7	1911_7	1911_7_4	2016-10-07	m	1.8	iron3	2016-11-03	27	9.4	40	27.05	.	.	.	.	.	.
1911	7	1911_7	1911_7_7	2016-10-07	w	1.3	iron3	2016-11-03	27	7	41	21.84	.	.	.	.	.	.
1911	7	1911_7	1911_7_1	2016-10-07	m	2	iron3	2016-11-03	27	9.2	42	23.65	.	.	.	.	.	.
1911	7	1911_7	1911_7_3	2016-10-07	w	1.8	iron2	2016-11-03	27	8.5	42	28.94	.	.	.	.	.	.
1911	7	1911_7	1911_7_2	2016-10-07	w	1.8	iron2	2016-11-03	27	8.5	41	23.26	.	.	.	.	.	.
1911	7	1911_7	1911_7_5	2016-10-07	w	1.7	iron2	2016-11-03	27	8.5	42	18.74	.	.	.	.	.	.
1911	7	1911_7	1911_7_10	2016-10-07	w	1.8	iron1	2016-11-03	27	8.3	27	2.67	.	.	.	.	.	.
1911	7	1911_7	1911_7_8	2016-10-07	w	1.1	iron1	2016-11-03	27	4.1	37	42.21	.	.	.	.	.	.
1911	7	1911_7	1911_7_6	2016-10-07	m	1.5	iron1	2016-11-03	27	9.2	33	2.15	.	.	.	.	.	.
1913	1	1913_1	1913_1_2	2016-10-10	m	1.2	iron1	.	.	.	.	5.86	.	.	.	.	.	.
1913	1	1913_1	1913_1_6	2016-10-10	m	1.1	iron2	.	.	.	.	18.09	.	.	.	.	.	.
1913	1	1913_1	1913_1_7	2016-10-10	m	1	iron3	.	.	.	.	23.43	.	.	.	.	.	.
1913	1	1913_1	1913_1_5	2016-10-10	w	1.1	iron1	.	.	.	.	6.93	.	.	.	.	.	.
1913	1	1913_1	1913_1_1	2016-10-10	m	1.4	iron2	.	.	.	.	32.09	.	.	.	.	.	.
1913	1	1913_1	1913_1_4	2016-10-10	m	1.2	iron1	.	.	.	.	11.97	.	.	.	.	.	.
1913	1	1913_1	1913_1_10	2016-10-10	m	1	iron2	.	.	.	.	24.34	.	.	.	.	.	.
1913	1	1913_1	1913_1_3	2016-10-10	w	1.2	iron3	.	.	.	.	28.21	.	.	.	.	.	.
1913	1	1913_1	1913_1_9	2016-10-10	w	1	iron3	.	.	.	.	26.79	.	.	.	.	.	.
1915	2	1915_2	1915_2_2	2016-10-19	w	1.7	iron1	2016-11-16	28	8.3	26	3.01	.	.	.	.	.	.
1915	2	1915_2	1915_2_3	2016-10-19	m	1.5	iron1	2016-11-16	28	9.4	30	3.53	.	.	.	.	.	.
1915	2	1915_2	1915_2_1	2016-10-19	w	1.8	iron1	2016-11-16	28	9.3	28	.	.	.	.	.	.	.
1915	2	1915_2	1915_2_7	2016-10-19	w	1.3	iron3	2016-11-16	28	8.2	44	28.13	.	.	.	.	.	.
1915	2	1915_2	1915_2_9	2016-10-19	w	1.3	iron3	2016-11-16	28	8.2	41	28.81	.	.	.	.	.	.
1915	2	1915_2	1915_2_10	2016-10-19	m	1.3	iron3	2016-11-16	28	8.8	41	12.66	.	.	.	.	.	.
1915	2	1915_2	1915_2_4	2016-10-19	m	1.5	iron2	2016-11-16	28	8.3	40	5.81	.	.	.	.	.	.
1915	2	1915_2	1915_2_5	2016-10-19	m	1.4	iron2	2016-11-16	28	8.5	41	5.73	.	.	.	.	.	.
1915	2	1915_2	1915_2_6	2016-10-19	w	1.3	iron2	2016-11-16	28	8.2	40	17.06	.	.	.	.	.	.
2111	1	2111_1	2111_1_13	2016-09-02	w	0.9	iron1	2016-09-29	27	4.8	35	6.68	.	.	.	.	.	.
2111	1	2111_1	2111_1_5	2016-09-02	m	1.3	iron1	2016-09-29	27	5.9	34	5.51	.	.	.	.	.	.
2111	1	2111_1	2111_1_2	2016-09-02	m	1.4	iron3	2016-09-29	27	6	45	26.96	.	.	.	.	.	.
2111	1	2111_1	2111_1_8	2016-09-02	w	1.2	iron1	2016-09-29	27	5.1	38	19.55	.	.	.	.	.	.
2111	1	2111_1	2111_1_1	2016-09-02	w	1.5	iron3	2016-09-29	27	5.9	43	18.26	.	.	.	.	.	.
2111	1	2111_1	2111_1_3	2016-09-02	w	1.4	iron2	2016-09-29	27	5.6	34	7.02	.	.	.	.	.	.
2111	1	2111_1	2111_1_7	2016-09-02	m	1.3	iron3	2016-09-29	27	4.5	46	25.33	.	.	.	.	.	.
2111	1	2111_1	2111_1_10	2016-09-02	w	1	iron2	2016-09-29	27	5.2	40	26.36	.	.	.	.	.	.
2111	1	2111_1	2111_1_6	2016-09-02	w	1.3	iron2	2016-09-29	27	4.6	53	24.34	.	.	.	.	.	.
2382	2	2382_2	2382_2_4	2016-10-24	m	1.7	iron2	2016-11-22	29	8.3	42	17.96	.	.	.	.	.	.
2382	2	2382_2	2382_2_6	2016-10-24	m	1.5	iron2	2016-11-22	29	8.2	44	31.4	.	.	.	.	.	.
2382	2	2382_2	2382_2_12	2016-10-24	w	1.1	iron2	2016-11-22	29	7.05	43	19.6	.	.	.	.	.	.
2382	2	2382_2	2382_2_7	2016-10-24	w	1.3	iron1	2016-11-22	29	7.3	37	3.23	.	.	.	.	.	.
2382	2	2382_2	2382_2_1	2016-10-24	m	2.1	iron2	2016-11-22	29	9.95	41	31.23	.	.	.	.	.	.
2382	2	2382_2	2382_2_5	2016-10-24	w	1.6	iron2	2016-11-22	29	8.15	42	28.17	.	.	.	.	.	.
2382	2	2382_2	2382_2_8	2016-10-24	w	1.2	iron2	2016-11-22	29	6.1	42	20.89	.	.	.	.	.	.
2382	2	2382_2	2382_2_3	2016-10-24	m	1.7	iron1	2016-11-22	29	6.95	40	11.03	.	.	.	.	.	.
2382	2	2382_2	2382_2_2	2016-10-24	w	1.8	iron1	2016-11-22	29	8.35	37	3.83	.	.	.	.	.	.
2383	2	2383_2	2383_2_3	2016-10-22	w	1.7	iron3	2016-11-18	27	8.4	37	28.86	.	.	.	.	.	.
2383	2	2383_2	2383_2_1	2016-10-22	w	1.9	iron3	2016-11-18	27	9.1	42	27.52	.	.	.	.	.	.
2383	2	2383_2	2383_2_5	2016-10-22	m	1.5	iron3	2016-11-18	27	9.11	.	.	.	.	.	.	.	.
2383	2	2383_2	2383_2_2	2016-10-22	m	1.7	iron1	2016-11-18	27	.	.	.	.	.	.	.	.	.
2383	2	2383_2	2383_2_7	2016-10-22	w	1.4	iron1	2016-11-18	27	8.1	39	15.98	.	.	.	.	.	.
2383	2	2383_2	2383_2_10	2016-10-22	m	1.3	iron1	2016-11-18	27	6.1	36	8.14	.	.	.	.	.	.
2383	2	2383_2	2383_2_9	2016-10-22	w	1.4	iron2	2016-11-18	27	7.2	40	15.38	.	.	.	.	.	.
2383	2	2383_2	2383_2_11	2016-10-22	w	1.3	iron2	2016-11-18	27	9.05	40	24.68	.	.	.	.	.	.
2383	2	2383_2	2383_2_4	2016-10-22	m	1.7	iron2	2016-11-18	27	8.8	41	23.34	.	.	.	.	.	.
5014	9	5014_9	5014_9_7	2016-10-20	w	1.6	iron2	2016-11-18	29	8.5	41	16.93	.	.	.	.	.	.
5014	9	5014_9	5014_9_5	2016-10-20	w	1.7	iron1	2016-11-18	29	6.8	32	2.76	.	.	.	.	.	.
5014	9	5014_9	5014_9_9	2016-10-20	m	1.3	iron3	2016-11-18	29	6.3	47	28.08	.	.	.	.	.	.
5014	9	5014_9	5014_9_3	2016-10-20	m	1.8	iron2	2016-11-18	29	9.7	37	13.57	.	.	.	.	.	.
5014	9	5014_9	5014_9_1	2016-10-20	w	2.1	iron1	2016-11-18	29	6.2	42	41.39	.	.	.	.	.	.
5014	9	5014_9	5014_9_4	2016-10-20	m	1.7	iron2	2016-11-18	29	9.2	40	8.4	.	.	.	.	.	.
5014	9	5014_9	5014_9_2	2016-10-20	w	1.8	iron1	2016-11-18	29	10.4	29	2.5	.	.	.	.	.	.
5014	9	5014_9	5014_9_6	2016-10-20	m	1.7	iron3	2016-11-18	29	9	43	29.5	.	.	.	.	.	.
5014	9	5014_9	5014_9_8	2016-10-20	m	1.5	iron3	2016-11-18	29	8.5	44	30.02	.	.	.	.	.	.
2381	2	2381_2	2381_2_4	2016-02-14	m	1.5	iron1	2016-03-31	46	.	.	.	.	.	.	.	.	.
2381	2	2381_2	2381_2_7	2016-02-14	w	1.5	iron3	2016-03-31	46	18.7	.	.	.	.	.	.	.	.
2381	2	2381_2	2381_2_9	2016-02-14	w	1.2	iron3	2016-03-31	46	14.7	.	.	.	.	.	.	.	.
2381	2	2381_2	2381_2_2	2016-02-14	m	1.6	iron1	2016-03-31	46	16.4	.	.	.	.	.	.	.	.
2381	2	2381_2	2381_2_1	2016-02-14	m	1.7	iron3	2016-03-31	46	16.9	.	.	.	.	.	.	.	.
2381	2	2381_2	2381_2_8	2016-02-14	m	1.4	iron1	2016-03-31	46	11.2	.	.	.	.	.	.	.	.
2381	2	2381_2	2381_2_6	2016-02-14	w	1.5	iron2	2016-03-31	46	13.4	.	.	.	.	.	.	.	.
2381	2	2381_2	2381_2_3	2016-02-14	m	1.5	iron2	2016-03-31	46	14.9	.	.	.	.	.	.	.	.
2381	2	2381_2	2381_2_5	2016-02-14	m	1.5	iron2	2016-03-31	46	15.5	.	.	.	.	.	.	.	.
5533	1	5533_1	5533_1_1	2016-02-15	m	2	iron3	2016-03-31	45	.	.	.	.	.	.	.	.	.
5533	1	5533_1	5533_1_10	2016-02-15	w	1.4	iron1	2016-03-31	45	8.8	.	.	.	.	.	.	.	.
5533	1	5533_1	5533_1_4	2016-02-15	w	1.6	iron3	2016-03-31	45	14.8	.	.	.	.	.	.	.	.
5533	1	5533_1	5533_1_6	2016-02-15	w	1.5	iron1	2016-03-31	45	14.6	.	.	.	.	.	.	.	.
5533	1	5533_1	5533_1_5	2016-02-15	w	1.5	iron2	2016-03-31	45	15.3	.	.	.	.	.	.	.	.
5533	1	5533_1	5533_1_7	2016-02-15	w	1.5	iron3	2016-03-31	45	10.7	.	.	.	.	.	.	.	.
5533	1	5533_1	5533_1_2	2016-02-15	m	1.8	iron2	2016-03-31	45	15.6	.	.	.	.	.	.	.	.
5533	1	5533_1	5533_1_12	2016-02-15	m	1.1	iron2	2016-03-31	45	12.6	.	.	.	.	.	.	.	.
5533	1	5533_1	5533_1_8	2016-02-15	w	1.5	iron1	2016-03-31	45	10.8	.	.	.	.	.	.	.	.
561	8	561_8	561_8_13	2016-03-02	w	1.2	iron3	2016-04-14	43	12.2	.	.	.	.	.	.	.	.
561	8	561_8	561_8_6	2016-03-02	w	1.5	iron2	2016-04-14	43	13.1	.	.	.	.	.	.	.	.
561	8	561_8	561_8_12	2016-03-02	w	1.3	iron3	2016-04-14	43	9.4	.	.	.	.	.	.	.	.
561	8	561_8	561_8_3	2016-03-02	w	1.9	iron1	2016-04-14	43	16.7	.	.	.	.	.	.	.	.
561	8	561_8	561_8_1	2016-03-02	m	2	iron2	2016-04-14	43	14.2	.	.	.	.	.	.	.	.
561	8	561_8	561_8_7	2016-03-02	w	1.5	iron3	2016-04-14	43	15	.	.	.	.	.	.	.	.
561	8	561_8	561_8_11	2016-03-02	m	1.4	iron2	2016-04-14	43	13.4	.	.	.	.	.	.	.	.
561	8	561_8	561_8_9	2016-03-02	w	1.4	iron1	2016-04-14	43	10	.	.	.	.	.	.	.	.
561	8	561_8	561_8_5	2016-03-02	m	1.5	iron1	2016-04-14	43	13.6	.	.	.	.	.	.	.	.
5526	1	5526_1	5526_1_1	2016-03-03	w	1.5	iron1	2016-04-14	42	9.2	.	.	.	.	.	.	.	.
5526	1	5526_1	5526_1_3	2016-03-03	w	1.4	iron3	2016-04-14	42	8.6	.	.	.	.	.	.	.	.
5526	1	5526_1	5526_1_4	2016-03-03	w	1.3	iron1	2016-04-14	42	9.8	.	.	.	.	.	.	.	.
5526	1	5526_1	5526_1_10	2016-03-03	m	1.1	iron3	2016-04-14	42	9.8	.	.	.	.	.	.	.	.
5526	1	5526_1	5526_1_9	2016-03-03	w	1.1	iron2	2016-04-14	42	7.3	.	.	.	.	.	.	.	.
5526	1	5526_1	5526_1_6	2016-03-03	m	1.2	iron3	2016-04-14	42	9.6	.	.	.	.	.	.	.	.
5526	1	5526_1	5526_1_8	2016-03-03	m	1.1	iron2	2016-04-14	42	9	.	.	.	.	.	.	.	.
5526	1	5526_1	5526_1_7	2016-03-03	w	1.2	iron2	2016-04-14	42	8.6	.	.	.	.	.	.	.	.
5526	1	5526_1	5526_1_2	2016-03-03	m	1.4	iron1	2016-04-14	42	8.9	.	.	.	.	.	.	.	.
2382	1	2382_1	2382_1_6	2016-05-12	w	1.5	iron1	2016-06-23	42	11.5	.	.	.	.	.	.	.	.
2382	1	2382_1	2382_1_2	2016-05-12	m	1.8	iron1	2016-06-23	42	12.2	.	.	.	.	.	.	.	.
2382	1	2382_1	2382_1_9	2016-05-12	w	1.2	iron3	2016-06-23	42	10.3	.	.	.	.	.	.	.	.
2382	1	2382_1	2382_1_5	2016-05-12	m	1.6	iron2	2016-06-23	42	12.2	.	.	.	.	.	.	.	.
2382	1	2382_1	2382_1_3	2016-05-12	w	1.8	iron1	2016-06-23	42	13.3	.	.	.	.	.	.	.	.
2382	1	2382_1	2382_1_7	2016-05-12	w	1.3	iron3	2016-06-23	42	12	.	.	.	.	.	.	.	.
2382	1	2382_1	2382_1_8	2016-05-12	w	1.3	iron2	2016-06-23	42	11.8	.	.	.	.	.	.	.	.
2382	1	2382_1	2382_1_4	2016-05-12	w	1.7	iron3	2016-06-23	42	12.3	.	.	.	.	.	.	.	.
2382	1	2382_1	2382_1_1	2016-05-12	w	1.9	iron2	2016-06-23	42	11.7	.	.	.	.	.	.	.	.
2383	1	2383_1	2383_1_6	2016-05-10	w	1.4	iron2	2016-06-23	44	14.4	.	.	.	.	.	.	.	.
2383	1	2383_1	2383_1_3	2016-05-10	m	1.6	iron3	2016-06-23	44	15	.	.	.	.	.	.	.	.
2383	1	2383_1	2383_1_7	2016-05-10	w	1.4	iron2	2016-06-23	44	14.1	.	.	.	.	.	.	.	.
2383	1	2383_1	2383_1_10	2016-05-10	m	1.3	iron2	2016-06-23	44	13.6	.	.	.	.	.	.	.	.
2383	1	2383_1	2383_1_4	2016-05-10	w	1.6	iron3	2016-06-23	44	14.8	.	.	.	.	.	.	.	.
2383	1	2383_1	2383_1_5	2016-05-10	w	1.5	iron3	2016-06-23	44	14.7	.	.	.	.	.	.	.	.
2383	1	2383_1	2383_1_2	2016-05-10	w	1.7	iron1	2016-06-23	44	14.3	.	.	.	.	.	.	.	.
2383	1	2383_1	2383_1_9	2016-05-10	w	1.3	iron1	2016-06-23	44	11.9	.	.	.	.	.	.	.	.
2383	1	2383_1	2383_1_1	2016-05-10	m	1.9	iron1	2016-06-23	44	14.6	.	.	.	.	.	.	.	.
5532	1	5532_1	5532_1_3	2016-05-23	w	1.8	iron2	2016-07-07	45	13.8	.	.	.	.	.	.	.	.
5532	1	5532_1	5532_1_5	2016-05-23	m	1.8	iron3	2016-07-07	45	13.6	.	.	.	.	.	.	.	.
5532	1	5532_1	5532_1_8	2016-05-23	w	1.7	iron1	2016-07-07	45	14.4	.	.	.	.	.	.	.	.
5532	1	5532_1	5532_1_1	2016-05-23	w	1.9	iron3	2016-07-07	45	15.6	.	.	.	.	.	.	.	.
5532	1	5532_1	5532_1_12	2016-05-23	m	1.2	iron1	2016-07-07	45	9.3	.	.	.	.	.	.	.	.
5532	1	5532_1	5532_1_2	2016-05-23	w	1.9	iron1	2016-07-07	45	14.2	.	.	.	.	.	.	.	.
5532	1	5532_1	5532_1_11	2016-05-23	m	1.4	iron2	2016-07-07	45	11.5	.	.	.	.	.	.	.	.
5532	1	5532_1	5532_1_9	2016-05-23	w	1.4	iron3	2016-07-07	45	12.9	.	.	.	.	.	.	.	.
5532	1	5532_1	5532_1_7	2016-05-23	w	1.7	iron2	2016-07-07	45	12.2	.	.	.	.	.	.	.	.
5014	8	5014_8	5014_8_8	2016-05-15	w	1.8	iron1	2016-06-23	39	12.2	.	.	.	.	.	.	.	.
5014	8	5014_8	5014_8_3	2016-05-15	w	2.2	iron1	2016-06-23	39	13.8	.	.	.	.	.	.	.	.
5014	8	5014_8	5014_8_7	2016-05-15	w	1.8	iron1	2016-06-23	39	11.9	.	.	.	.	.	.	.	.
5014	8	5014_8	5014_8_1	2016-05-15	w	2.2	iron2	2016-06-23	39	14.4	.	.	.	.	.	.	.	.
5014	8	5014_8	5014_8_6	2016-05-15	w	2	iron2	2016-06-23	39	16.3	.	.	.	.	.	.	.	.
5014	8	5014_8	5014_8_11	2016-05-15	w	1.6	iron3	2016-06-23	39	11.8	.	.	.	.	.	.	.	.
5014	8	5014_8	5014_8_4	2016-05-15	w	2.1	iron3	2016-06-23	39	13.7	.	.	.	.	.	.	.	.
5014	8	5014_8	5014_8_5	2016-05-15	w	1.9	iron2	2016-06-23	39	14.9	.	.	.	.	.	.	.	.
5014	8	5014_8	5014_8_10	2016-05-15	m	1.6	iron3	2016-06-23	39	9.8	.	.	.	.	.	.	.	.
48241	1	48241_1	48241_1_9	2016-06-04	m	1.1	iron3	.	.	.	.	.	.	.	.	.	.	.
48241	1	48241_1	48241_1_7	2016-06-04	m	1.1	iron1	.	.	.	.	.	.	.	.	.	.	.
48241	1	48241_1	48241_1_12	2016-06-04	w	0.7	iron2	.	.	.	.	.	.	.	.	.	.	.
48241	1	48241_1	48241_1_4	2016-06-04	w	1.1	iron3	.	.	.	.	.	.	.	.	.	.	.
48241	1	48241_1	48241_1_8	2016-06-04	m	1.1	iron2	.	.	.	.	.	.	.	.	.	.	.
48241	1	48241_1	48241_1_1	2016-06-04	m	1.3	iron3	.	.	.	.	.	.	.	.	.	.	.
48241	1	48241_1	48241_1_3	2016-06-04	w	1.2	iron2	.	.	.	.	.	.	.	.	.	.	.
48241	1	48241_1	48241_1_2	2016-06-04	m	1.2	iron1	.	.	.	.	.	.	.	.	.	.	.
48241	1	48241_1	48241_1_5	2016-06-04	w	1.1	iron1	.	.	.	.	.	.	.	.	.	.	.
51932	3	51932_3	51932_3_7	2016-06-16	m	1.2	iron1	2016-07-28	42	12.4	.	.	.	.	.	.	.	.
51932	3	51932_3	51932_3_9	2016-06-16	m	1.1	iron3	2016-07-28	42	12.8	.	.	.	.	.	.	.	.
51932	3	51932_3	51932_3_10	2016-06-16	w	1.1	iron3	2016-07-28	42	.	.	.	.	.	.	.	.	.
51932	3	51932_3	51932_3_8	2016-06-16	w	1.2	iron1	2016-07-28	42	13.1	.	.	.	.	.	.	.	.
51932	3	51932_3	51932_3_3	2016-06-16	w	1.3	iron3	2016-07-28	42	12.7	.	.	.	.	.	.	.	.
51932	3	51932_3	51932_3_2	2016-06-16	m	1.6	iron1	2016-07-28	42	12.8	.	.	.	.	.	.	.	.
51932	3	51932_3	51932_3_5	2016-06-16	m	1.3	iron2	2016-07-28	42	9.5	.	.	.	.	.	.	.	.
51932	3	51932_3	51932_3_6	2016-06-16	w	1.3	iron2	2016-07-28	42	10.5	.	.	.	.	.	.	.	.
51932	3	51932_3	51932_3_4	2016-06-16	w	1.3	iron2	2016-07-28	42	14.5	.	.	.	.	.	.	.	.
51941	3	51941_3	51941_3_7	2016-06-16	w	1	iron1	2016-07-28	42	9.8	.	.	.	.	.	.	.	.
51941	3	51941_3	51941_3_4	2016-06-16	w	1.3	iron1	2016-07-28	42	12.3	.	.	.	.	.	.	.	.
51941	3	51941_3	51941_3_2	2016-06-16	w	1.4	iron3	2016-07-28	42	14	.	.	.	.	.	.	.	.
51941	3	51941_3	51941_3_9	2016-06-16	m	0.8	iron1	2016-07-28	42	13.7	.	.	.	.	.	.	.	.
51941	3	51941_3	51941_3_3	2016-06-16	w	1.3	iron2	2016-07-28	42	11.4	.	.	.	.	.	.	.	.
51941	3	51941_3	51941_3_8	2016-06-16	w	0.9	iron2	2016-07-28	42	13.1	.	.	.	.	.	.	.	.
51941	3	51941_3	51941_3_10	2016-06-16	m	0.8	iron2	2016-07-28	42	.	.	.	.	.	.	.	.	.
51941	3	51941_3	51941_3_5	2016-06-16	m	1.2	iron3	2016-07-28	42	12.5	.	.	.	.	.	.	.	.
51941	3	51941_3	51941_3_6	2016-06-16	w	1.1	iron3	2016-07-28	42	.	.	.	.	.	.	.	.	.
564	6	564_6	564_6_2	2016-03-18	m	2.2	iron3	2016-04-28	41	18.4	.	.	.	.	.	.	.	.
564	6	564_6	564_6_3	2016-03-18	m	2.2	iron2	2016-04-28	41	21	.	.	.	.	.	.	.	.
564	6	564_6	564_6_4	2016-03-18	m	2.2	iron2	2016-04-28	41	18.3	.	.	.	.	.	.	.	.
564	6	564_6	564_6_1	2016-03-18	w	2.4	iron3	2016-04-28	41	15.6	.	.	.	.	.	.	.	.
564	6	564_6	564_6_11	2016-03-18	w	1.1	iron2	2016-04-28	41	15.4	.	.	.	.	.	.	.	.
564	6	564_6	564_6_5	2016-03-18	w	1.2	iron3	2016-04-28	41	18.2	.	.	.	.	.	.	.	.
564	6	564_6	564_6_6	2016-03-18	w	2.1	iron1	2016-04-28	41	18	.	.	.	.	.	.	.	.
564	6	564_6	564_6_7	2016-03-18	w	1.9	iron1	2016-04-28	41	13.2	.	.	.	.	.	.	.	.
564	6	564_6	564_6_8	2016-03-18	m	1.4	iron1	2016-04-28	41	15.3	.	.	.	.	.	.	.	.
562	8	562_8	562_8_3	2016-04-29	m	1.5	iron1	2016-06-09	41	11.7	.	.	.	.	.	.	.	.
562	8	562_8	562_8_6	2016-04-29	w	1.3	iron3	2016-06-09	41	14.7	.	.	.	.	.	.	.	.
562	8	562_8	562_8_7	2016-04-29	w	1.3	iron3	2016-06-09	41	13.2	.	.	.	.	.	.	.	.
562	8	562_8	562_8_8	2016-04-29	w	1.3	iron1	2016-06-09	41	9.2	.	.	.	.	.	.	.	.
562	8	562_8	562_8_9	2016-04-29	w	1.3	iron3	2016-06-09	41	14.3	.	.	.	.	.	.	.	.
562	8	562_8	562_8_10	2016-04-29	w	1.3	iron1	2016-06-09	41	8.5	.	.	.	.	.	.	.	.
562	8	562_8	562_8_11	2016-04-29	w	1.3	iron2	2016-06-09	41	14.6	.	.	.	.	.	.	.	.
562	8	562_8	562_8_12	2016-04-29	w	1.2	iron2	2016-06-09	41	14.7	.	.	.	.	.	.	.	.
562	8	562_8	562_8_13	2016-04-29	m	1.2	iron2	2016-06-09	41	10.9	.	.	.	.	.	.	.	.
544	3	544_3	544_3_9	2016-04-26	w	1.5	iron1	2016-06-09	44	13.7	.	.	.	.	.	.	.	.
544	3	544_3	544_3_12	2016-04-26	w	1.3	iron1	2016-06-09	44	14.9	.	.	.	.	.	.	.	.
544	3	544_3	544_3_8	2016-04-26	m	1.5	iron3	2016-06-09	44	14	.	.	.	.	.	.	.	.
544	3	544_3	544_3_11	2016-04-26	w	1.4	iron1	2016-06-09	44	14.9	.	.	.	.	.	.	.	.
544	3	544_3	544_3_15	2016-04-26	m	0.9	iron3	2016-06-09	44	10.5	.	.	.	.	.	.	.	.
544	3	544_3	544_3_13	2016-04-26	m	1.1	iron3	2016-06-09	44	.	.	.	.	.	.	.	.	.
544	3	544_3	544_3_10	2016-04-26	w	1.4	iron2	2016-06-09	44	15.9	.	.	.	.	.	.	.	.
544	3	544_3	544_3_7	2016-04-26	w	1.6	iron2	2016-06-09	44	18.9	.	.	.	.	.	.	.	.
544	3	544_3	544_3_6	2016-04-26	m	1.8	iron2	2016-06-09	44	19.3	.	.	.	.	.	.	.	.
2381	3	2381_3	2381_3_6	2016-07-28	w	1.5	iron3	2016-09-08	42	14.1	.	.	.	.	.	.	.	.
2381	3	2381_3	2381_3_9	2016-07-28	w	1.5	iron3	2016-09-08	42	12.4	.	.	.	.	.	.	.	.
2381	3	2381_3	2381_3_12	2016-07-28	w	1.3	iron2	2016-09-08	42	10.4	.	.	.	.	.	.	.	.
2381	3	2381_3	2381_3_11	2016-07-28	m	1.4	iron3	2016-09-08	42	8.6	.	.	.	.	.	.	.	.
2381	3	2381_3	2381_3_7	2016-07-28	m	1.5	iron2	2016-09-08	42	12.8	.	.	.	.	.	.	.	.
2381	3	2381_3	2381_3_1	2016-07-28	m	1.7	iron2	2016-09-08	42	9.8	.	.	.	.	.	.	.	.
2381	3	2381_3	2381_3_10	2016-07-28	m	1.5	iron1	2016-09-08	42	12.6	.	.	.	.	.	.	.	.
2381	3	2381_3	2381_3_4	2016-07-28	w	1.6	iron1	2016-09-08	42	12	.	.	.	.	.	.	.	.
2381	3	2381_3	2381_3_5	2016-07-28	w	1.6	iron1	2016-09-08	42	10.5	.	.	.	.	.	.	.	.
51931	8	51931_8	51931_8_2	2016-07-29	m	1.7	iron3	2016-09-08	41	12.1	.	.	.	.	.	.	.	.
51931	8	51931_8	51931_8_12	2016-07-29	w	1.4	iron3	2016-09-08	41	10.3	.	.	.	.	.	.	.	.
51931	8	51931_8	51931_8_6	2016-07-29	m	1.6	iron2	2016-09-08	41	12.9	.	.	.	.	.	.	.	.
51931	8	51931_8	51931_8_7	2016-07-29	w	1.6	iron3	2016-09-08	41	13.6	.	.	.	.	.	.	.	.
51931	8	51931_8	51931_8_4	2016-07-29	m	1.6	iron2	2016-09-08	41	13	.	.	.	.	.	.	.	.
51931	8	51931_8	51931_8_9	2016-07-29	m	1.5	iron2	2016-09-08	41	11.6	.	.	.	.	.	.	.	.
51931	8	51931_8	51931_8_10	2016-07-29	m	1.4	iron1	2016-09-08	41	11.9	.	.	.	.	.	.	.	.
51931	8	51931_8	51931_8_3	2016-07-29	m	1.7	iron1	2016-09-08	41	9.5	.	.	.	.	.	.	.	.
51931	8	51931_8	51931_8_1	2016-07-29	m	1.8	iron1	2016-09-08	41	9.3	.	.	.	.	.	.	.	.
5533	2	5533_2	5533_2_3	2016-07-28	m	1.8	iron2	2016-09-08	42	13	.	.	.	.	.	.	.	.
5533	2	5533_2	5533_2_11	2016-07-28	m	1.3	iron2	2016-09-08	42	9.7	.	.	.	.	.	.	.	.
5533	2	5533_2	5533_2_2	2016-07-28	m	1.8	iron2	2016-09-08	42	10.6	.	.	.	.	.	.	.	.
5533	2	5533_2	5533_2_6	2016-07-28	m	1.5	iron1	2016-09-08	42	10.2	.	.	.	.	.	.	.	.
5533	2	5533_2	5533_2_10	2016-07-28	w	1.3	iron1	2016-09-08	42	7.8	.	.	.	.	.	.	.	.
5533	2	5533_2	5533_2_8	2016-07-28	m	1.5	iron1	2016-09-08	42	8	.	.	.	.	.	.	.	.
5533	2	5533_2	5533_2_5	2016-07-28	w	1.6	iron3	2016-09-08	42	11.1	.	.	.	.	.	.	.	.
5533	2	5533_2	5533_2_1	2016-07-28	m	1.9	iron3	2016-09-08	42	13.7	.	.	.	.	.	.	.	.
5533	2	5533_2	5533_2_4	2016-07-28	w	1.7	iron3	2016-09-08	42	9.7	.	.	.	.	.	.	.	.
5524	7	5524_7	5524_7_1	2016-08-01	m	2.2	iron1	2016-09-13	43	10.8	.	.	.	.	.	.	.	.
5524	7	5524_7	5524_7_9	2016-08-01	w	0.9	iron3	2016-09-13	43	.	.	.	.	.	.	.	.	.
5524	7	5524_7	5524_7_8	2016-08-01	m	1.6	iron2	2016-09-13	43	21	.	.	.	.	.	.	.	.
5524	7	5524_7	5524_7_3	2016-08-01	w	1.9	iron3	2016-09-13	43	18.9	.	.	.	.	.	.	.	.
5524	7	5524_7	5524_7_7	2016-08-01	w	1.7	iron2	2016-09-13	43	23.2	.	.	.	.	.	.	.	.
5524	7	5524_7	5524_7_5	2016-08-01	w	1.9	iron1	2016-09-13	43	.	.	.	.	.	.	.	.	.
5524	7	5524_7	5524_7_4	2016-08-01	m	1.9	iron2	2016-09-13	43	13.4	.	.	.	.	.	.	.	.
5524	7	5524_7	5524_7_6	2016-08-01	w	1.8	iron1	2016-09-13	43	8.4	.	.	.	.	.	.	.	.
5524	7	5524_7	5524_7_2	2016-08-01	w	2	iron3	2016-09-13	43	24.2	.	.	.	.	.	.	.	.
48242	1	48242_1	48242_1_2	2016-08-03	m	1.4	iron2	2016-09-13	41	10.2	.	.	.	.	.	.	.	.
48242	1	48242_1	48242_1_6	2016-08-03	w	1.1	iron2	2016-09-13	41	9	.	.	.	.	.	.	.	.
48242	1	48242_1	48242_1_1	2016-08-03	w	1.4	iron2	2016-09-13	41	6.9	.	.	.	.	.	.	.	.
48242	1	48242_1	48242_1_7	2016-08-03	w	1.1	iron1	2016-09-13	41	9.8	.	.	.	.	.	.	.	.
48242	1	48242_1	48242_1_9	2016-08-03	w	0.9	iron1	2016-09-13	41	8.1	.	.	.	.	.	.	.	.
48242	1	48242_1	48242_1_5	2016-08-03	w	1.2	iron1	2016-09-13	41	8.6	.	.	.	.	.	.	.	.
48242	1	48242_1	48242_1_8	2016-08-03	m	1	iron3	2016-09-13	41	8.5	.	.	.	.	.	.	.	.
48242	1	48242_1	48242_1_3	2016-08-03	m	1.2	iron3	2016-09-13	41	9.3	.	.	.	.	.	.	.	.
48242	1	48242_1	48242_1_4	2016-08-03	m	1.2	iron3	2016-09-13	41	10.6	.	.	.	.	.	.	.	.
48243	1	48243_1	48243_1_11	2016-08-09	m	1.3	iron1	2016-09-22	44	12	.	.	.	.	.	.	.	.
48243	1	48243_1	48243_1_2	2016-08-09	w	1.6	iron2	2016-09-22	44	13.5	.	.	.	.	.	.	.	.
48243	1	48243_1	48243_1_5	2016-08-09	w	1.6	iron1	2016-09-22	44	12.3	.	.	.	.	.	.	.	.
48243	1	48243_1	48243_1_9	2016-08-09	w	1.4	iron1	2016-09-22	44	13.6	.	.	.	.	.	.	.	.
48243	1	48243_1	48243_1_3	2016-08-09	m	1.6	iron2	2016-09-22	44	13.5	.	.	.	.	.	.	.	.
48243	1	48243_1	48243_1_10	2016-08-09	w	1.4	iron2	2016-09-22	44	11.2	.	.	.	.	.	.	.	.
48243	1	48243_1	48243_1_1	2016-08-09	m	1.8	iron3	2016-09-22	44	13.3	.	.	.	.	.	.	.	.
48243	1	48243_1	48243_1_4	2016-08-09	w	1.6	iron3	2016-09-22	44	14.5	.	.	.	.	.	.	.	.
48243	1	48243_1	48243_1_8	2016-08-09	m	1.4	iron3	2016-09-22	44	13.5	.	.	.	.	.	.	.	.
5526	2	5526_2	5526_2_10	2016-08-13	w	1.8	iron1	2016-09-22	40	10.5	.	.	.	.	.	.	.	.
5526	2	5526_2	5526_2_5	2016-08-13	w	2	iron3	2016-09-22	40	11.6	.	.	.	.	.	.	.	.
5526	2	5526_2	5526_2_4	2016-08-13	w	2.1	iron3	2016-09-22	40	10.3	.	.	.	.	.	.	.	.
5526	2	5526_2	5526_2_12	2016-08-13	m	1.4	iron1	2016-09-22	40	9.5	.	.	.	.	.	.	.	.
5526	2	5526_2	5526_2_6	2016-08-13	w	2	iron3	2016-09-22	40	11.7	.	.	.	.	.	.	.	.
5526	2	5526_2	5526_2_9	2016-08-13	w	1.8	iron1	2016-09-22	40	10.6	.	.	.	.	.	.	.	.
5526	2	5526_2	5526_2_1	2016-08-13	w	2.2	iron2	2016-09-22	40	12.8	.	.	.	.	.	.	.	.
5526	2	5526_2	5526_2_7	2016-08-13	w	1.9	iron2	2016-09-22	40	12	.	.	.	.	.	.	.	.
5526	2	5526_2	5526_2_2	2016-08-13	m	2.2	iron2	2016-09-22	40	13.4	.	.	.	.	.	.	.	.
543	3	543_3	543_3_1	2016-10-19	w	2	iron2	2016-12-02	44	17.8	.	.	.	.	.	.	.	.
543	3	543_3	543_3_10	2016-10-19	w	1.3	iron1	2016-12-02	44	11.8	.	.	.	.	.	.	.	.
543	3	543_3	543_3_2	2016-10-19	w	1.7	iron1	2016-12-02	44	13.7	.	.	.	.	.	.	.	.
543	3	543_3	543_3_11	2016-10-19	w	1.2	iron2	2016-12-02	44	14.7	.	.	.	.	.	.	.	.
543	3	543_3	543_3_9	2016-10-19	m	1.3	iron1	2016-12-02	44	12	.	.	.	.	.	.	.	.
543	3	543_3	543_3_8	2016-10-19	m	1.3	iron2	2016-12-02	44	13.5	.	.	.	.	.	.	.	.
543	3	543_3	543_3_5	2016-10-19	w	1.5	iron3	2016-12-02	44	15.4	.	.	.	.	.	.	.	.
543	3	543_3	543_3_6	2016-10-19	w	1.4	iron3	2016-12-02	44	14.7	.	.	.	.	.	.	.	.
543	3	543_3	543_3_4	2016-10-19	w	1.6	iron3	2016-12-02	44	14.8	.	.	.	.	.	.	.	.
544	4	544_4	544_4_2	2016-10-07	w	1.6	iron1	2016-11-18	42	.	.	.	.	.	.	.	.	.
544	4	544_4	544_4_5	2016-10-07	m	1.3	iron3	2016-11-18	42	17.6	.	.	.	.	.	.	.	.
544	4	544_4	544_4_1	2016-10-07	m	1.9	iron1	2016-11-18	42	15	.	.	.	.	.	.	.	.
544	4	544_4	544_4_9	2016-10-07	m	1	iron1	2016-11-18	42	11	.	.	.	.	.	.	.	.
544	4	544_4	544_4_8	2016-10-07	m	1.1	iron3	2016-11-18	42	13.6	.	.	.	.	.	.	.	.
544	4	544_4	544_4_4	2016-10-07	m	1.4	iron2	2016-11-18	42	12.3	.	.	.	.	.	.	.	.
544	4	544_4	544_4_6	2016-10-07	w	1.2	iron3	2016-11-18	42	13.3	.	.	.	.	.	.	.	.
544	4	544_4	544_4_7	2016-10-07	m	1.2	iron2	2016-11-18	42	11.4	.	.	.	.	.	.	.	.
544	4	544_4	544_4_3	2016-10-07	m	1.6	iron2	2016-11-18	42	15.9	.	.	.	.	.	.	.	.
561	9	561_9	561_9_4	2016-09-01	w	1.5	iron2	2016-10-13	42	12.7	.	.	.	.	.	.	.	.
561	9	561_9	561_9_11	2016-09-01	w	1.2	iron3	2016-10-13	42	12.1	.	.	.	.	.	.	.	.
561	9	561_9	561_9_2	2016-09-01	w	1.5	iron2	2016-10-13	42	14.1	.	.	.	.	.	.	.	.
561	9	561_9	561_9_5	2016-09-01	m	1.5	iron3	2016-10-13	42	12.2	.	.	.	.	.	.	.	.
561	9	561_9	561_9_1	2016-09-01	w	1.6	iron3	2016-10-13	42	13.6	.	.	.	.	.	.	.	.
561	9	561_9	561_9_7	2016-09-01	w	1.4	iron2	2016-10-13	42	11.2	.	.	.	.	.	.	.	.
561	9	561_9	561_9_8	2016-09-01	m	1.3	iron1	2016-10-13	42	11.9	.	.	.	.	.	.	.	.
561	9	561_9	561_9_13	2016-09-01	m	1.2	iron1	2016-10-13	42	8.3	.	.	.	.	.	.	.	.
561	9	561_9	561_9_3	2016-09-01	w	1.5	iron1	2016-10-13	42	10.6	.	.	.	.	.	.	.	.
562	9	562_9	562_9_4	2016-10-06	w	1.6	iron1	2016-11-18	43	14.6	.	.	.	.	.	.	.	.
562	9	562_9	562_9_3	2016-10-06	w	1.8	iron1	2016-11-18	43	16.1	.	.	.	.	.	.	.	.
562	9	562_9	562_9_8	2016-10-06	w	1.4	iron2	2016-11-18	43	14.4	.	.	.	.	.	.	.	.
562	9	562_9	562_9_2	2016-10-06	w	1.9	iron2	2016-11-18	43	15.9	.	.	.	.	.	.	.	.
562	9	562_9	562_9_5	2016-10-06	m	1.6	iron3	2016-11-18	43	12.8	.	.	.	.	.	.	.	.
562	9	562_9	562_9_6	2016-10-06	m	1.4	iron1	2016-11-18	43	12.9	.	.	.	.	.	.	.	.
562	9	562_9	562_9_7	2016-10-06	m	1.4	iron2	2016-11-18	43	13.9	.	.	.	.	.	.	.	.
562	9	562_9	562_9_11	2016-10-06	w	1.3	iron3	2016-11-18	43	13.2	.	.	.	.	.	.	.	.
562	9	562_9	562_9_1	2016-10-06	w	1.9	iron3	2016-11-18	43	17.8	.	.	.	.	.	.	.	.
1911	7	1911_7	1911_7_4	2016-10-07	m	1.8	iron3	2016-11-18	42	14.9	.	.	.	.	.	.	.	.
1911	7	1911_7	1911_7_7	2016-10-07	w	1.3	iron3	2016-11-18	42	11.7	.	.	.	.	.	.	.	.
1911	7	1911_7	1911_7_1	2016-10-07	m	2	iron3	2016-11-18	42	.	.	.	.	.	.	.	.	.
1911	7	1911_7	1911_7_3	2016-10-07	w	1.8	iron2	2016-11-18	42	15.4	.	.	.	.	.	.	.	.
1911	7	1911_7	1911_7_2	2016-10-07	w	1.8	iron2	2016-11-18	42	15.1	.	.	.	.	.	.	.	.
1911	7	1911_7	1911_7_5	2016-10-07	w	1.7	iron2	2016-11-18	42	16	.	.	.	.	.	.	.	.
1911	7	1911_7	1911_7_10	2016-10-07	w	1.8	iron1	2016-11-18	42	10.4	.	.	.	.	.	.	.	.
1911	7	1911_7	1911_7_8	2016-10-07	w	1.1	iron1	2016-11-18	42	8.1	.	.	.	.	.	.	.	.
1911	7	1911_7	1911_7_6	2016-10-07	m	1.5	iron1	2016-11-18	42	12.6	.	.	.	.	.	.	.	.
1913	1	1913_1	1913_1_2	2016-10-10	m	1.2	iron1	2016-11-18	39	7.9	.	.	.	.	.	.	.	.
1913	1	1913_1	1913_1_6	2016-10-10	m	1.1	iron2	2016-11-18	39	6.9	.	.	.	.	.	.	.	.
1913	1	1913_1	1913_1_7	2016-10-10	m	1	iron3	2016-11-18	39	8.4	.	.	.	.	.	.	.	.
1913	1	1913_1	1913_1_5	2016-10-10	w	1.1	iron1	2016-11-18	39	9.4	.	.	.	.	.	.	.	.
1913	1	1913_1	1913_1_1	2016-10-10	m	1.4	iron2	2016-11-18	39	10.5	.	.	.	.	.	.	.	.
1913	1	1913_1	1913_1_4	2016-10-10	m	1.2	iron1	2016-11-18	39	10.4	.	.	.	.	.	.	.	.
1913	1	1913_1	1913_1_10	2016-10-10	m	1	iron2	2016-11-18	39	9.6	.	.	.	.	.	.	.	.
1913	1	1913_1	1913_1_3	2016-10-10	w	1.2	iron3	2016-11-18	39	12.3	.	.	.	.	.	.	.	.
1913	1	1913_1	1913_1_9	2016-10-10	w	1	iron3	2016-11-18	39	10.8	.	.	.	.	.	.	.	.
1915	2	1915_2	1915_2_2	2016-10-19	w	1.7	iron1	2016-12-02	44	12	.	.	.	.	.	.	.	.
1915	2	1915_2	1915_2_3	2016-10-19	m	1.5	iron1	2016-12-02	44	13.1	.	.	.	.	.	.	.	.
1915	2	1915_2	1915_2_1	2016-10-19	w	1.8	iron1	2016-12-02	44	13.1	.	.	.	.	.	.	.	.
1915	2	1915_2	1915_2_7	2016-10-19	w	1.3	iron3	2016-12-02	44	14.7	.	.	.	.	.	.	.	.
1915	2	1915_2	1915_2_9	2016-10-19	w	1.3	iron3	2016-12-02	44	14.4	.	.	.	.	.	.	.	.
1915	2	1915_2	1915_2_10	2016-10-19	m	1.3	iron3	2016-12-02	44	15.7	.	.	.	.	.	.	.	.
1915	2	1915_2	1915_2_4	2016-10-19	m	1.5	iron2	2016-12-02	44	16	.	.	.	.	.	.	.	.
1915	2	1915_2	1915_2_5	2016-10-19	m	1.4	iron2	2016-12-02	44	14.6	.	.	.	.	.	.	.	.
1915	2	1915_2	1915_2_6	2016-10-19	w	1.3	iron2	2016-12-02	44	14.2	.	.	.	.	.	.	.	.
2111	1	2111_1	2111_1_13	2016-09-02	w	0.9	iron1	2016-10-13	41	6.9	.	.	.	.	.	.	.	.
2111	1	2111_1	2111_1_5	2016-09-02	m	1.3	iron1	2016-10-13	41	6.9	.	.	.	.	.	.	.	.
2111	1	2111_1	2111_1_2	2016-09-02	m	1.4	iron3	2016-10-13	41	9	.	.	.	.	.	.	.	.
2111	1	2111_1	2111_1_8	2016-09-02	w	1.2	iron1	2016-10-13	41	8.3	.	.	.	.	.	.	.	.
2111	1	2111_1	2111_1_1	2016-09-02	w	1.5	iron3	2016-10-13	41	9.1	.	.	.	.	.	.	.	.
2111	1	2111_1	2111_1_3	2016-09-02	w	1.4	iron2	2016-10-13	41	7.5	.	.	.	.	.	.	.	.
2111	1	2111_1	2111_1_7	2016-09-02	m	1.3	iron3	2016-10-13	41	7.2	.	.	.	.	.	.	.	.
2111	1	2111_1	2111_1_10	2016-09-02	w	1	iron2	2016-10-13	41	7.5	.	.	.	.	.	.	.	.
2111	1	2111_1	2111_1_6	2016-09-02	w	1.3	iron2	2016-10-13	41	6.1	.	.	.	.	.	.	.	.
2382	2	2382_2	2382_2_4	2016-10-24	m	1.7	iron2	2016-12-02	39	13.1	.	.	.	.	.	.	.	.
2382	2	2382_2	2382_2_6	2016-10-24	m	1.5	iron2	2016-12-02	39	.	.	.	.	.	.	.	.	.
2382	2	2382_2	2382_2_12	2016-10-24	w	1.1	iron2	2016-12-02	39	9.9	.	.	.	.	.	.	.	.
2382	2	2382_2	2382_2_7	2016-10-24	w	1.3	iron1	2016-12-02	39	.	.	.	.	.	.	.	.	.
2382	2	2382_2	2382_2_1	2016-10-24	m	2.1	iron2	2016-12-02	39	.	.	.	.	.	.	.	.	.
2382	2	2382_2	2382_2_5	2016-10-24	w	1.6	iron2	2016-12-02	39	10.8	.	.	.	.	.	.	.	.
2382	2	2382_2	2382_2_8	2016-10-24	w	1.2	iron2	2016-12-02	39	8.5	.	.	.	.	.	.	.	.
2382	2	2382_2	2382_2_3	2016-10-24	m	1.7	iron1	2016-12-02	39	9.9	.	.	.	.	.	.	.	.
2382	2	2382_2	2382_2_2	2016-10-24	w	1.8	iron1	2016-12-02	39	12.2	.	.	.	.	.	.	.	.
2383	2	2383_2	2383_2_3	2016-10-22	w	1.7	iron3	2016-12-02	41	13.8	.	.	.	.	.	.	.	.
2383	2	2383_2	2383_2_1	2016-10-22	w	1.9	iron3	2016-12-02	41	14	.	.	.	.	.	.	.	.
2383	2	2383_2	2383_2_5	2016-10-22	m	1.5	iron3	2016-12-02	41	.	.	.	.	.	.	.	.	.
2383	2	2383_2	2383_2_2	2016-10-22	m	1.7	iron1	2016-12-02	41	.	.	.	.	.	.	.	.	.
2383	2	2383_2	2383_2_7	2016-10-22	w	1.4	iron1	2016-12-02	41	10	.	.	.	.	.	.	.	.
2383	2	2383_2	2383_2_10	2016-10-22	m	1.3	iron1	2016-12-02	41	11.3	.	.	.	.	.	.	.	.
2383	2	2383_2	2383_2_9	2016-10-22	w	1.4	iron2	2016-12-02	41	12.3	.	.	.	.	.	.	.	.
2383	2	2383_2	2383_2_11	2016-10-22	w	1.3	iron2	2016-12-02	41	14.8	.	.	.	.	.	.	.	.
2383	2	2383_2	2383_2_4	2016-10-22	m	1.7	iron2	2016-12-02	41	11.8	.	.	.	.	.	.	.	.
5014	9	5014_9	5014_9_7	2016-10-20	w	1.6	iron2	2016-12-02	43	11.4	.	.	.	.	.	.	.	.
5014	9	5014_9	5014_9_5	2016-10-20	w	1.7	iron1	2016-12-02	43	8.8	.	.	.	.	.	.	.	.
5014	9	5014_9	5014_9_9	2016-10-20	m	1.3	iron3	2016-12-02	43	11.3	.	.	.	.	.	.	.	.
5014	9	5014_9	5014_9_3	2016-10-20	m	1.8	iron2	2016-12-02	43	16.8	.	.	.	.	.	.	.	.
5014	9	5014_9	5014_9_1	2016-10-20	w	2.1	iron1	2016-12-02	43	15.3	.	.	.	.	.	.	.	.
5014	9	5014_9	5014_9_4	2016-10-20	m	1.7	iron2	2016-12-02	43	15.3	.	.	.	.	.	.	.	.
5014	9	5014_9	5014_9_2	2016-10-20	w	1.8	iron1	2016-12-02	43	10	.	.	.	.	.	.	.	.
5014	9	5014_9	5014_9_6	2016-10-20	m	1.7	iron3	2016-12-02	43	16	.	.	.	.	.	.	.	.
5014	9	5014_9	5014_9_8	2016-10-20	m	1.5	iron3	2016-12-02	43	14.6	.	.	.	.	.	.	.	.

## Sheet: legend
legend
sow	ear tag number of the mother
parity	number of the current litter of the sow
litter_id	combination of ear tag number of the sow and parity
piglet_id	combination of litter_id and number of the piglet within the litter
birth_date	date of birth given as MM/DD/YY
sex	m = male, f = female
lw_birth	live weight at birth, given in kg
treatment	iron1 = one iron injection on day 3, iron 2 = two iron injections on day 3 and 14, iron3 = three iron injections on day 3, 14 and 21
sampling_date	date of sampling, given as MM/DD/YY
day_of_life	age of the piglets, given in days
liveweight	live weight, given in kg
haematocrit	blood haematocrit content, given in % by volume
serum_iron	serum iron content, given in µmol L-1
weaning_age	age at weaning, given in days
daily_gain	average daily gain until weaning, given in g
loss_3_14	dead between day 3 and 14, given as no (0) or yes (1)
loss_14_wean	dead between day 14 and weaning, given as no (0) or yes (1)
treatm_3_14	medical treatment between day 3 and 14, given as no (0) or yes (1)
treatm_14_wean	medical treatment between day 14 and weaning, given as no (0) or yes (1)
